# Supplementary material for: Detection and Segmentation of Cell Nuclei in Virtual Microscopy Images: A Minimum-Model Approach
Source: PubMed Central journal article supplement — Sci Rep. 2012 Jul 11;2:503. doi: 10.1038/srep00503 (PMC3394088; doi:10.1038/srep00503), 2012-07-11
Supplement: srep00503-s1.pdf [file srep00503-s1.pdf]

## Supplementary Information

### **Detection and Segmentation of Cell Nuclei in Virtual Microscopy Images: A Minimum-Model Approach**

Stephan Wienert<sup>1,2</sup>, Daniel Heim<sup>2</sup>, Kai Saeger<sup>2</sup>, Albrecht Stenzinger<sup>3</sup>, Michael Beil<sup>4</sup>, Peter Hufnagl<sup>1</sup>, Manfred Dietel<sup>1</sup>, Carsten Denkert<sup>1</sup>, Frederick Klauschen<sup>1\*</sup>

<sup>1</sup> Institute of Pathology, Charité University Hospital Berlin, Charitéplatz 1, 10117 Berlin, Germany

<sup>2</sup> VMscope GmbH, Charitéplatz 1, 10117 Berlin, Germany

<sup>3</sup> Institute of Pathology, University Hospital Heidelberg, Im Neuenheimer Feld 220/221, 69120 Heidelberg, Germany

<sup>4</sup> Department of Medicine I, University of Ulm, Albert-Einstein-Allee 23, 89081 Ulm, Germany

\* Correspondance should be addressed to frederick.klauschen@charite.de

### **Contents**

|             |                                                                   |
|-------------|-------------------------------------------------------------------|
| Note S1:    | Method validation                                                 |
| Note S3:    | Example of influence of image focus on cell nucleus segmentation  |
| Note S4:    | Application in the field of correlative light electron microscopy |
| Methods S5: | Seed point and extremal value detection                           |
| Methods S6: | Description of the “8M” algorithm [Hufnagl. et al.]               |
| Methods S7: | Remove non-compact object pixels                                  |
| Methods S8: | Separate concave objects                                          |

### **Note S1: Method validation**

To assess the accuracy of the proposed method 7931 cells from 36 images were labeled by three pathologists (FK, AS, CD). All images were labeled by three pathologists and only cells for which consensus was achieved were included. All other cells were left unlabeled. A comparison to Al-Kofahis method (Al-Kofahi et al. 2010) was performed using first the default (fully automatic) mode (which was recommended by the authors upon request) and second, using an optimized parameter configuration file provided by the authors after submitting test data to them. The images (600x600 pixels, Hematoxylin-Eosin stained) were taken from previously digitized routine diagnostic cases (see Methods for further details). After manual labeling the images were segmented and true positive (tp), false negative (fn) and false positive (fp) events were automatically determined using the positional information previously obtained in the manual “gold-standard“ cell labeling. Cells touching the image border were excluded from the analysis. Image pairs show 1) the original image and 2) the image showing the nucleus contours (green) combined with the manually assigned labels that were automatically classified as true positive (green dots), false negative (red dots) and false positive (yellow dots) according to the following definition: 1) true positive: cell nuclei whose area contained a pathologist-assigned label. A contour containing two pathologist-assigned labels will result in two true positives; 2) false positive: objects defined as cell nuclei by automated segmentation but with no manual label; 3) false negative: manually labeled cell nuclei not detected in the segmentation result. A conglomerate score was calculated to evaluate the ability of the algorithms to correctly separate conglomerates. The computation time of each image was also measured. All algorithms used were parallelized. The time measured includes the time executing the color deconvolution for the algorithm presented in this paper but it is not included in the time of the Al-Kofahi algorithms. On the other hand the Al-Kofahi algorithms were started as extra process so some process overhead time is included in their times.

Statistical values are defined as follows:

- Precision =  $tp / (tp + fp)$ .
- Recall =  $tp / (tp + fn)$ .
- Conglomerate =  $(\text{Number of detected cells} - fp) / tp$

All other ratios are computed dividing the count of samples specified in the respective

column by the nuclei count.

The following pictures always are ordered as follows: original, result of “Wienert”, result of “Al-Kofahi quality”. The results of “Al-Kofahi speed” are not visualized but listed in the tables.

The result images contain different scenarios where the result may be hard to understand and therefore shall be described here briefly.

Contour containing red and yellow dots:

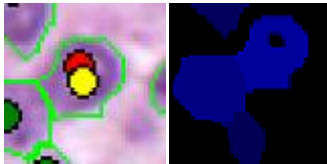

This can happen because only outer contours are rendered. The map of this image shows a hole in this cell core, so the pixel in the map where the pathologist clicked to mark the nuclei is not marked in the result label map of the algorithm.

Contour seems to fit nuclei but is false positive with a close false negative point:

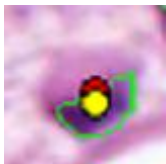

This is because only one pixel was labeled by the pathologist and the contour does not contain or enclose that point.

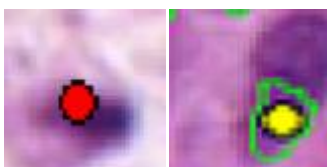

False negatives or false positives that you would not expect at the image border:

Contours with pixels at the image border were removed and only nuclei completely contained by an image were labeled. So a too wide contour at the image border may result in false negative and a too small contour in false positive.

1

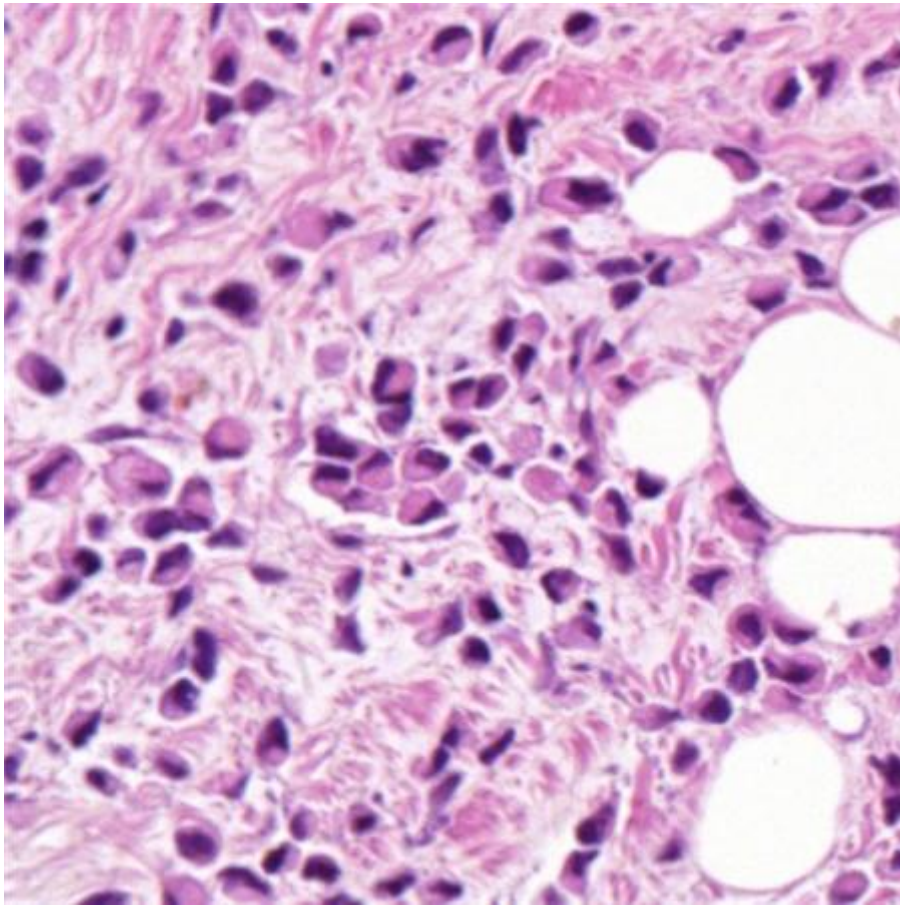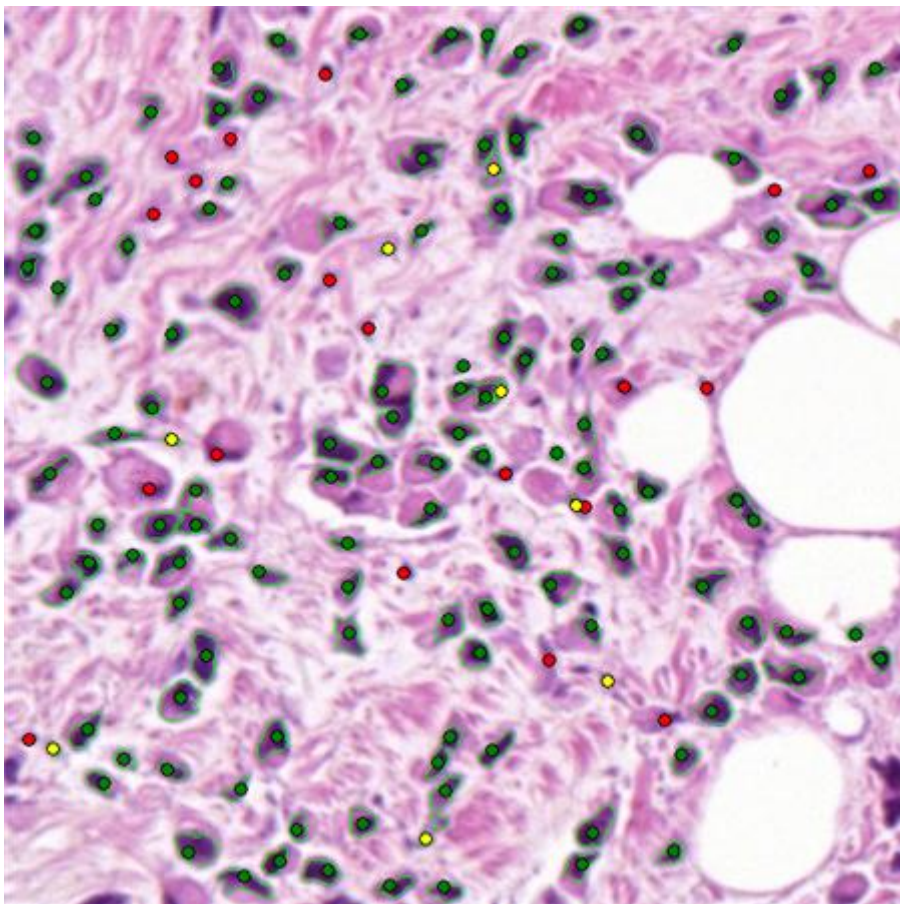

Wienert

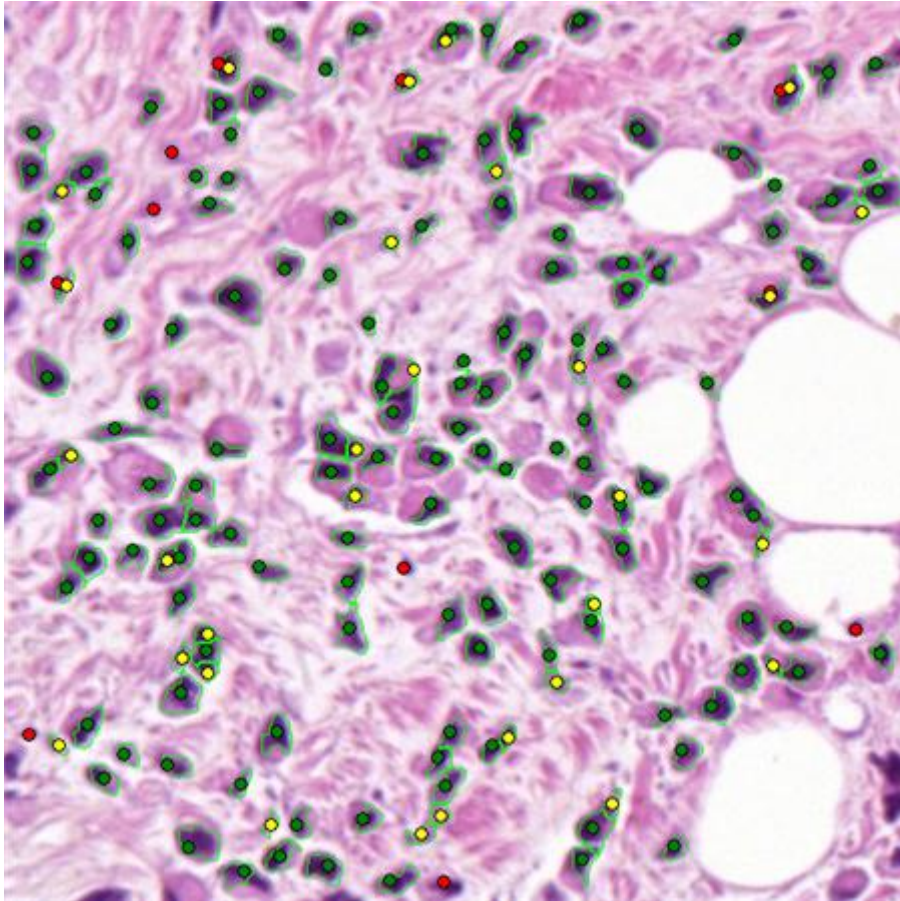

Al-Kofahi (optimized)

|                      | <b>Wienert</b> | <b>Al-Kofahi (automatic)</b> | <b>Al-Kofahi (optimized)</b> |
|----------------------|----------------|------------------------------|------------------------------|
| nuclei               | 147            | 147                          | 147                          |
| true positive count  | 128            | 136                          | 136                          |
| false negative count | 19             | 11                           | 11                           |
| false positive count | 8              | 36                           | 30                           |
| precision            | 0,941          | 0,791                        | 0,819                        |
| recall               | 0,871          | 0,925                        | 0,925                        |
| conglomerate         | 0,969          | 0,993                        | 0,993                        |
| time(ms)             | 702            | 624                          | 1685                         |

2

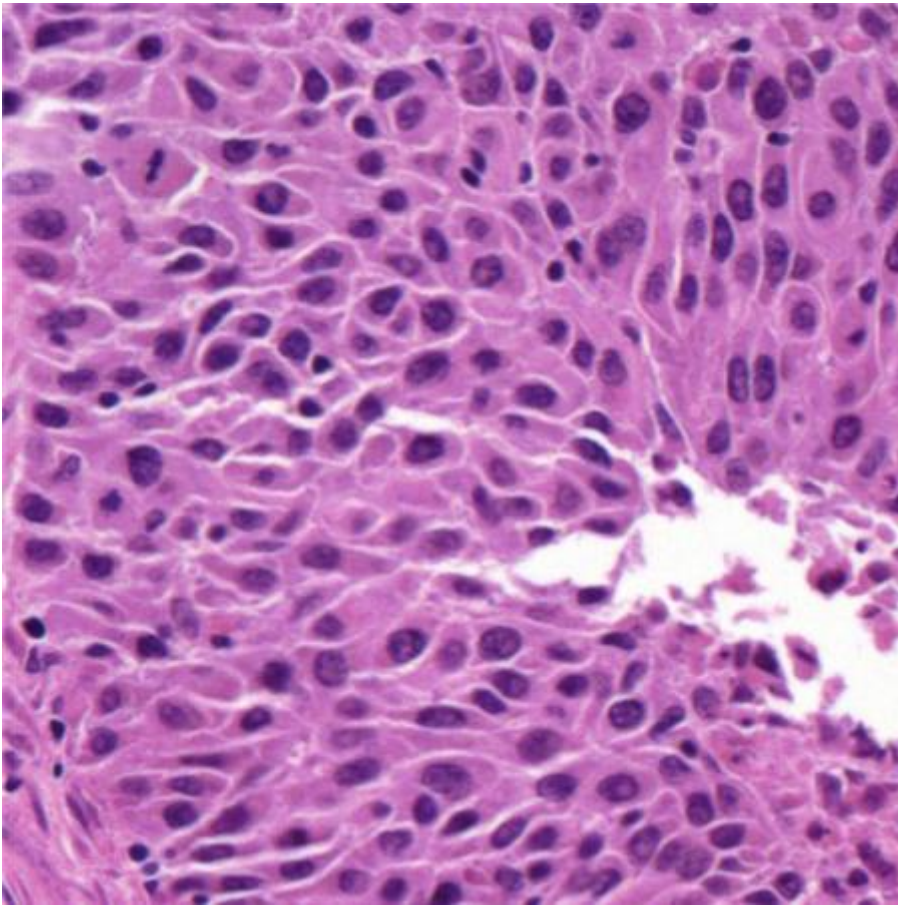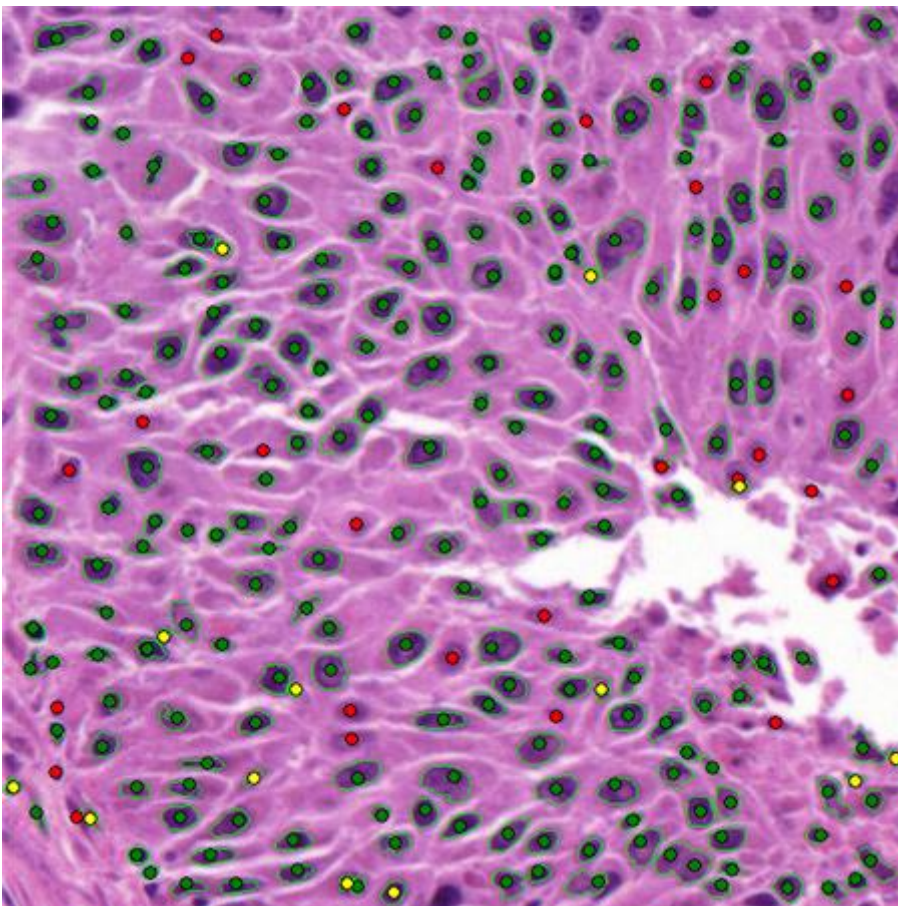

Wienert

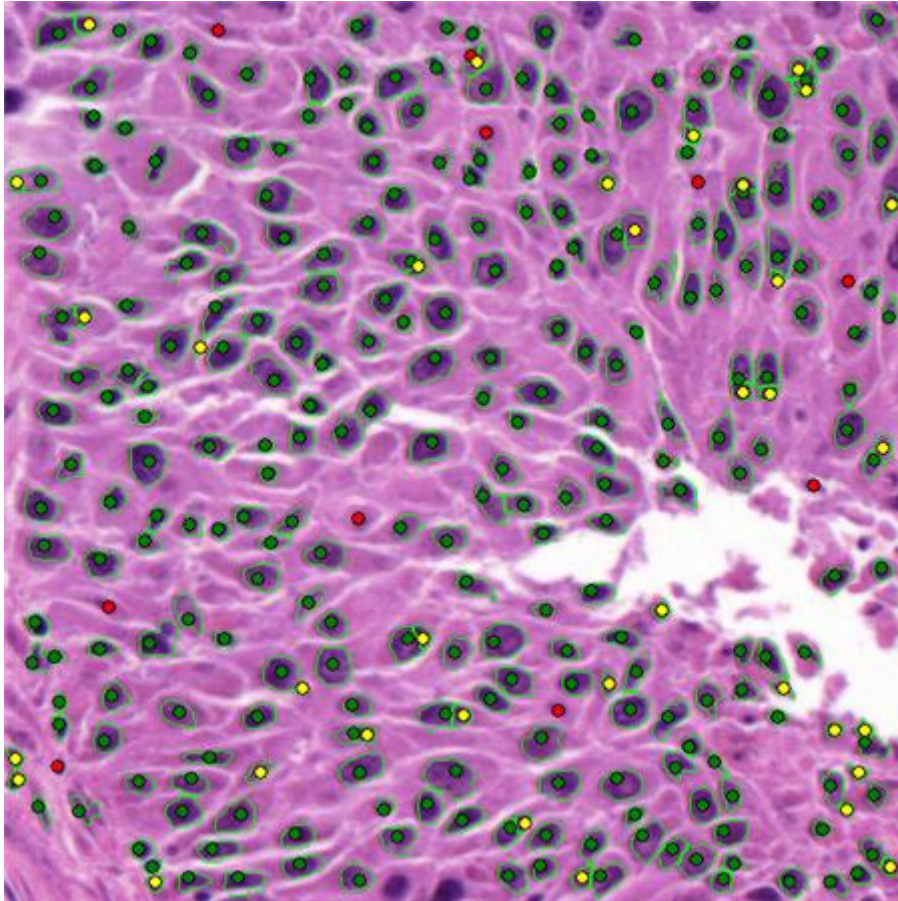

AI-Kofahi (optimized)

|                      | <b>Wienert</b> | <b>AI-Kofahi (automatic)</b> | <b>AI-Kofahi (optimized)</b> |
|----------------------|----------------|------------------------------|------------------------------|
| nuclei               | 265            | 265                          | 265                          |
| true positive count  | 236            | 254                          | 255                          |
| false negative count | 29             | 11                           | 10                           |
| false positive count | 13             | 43                           | 35                           |
| precision            | 0,948          | 0,855                        | 0,879                        |
| recall               | 0,891          | 0,958                        | 0,962                        |
| conglomerate         | 0,992          | 0,988                        | 0,988                        |
| time(ms)             | 764            | 639                          | 2137                         |



3

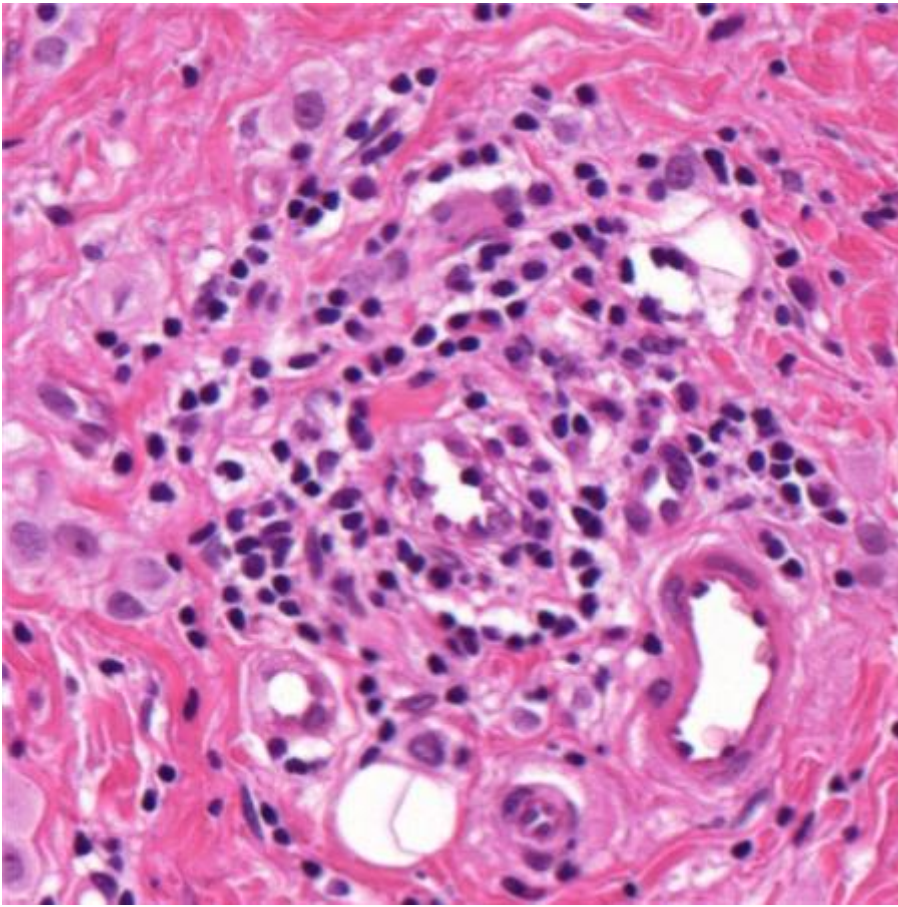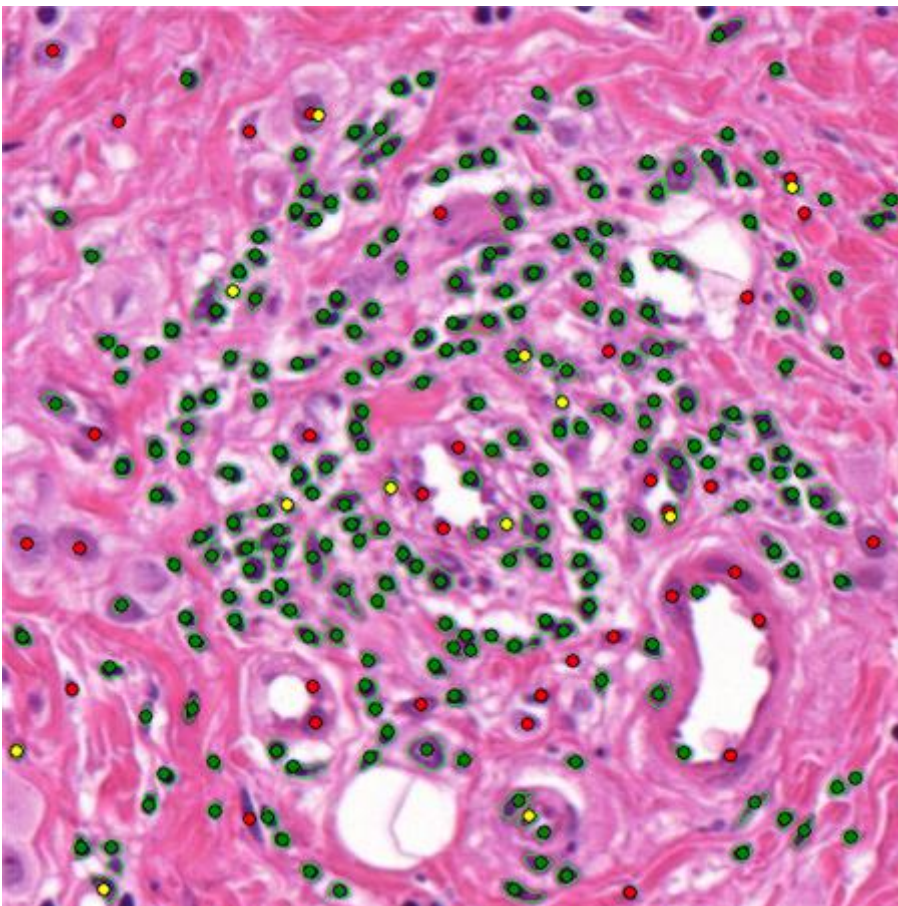

Wienert

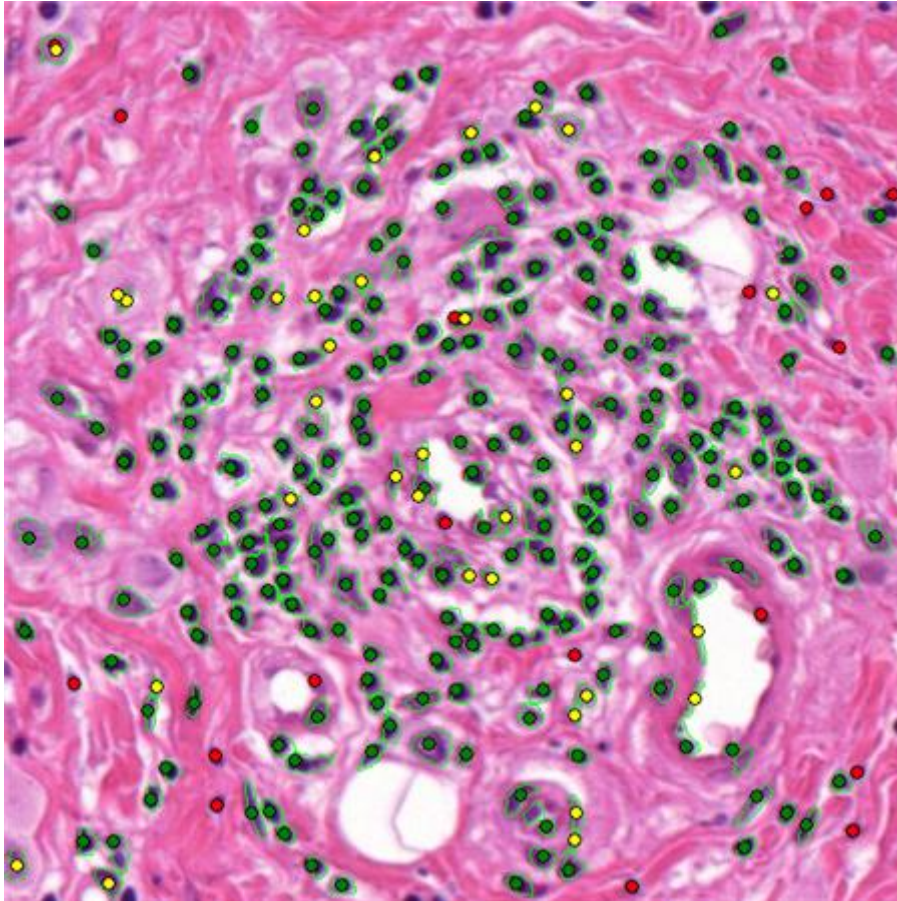

Al-Kofahi (optimized)

|                      | Wienert | Al-Kofahi (automatic) | Al-Kofahi (optimized) |
|----------------------|---------|-----------------------|-----------------------|
| nuclei               | 270     | 270                   | 270                   |
| true positive count  | 235     | 252                   | 252                   |
| false negative count | 35      | 18                    | 18                    |
| false positive count | 12      | 96                    | 34                    |
| precision            | 0,951   | 0,724                 | 0,881                 |
| recall               | 0,870   | 0,933                 | 0,933                 |
| conglomerate         | 0,906   | 0,948                 | 0,956                 |
| time(ms)             | 686     | 655                   | 1950                  |

4

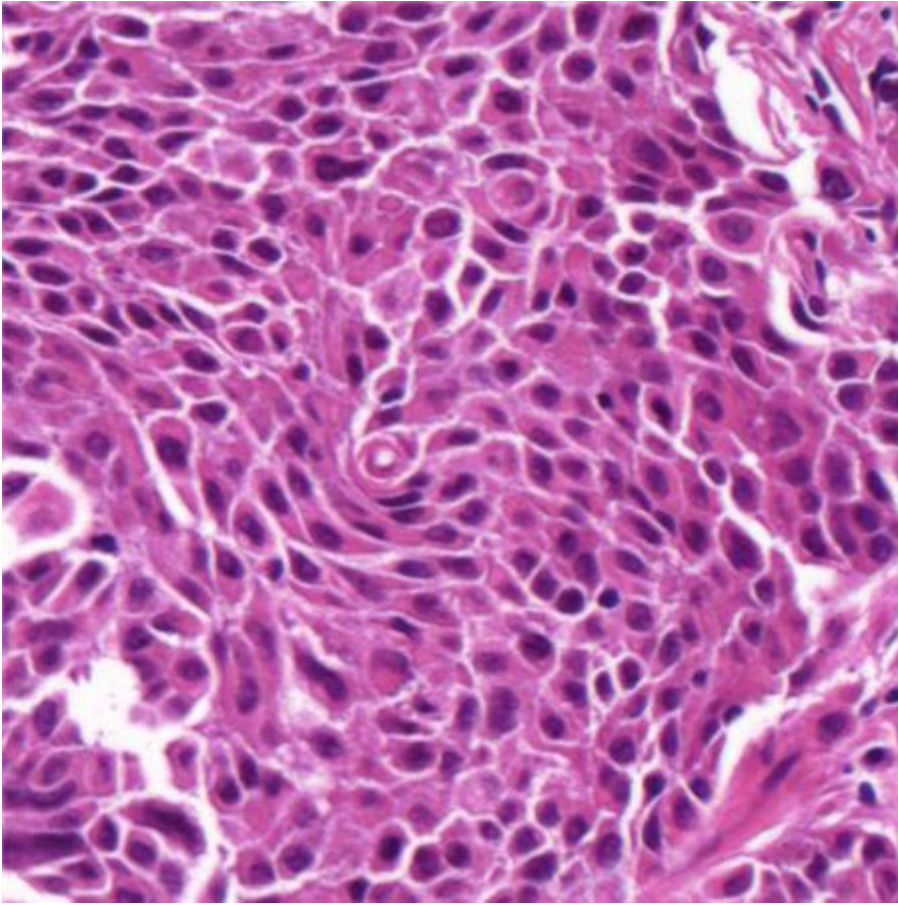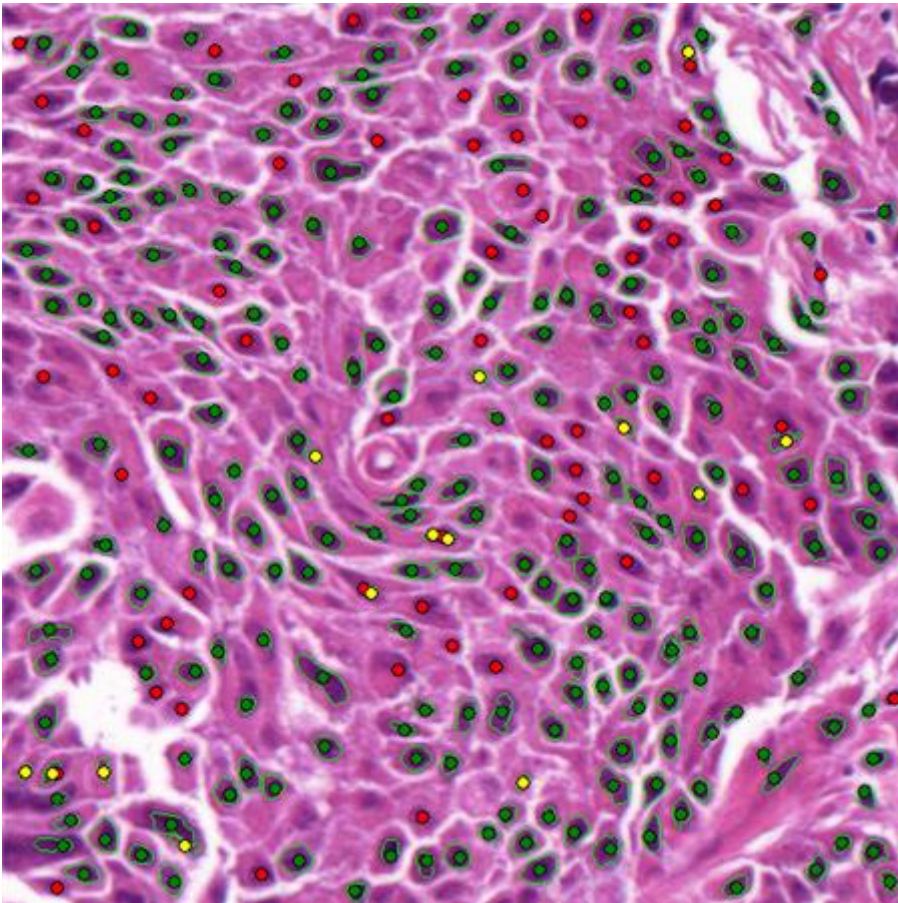

Wienert

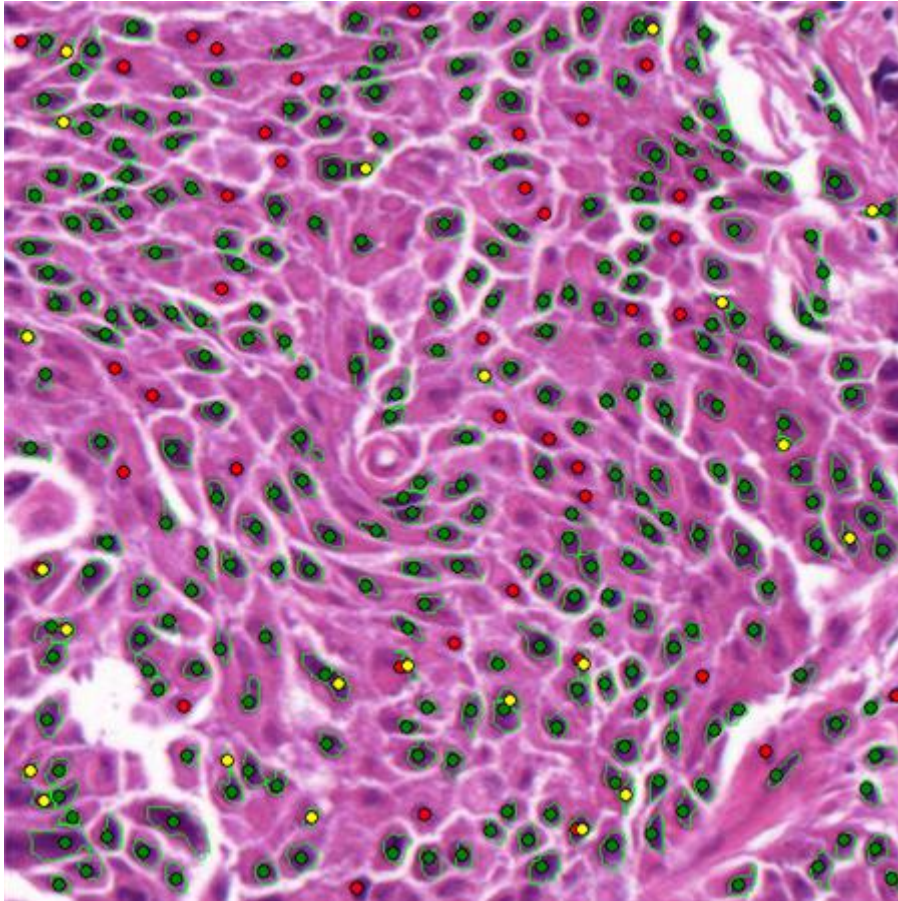

Al-Kofahi (optimized)

|                      | <b>Wienert</b> | <b>Al-Kofahi (automatic)</b> | <b>Al-Kofahi (optimized)</b> |
|----------------------|----------------|------------------------------|------------------------------|
| nuclei               | 305            | 305                          | 305                          |
| true positive count  | 240            | 265                          | 265                          |
| false negative count | 65             | 40                           | 40                           |
| false positive count | 14             | 49                           | 22                           |
| precision            | 0,945          | 0,844                        | 0,923                        |
| recall               | 0,787          | 0,869                        | 0,869                        |
| conglomerate         | 0,991          | 0,989                        | 0,985                        |
| time(ms)             | 639            | 780                          | 2043                         |

5

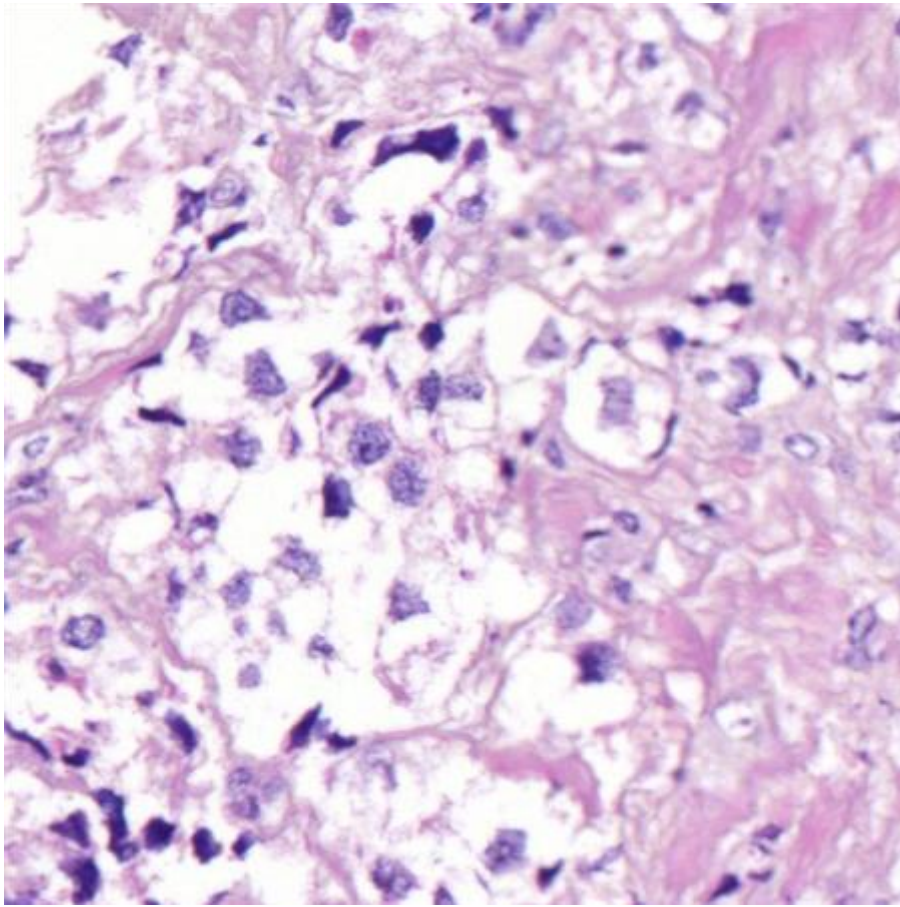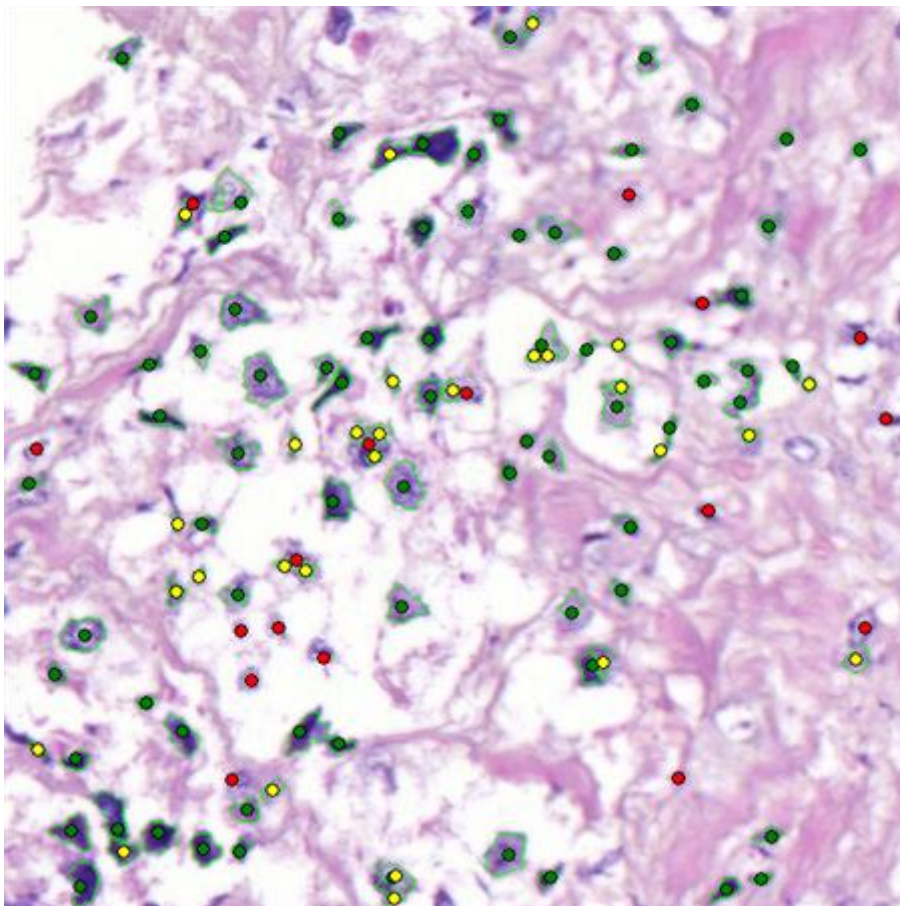

Wienert

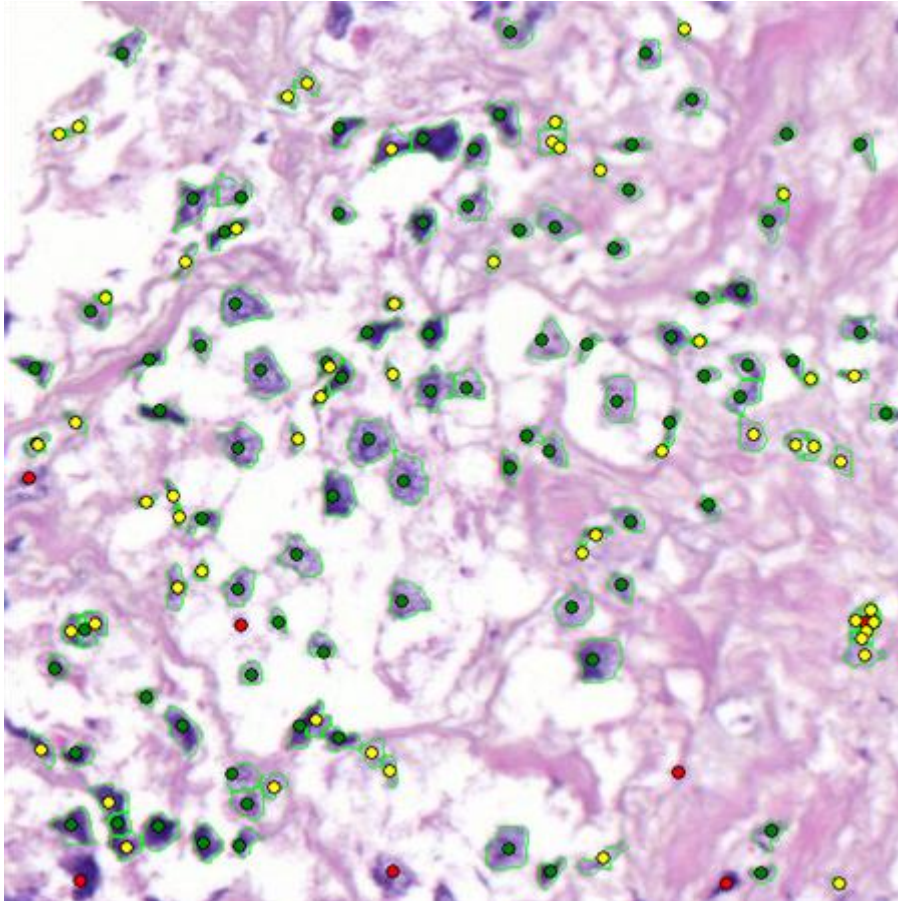

Al-Kofahi (optimized)

|                      | Wienert | Al-Kofahi (automatic) | Al-Kofahi (optimized) |
|----------------------|---------|-----------------------|-----------------------|
| nuclei               | 93      | 93                    | 93                    |
| true positive count  | 76      | 85                    | 85                    |
| false negative count | 17      | 8                     | 8                     |
| false positive count | 28      | 48                    | 54                    |
| precision            | 0,731   | 0,639                 | 0,612                 |
| recall               | 0,817   | 0,914                 | 0,914                 |
| conglomerate         | 0,987   | 0,988                 | 1,000                 |
| time(ms)             | 608     | 780                   | 1606                  |

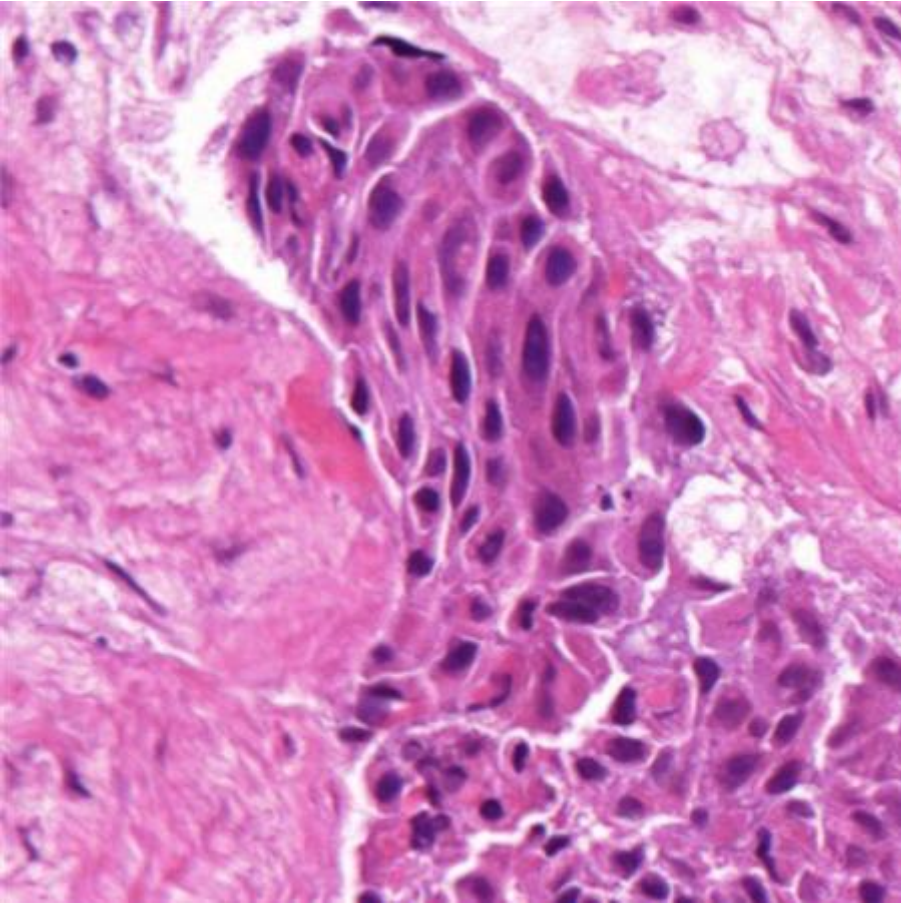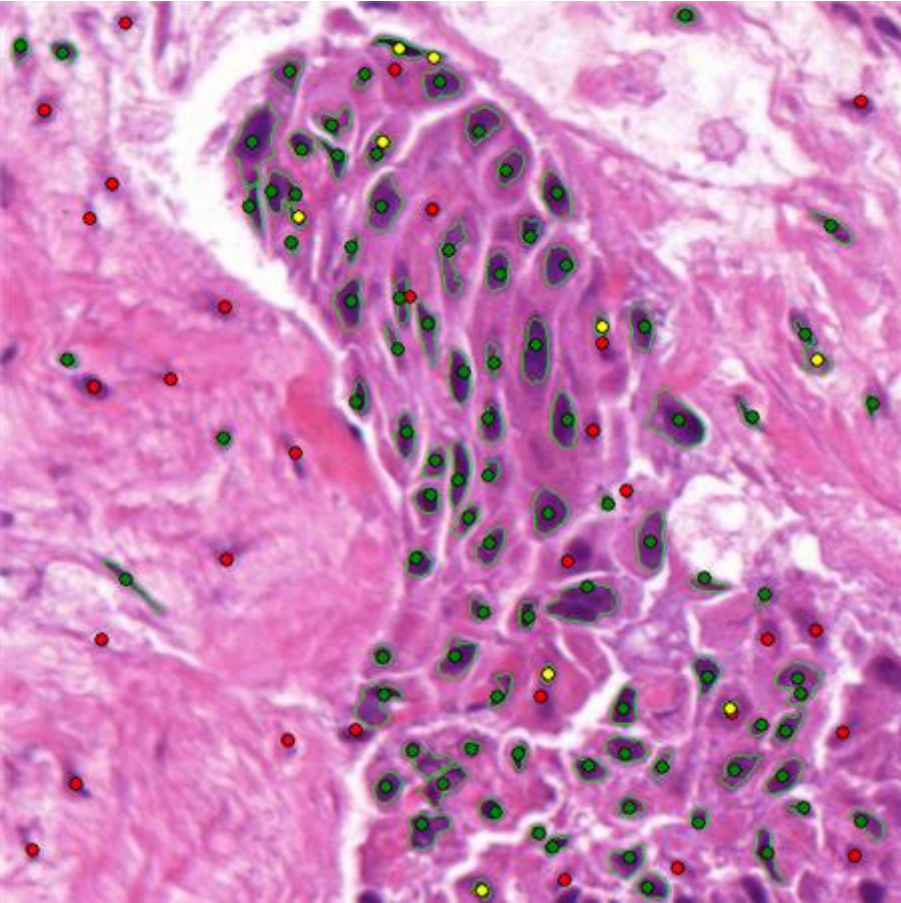

Wienert

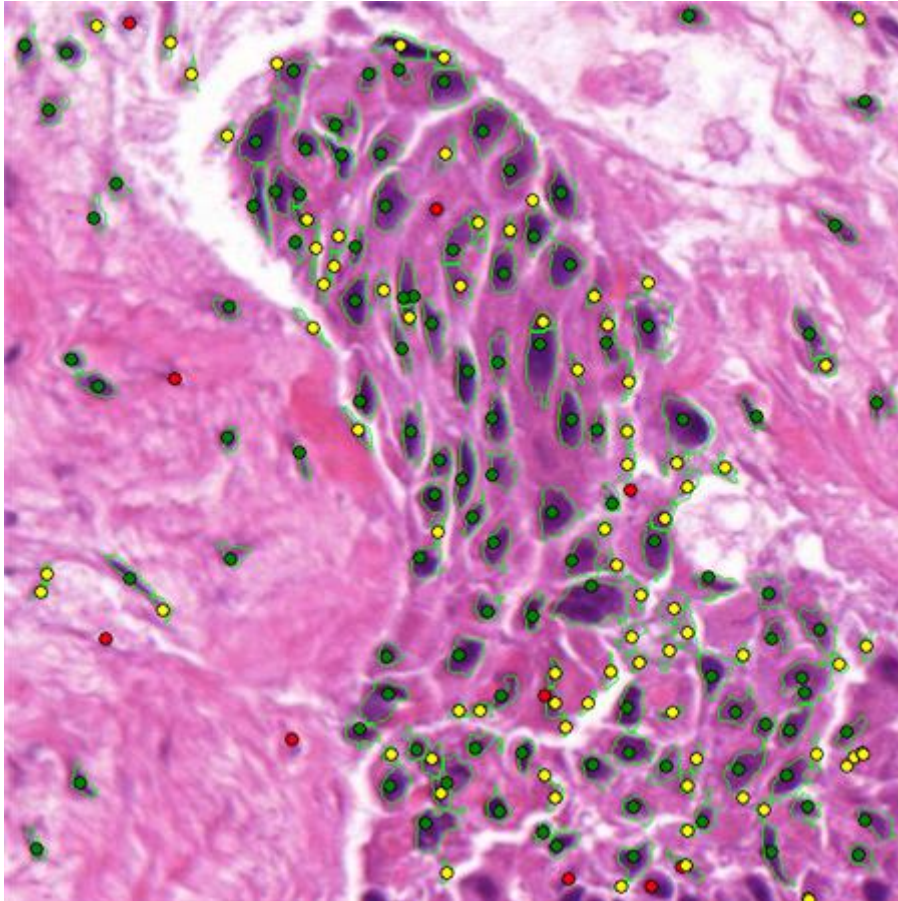

Al-Kofahi (optimized)

|                      | Wienert | Al-Kofahi (automatic) | Al-Kofahi (optimized) |
|----------------------|---------|-----------------------|-----------------------|
| nuclei               | 120     | 120                   | 120                   |
| true positive count  | 90      | 111                   | 110                   |
| false negative count | 30      | 9                     | 10                    |
| false positive count | 9       | 141                   | 78                    |
| precision            | 0,909   | 0,440                 | 0,585                 |
| recall               | 0,750   | 0,925                 | 0,917                 |
| conglomerate         | 0,978   | 0,973                 | 0,973                 |
| time(ms)             | 608     | 624                   | 1872                  |



7

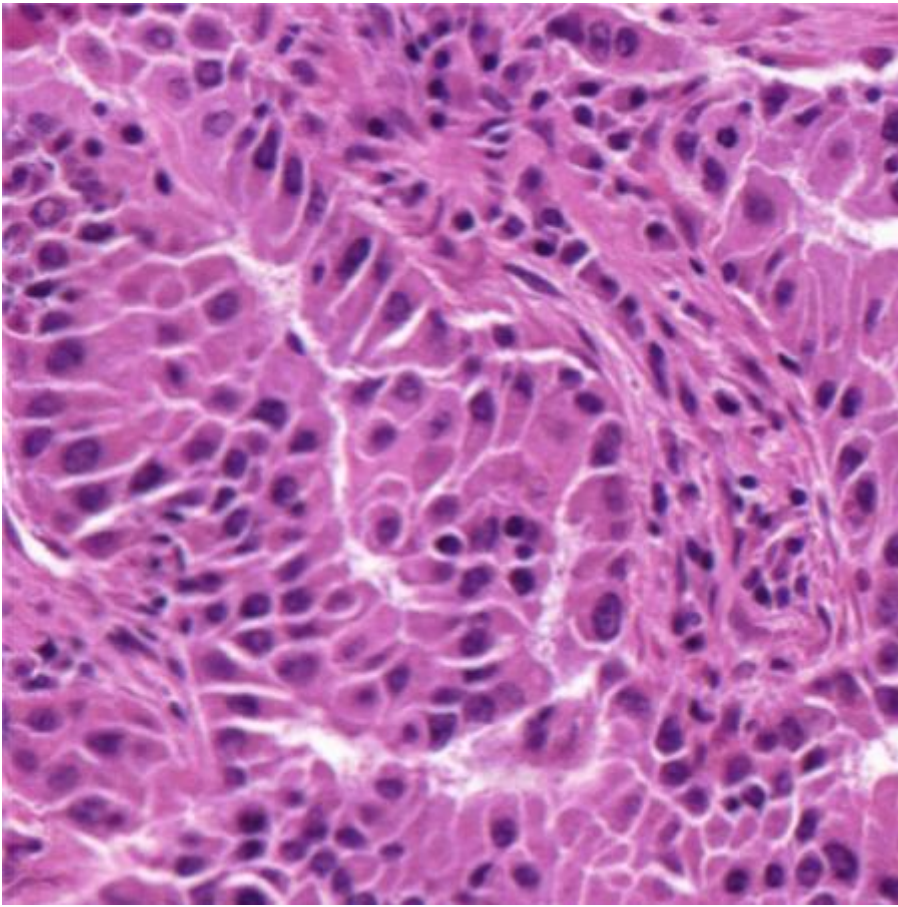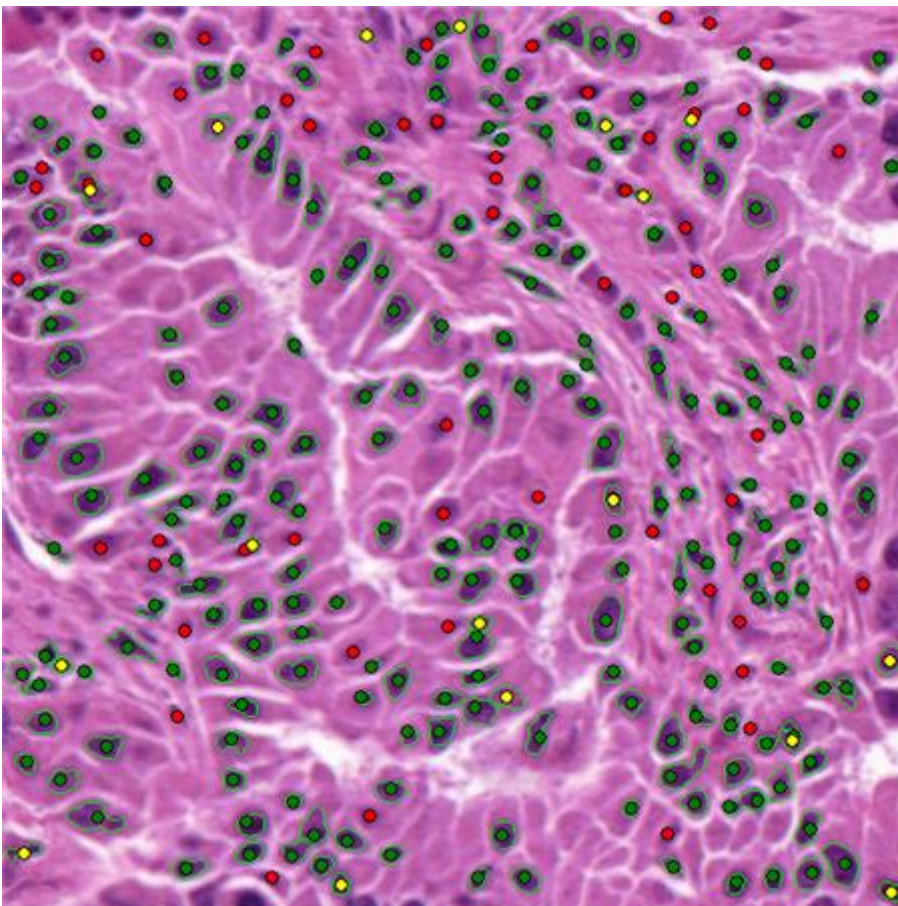

Wienert

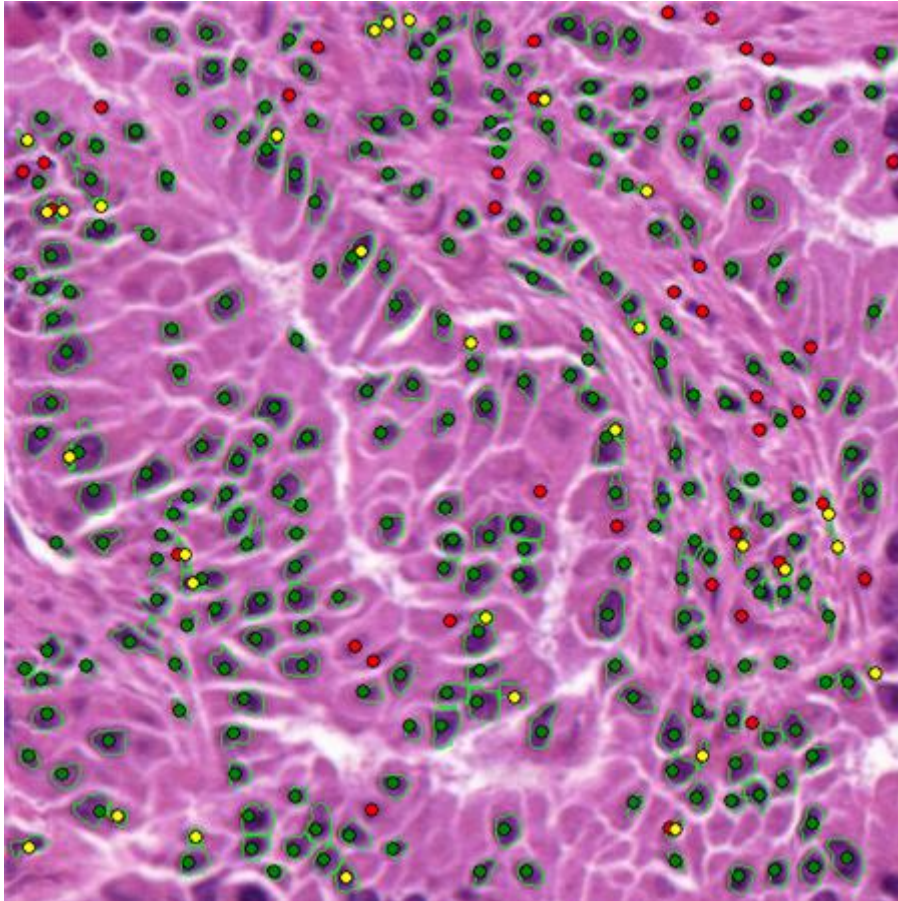

Al-Kofahi (optimized)

|                      | <b>Wienert</b> | <b>Al-Kofahi (automatic)</b> | <b>Al-Kofahi (optimized)</b> |
|----------------------|----------------|------------------------------|------------------------------|
| nuclei               | 287            | 287                          | 287                          |
| true positive count  | 231            | 249                          | 249                          |
| false negative count | 56             | 38                           | 38                           |
| false positive count | 17             | 54                           | 30                           |
| precision            | 0,931          | 0,822                        | 0,892                        |
| recall               | 0,805          | 0,868                        | 0,868                        |
| conglomerate         | 0,983          | 0,984                        | 0,984                        |
| time(ms)             | 639            | 748                          | 2137                         |

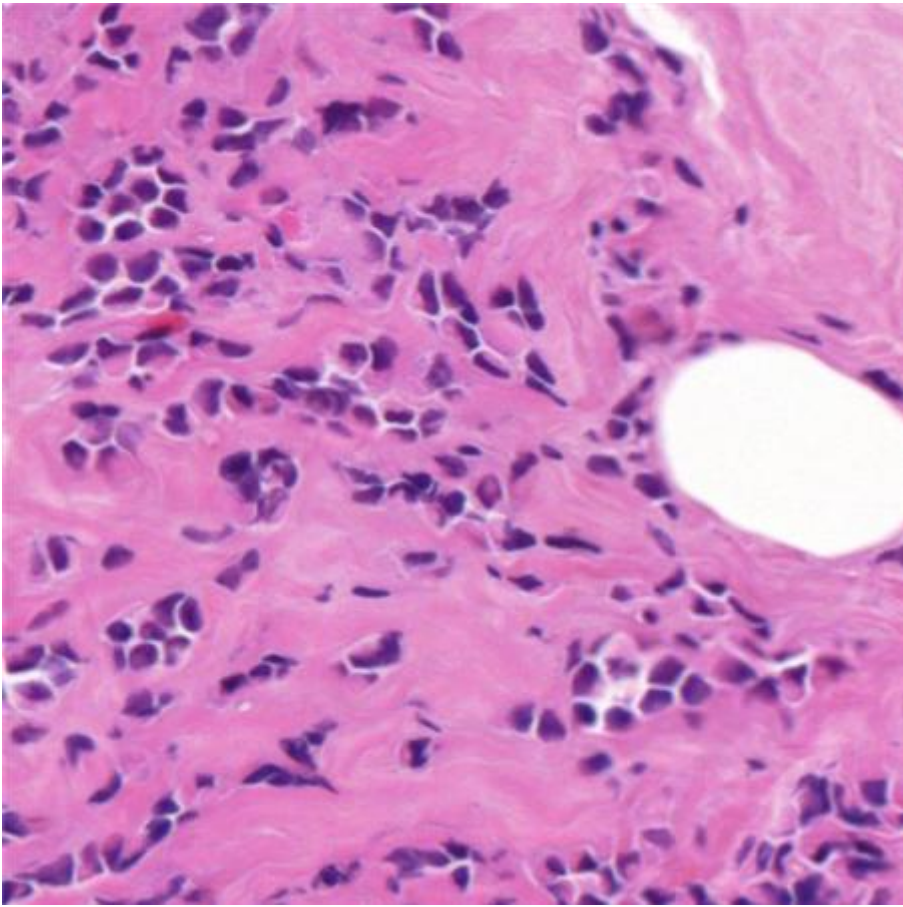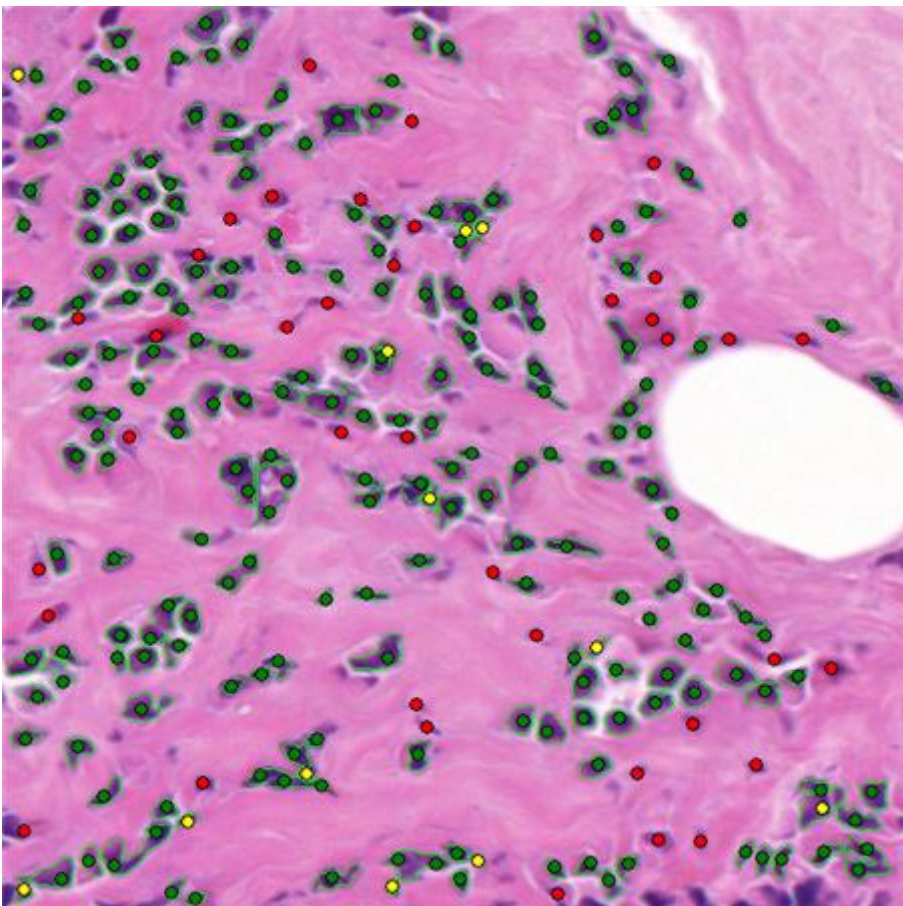

Wienert

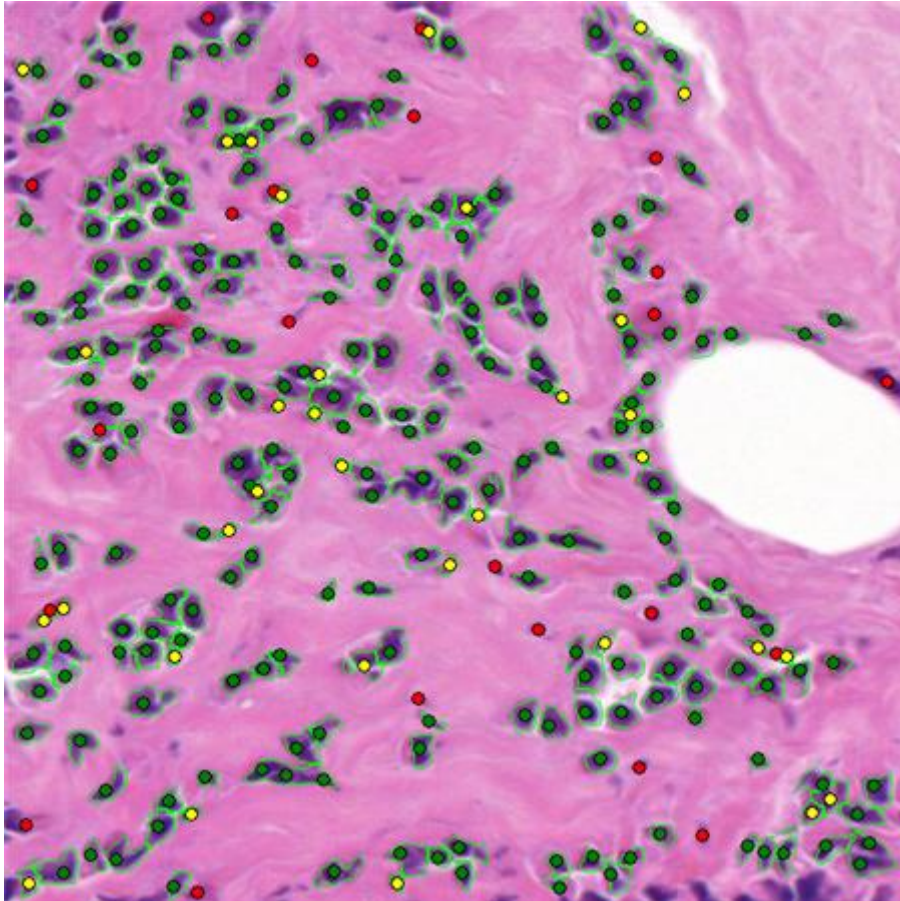

AI-Kofahi (optimized)

|                      | Wienert | AI-Kofahi (automatic) | AI-Kofahi (optimized) |
|----------------------|---------|-----------------------|-----------------------|
| nuclei               | 252     | 252                   | 252                   |
| true positive count  | 213     | 228                   | 229                   |
| false negative count | 39      | 24                    | 23                    |
| false positive count | 12      | 84                    | 33                    |
| precision            | 0,947   | 0,731                 | 0,874                 |
| recall               | 0,845   | 0,905                 | 0,909                 |
| conglomerate         | 0,906   | 0,917                 | 0,913                 |
| time(ms)             | 717     | 655                   | 1872                  |

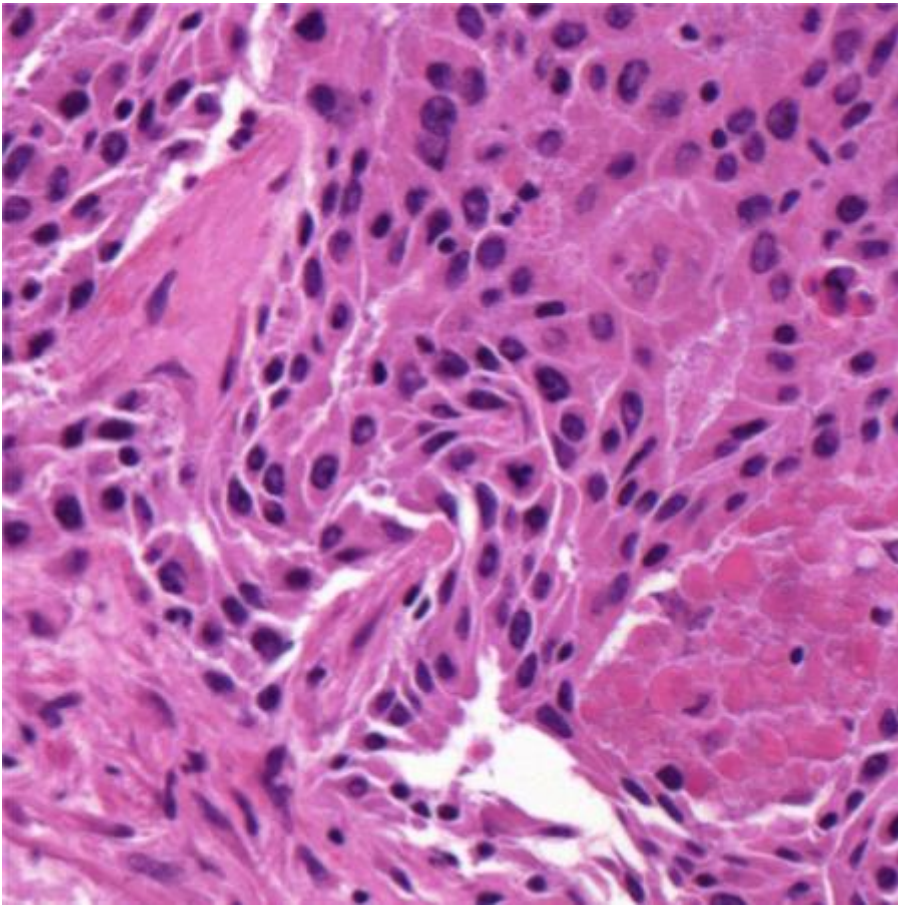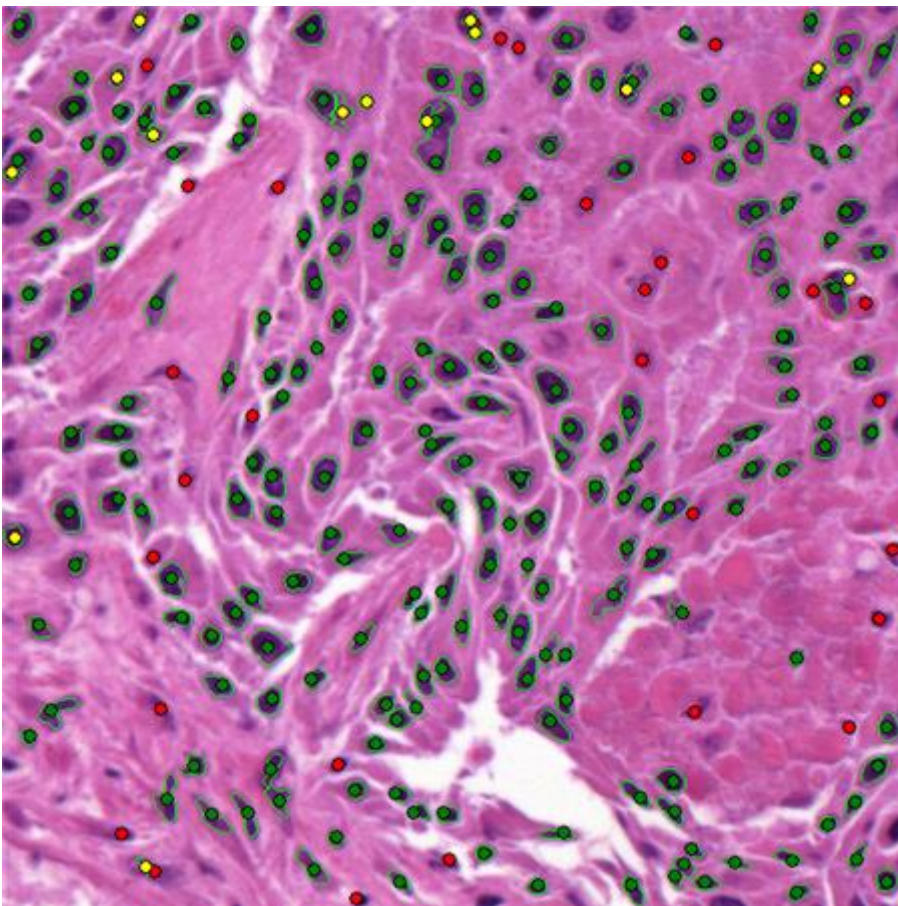

Wienert

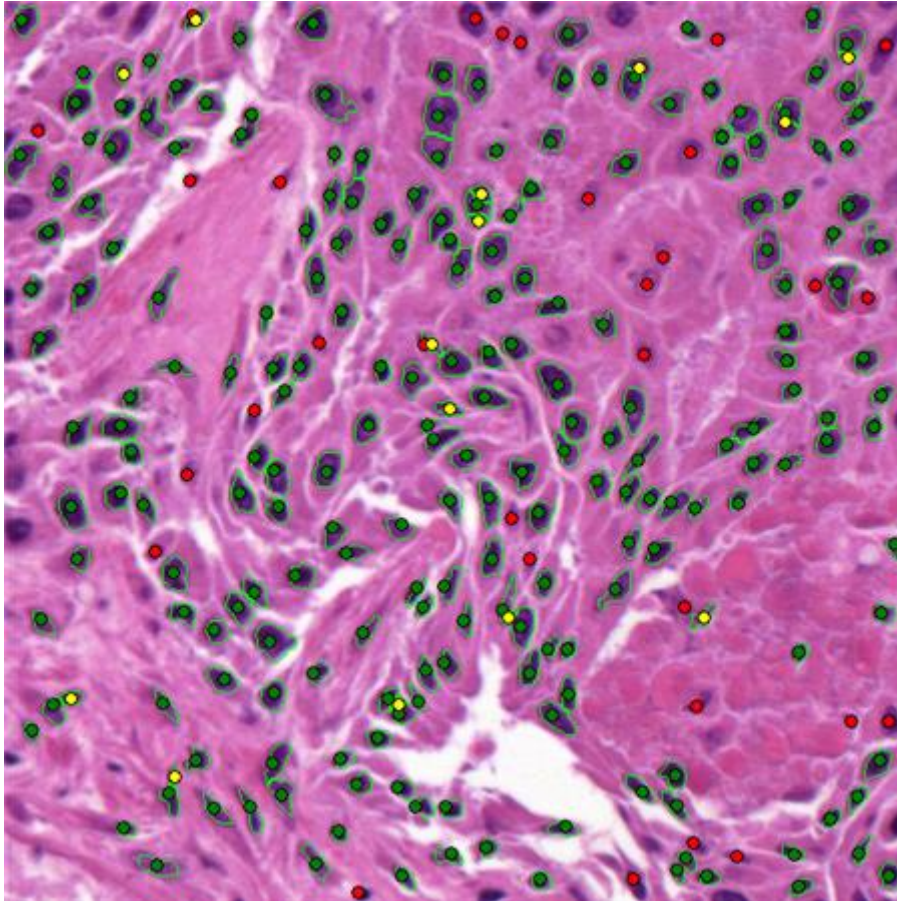

Al-Kofahi (optimized)

|                      | <b>Wienert</b> | <b>Al-Kofahi (automatic)</b> | <b>Al-Kofahi (optimized)</b> |
|----------------------|----------------|------------------------------|------------------------------|
| nuclei               | 245            | 245                          | 245                          |
| true positive count  | 214            | 213                          | 214                          |
| false negative count | 31             | 32                           | 31                           |
| false positive count | 15             | 37                           | 14                           |
| precision            | 0,934          | 0,852                        | 0,939                        |
| recall               | 0,873          | 0,869                        | 0,873                        |
| conglomerate         | 0,986          | 0,972                        | 0,981                        |
| time(ms)             | 686            | 608                          | 1825                         |

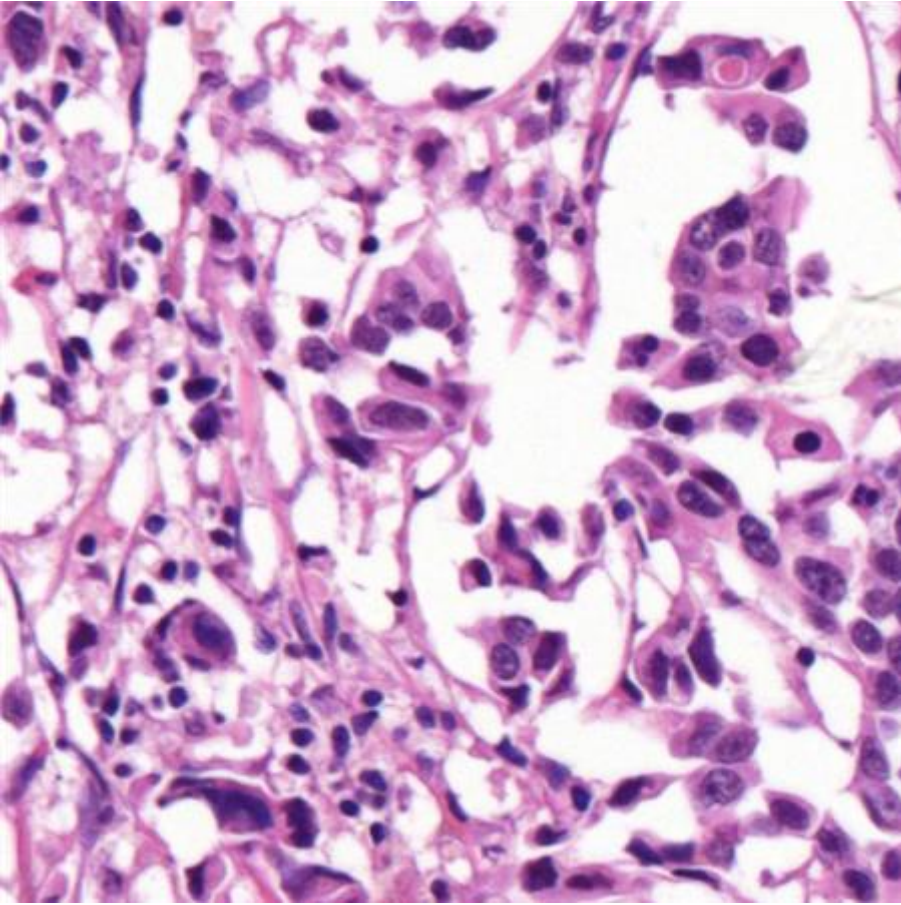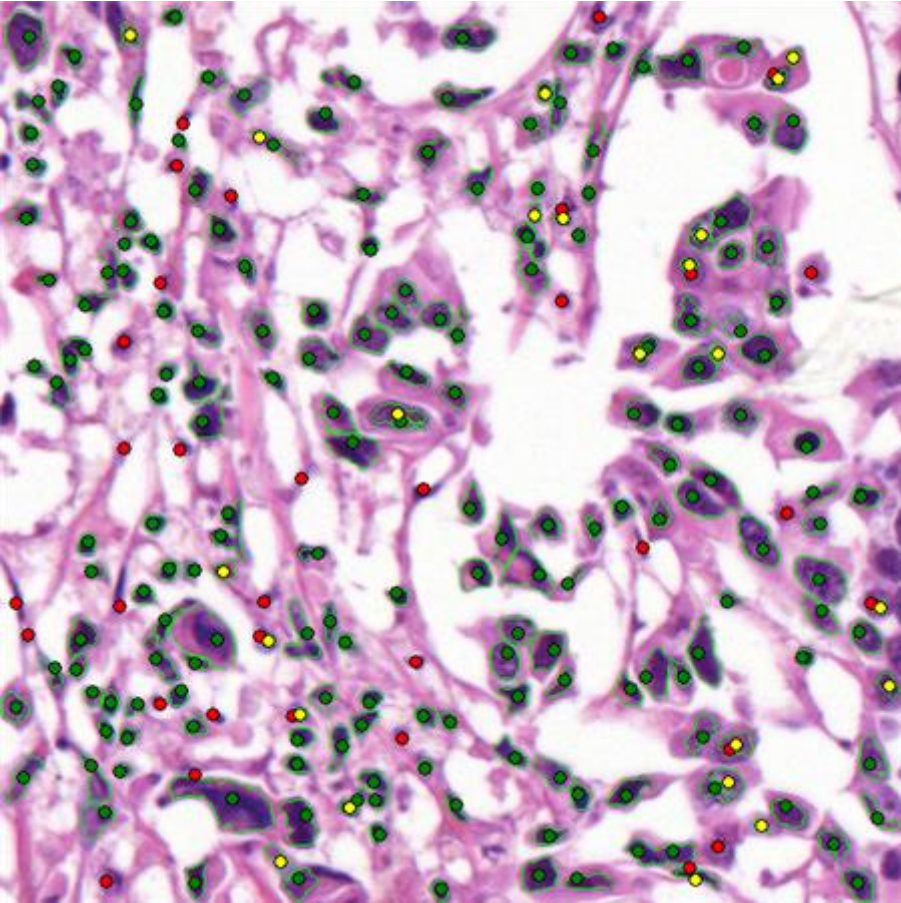

Wienert

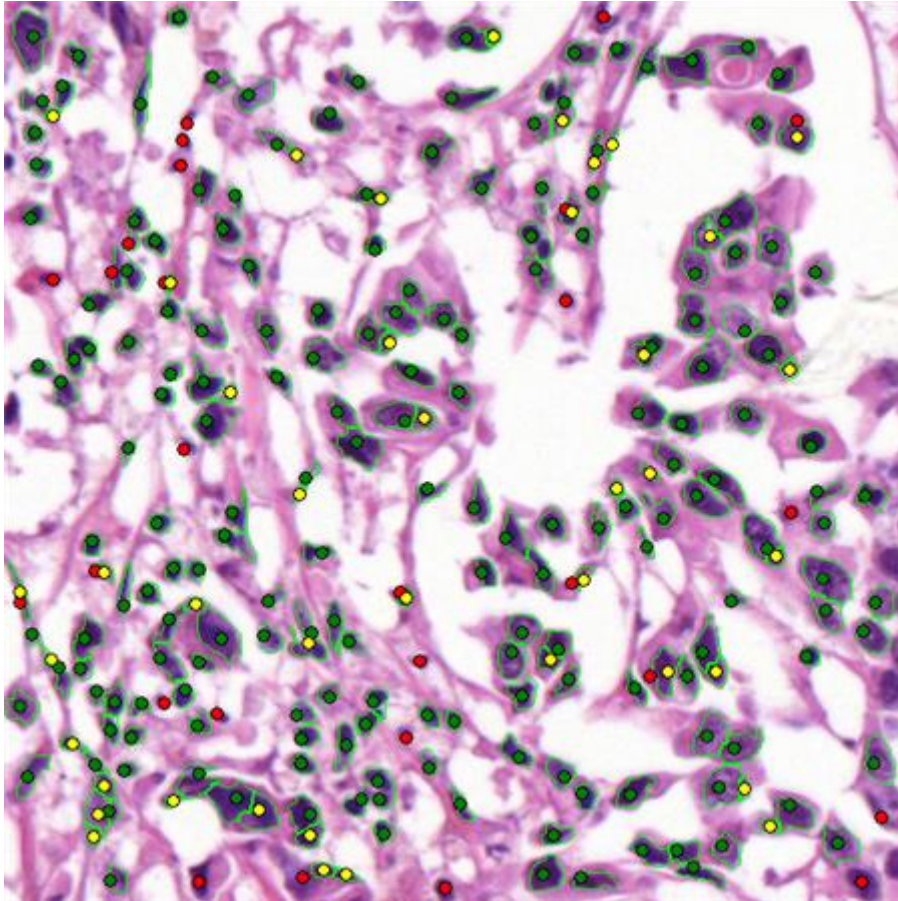

AI-Kofahi (optimized)

|                      | <b>Wienert</b> | <b>AI-Kofahi (automatic)</b> | <b>AI-Kofahi (optimized)</b> |
|----------------------|----------------|------------------------------|------------------------------|
| nuclei               | 213            | 213                          | 213                          |
| true positive count  | 180            | 186                          | 186                          |
| false negative count | 33             | 27                           | 27                           |
| false positive count | 23             | 59                           | 41                           |
| precision            | 0,887          | 0,759                        | 0,819                        |
| recall               | 0,845          | 0,873                        | 0,873                        |
| conglomerate         | 0,956          | 0,989                        | 0,989                        |
| time(ms)             | 764            | 702                          | 1825                         |



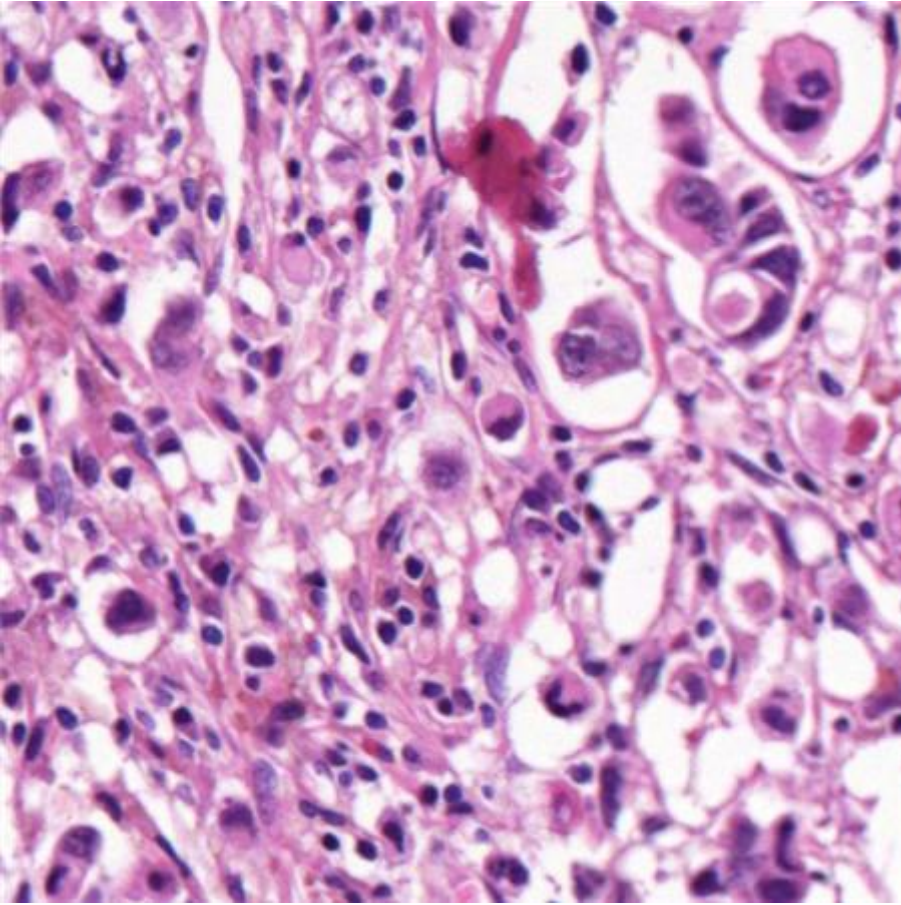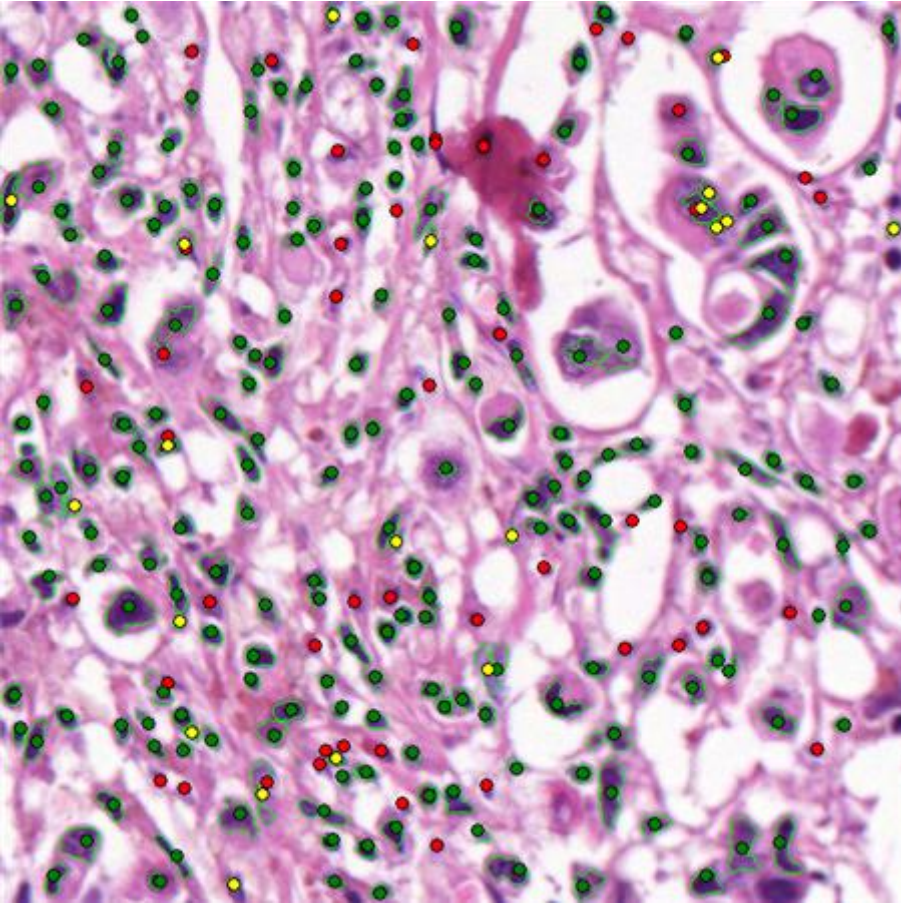

Wienert

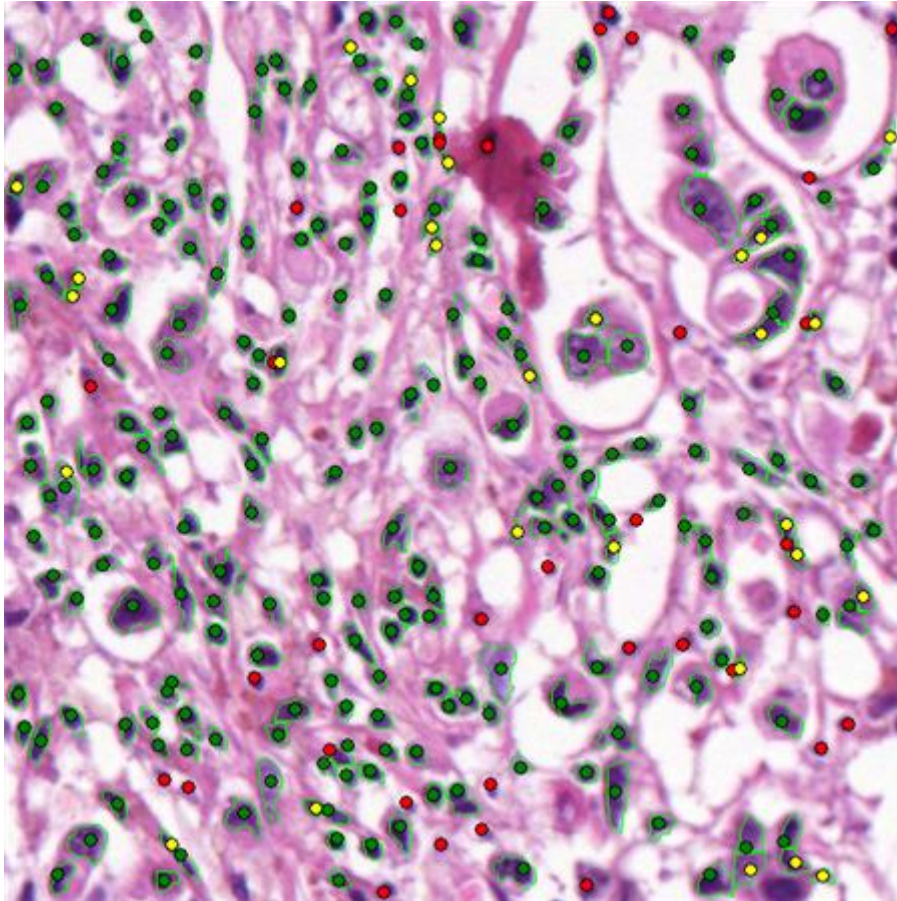

AI-Kofahi (optimized)

|                      | <b>Wienert</b> | <b>AI-Kofahi (automatic)</b> | <b>AI-Kofahi (optimized)</b> |
|----------------------|----------------|------------------------------|------------------------------|
| nuclei               | 257            | 257                          | 257                          |
| true positive count  | 208            | 224                          | 221                          |
| false negative count | 49             | 33                           | 36                           |
| false positive count | 20             | 56                           | 29                           |
| precision            | 0,912          | 0,800                        | 0,884                        |
| recall               | 0,809          | 0,872                        | 0,860                        |
| conglomerate         | 0,976          | 0,969                        | 0,973                        |
| time(ms)             | 733            | 639                          | 1950                         |

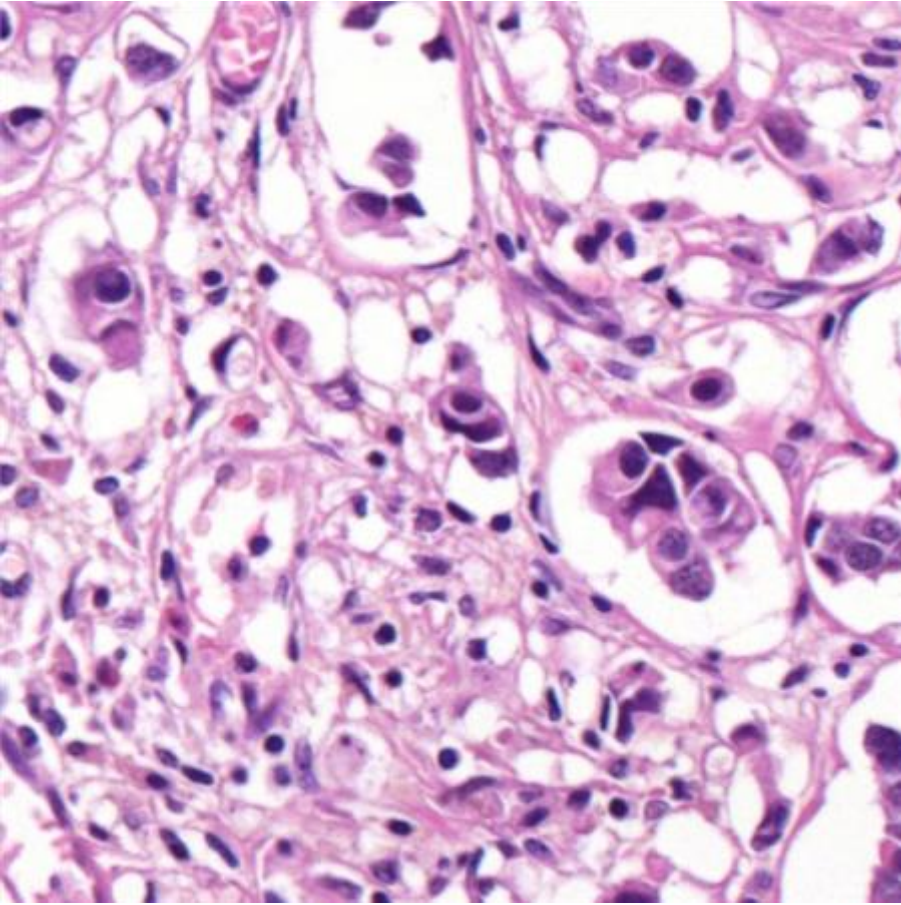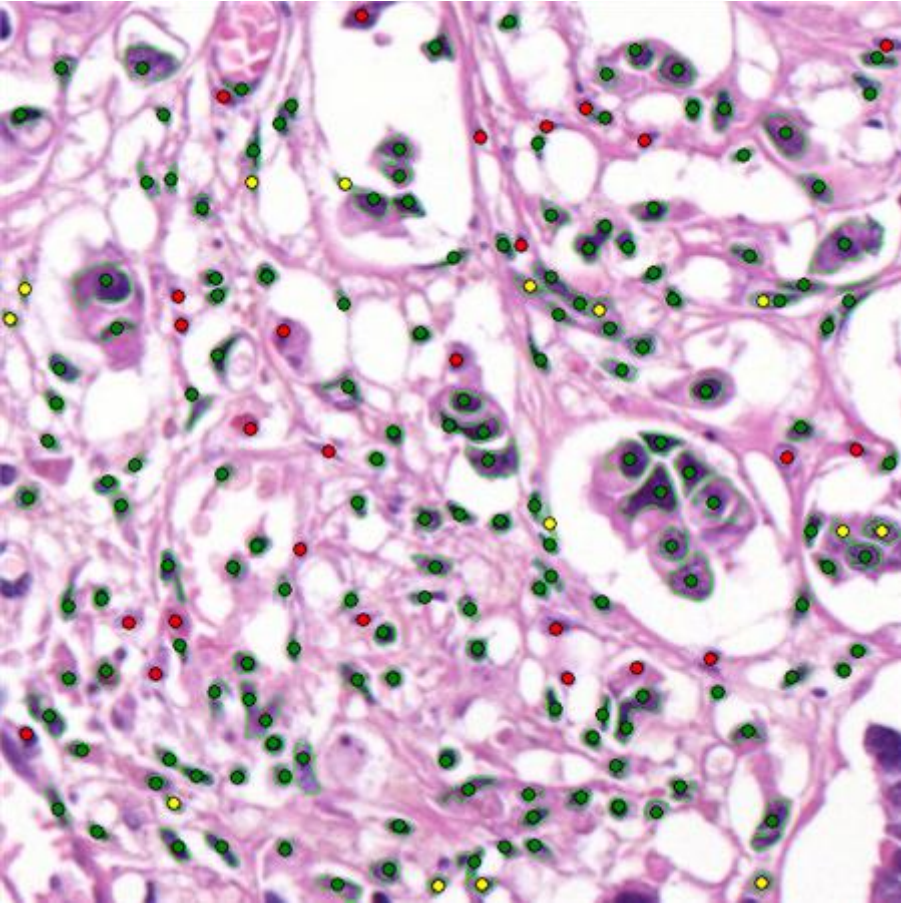

Wienert

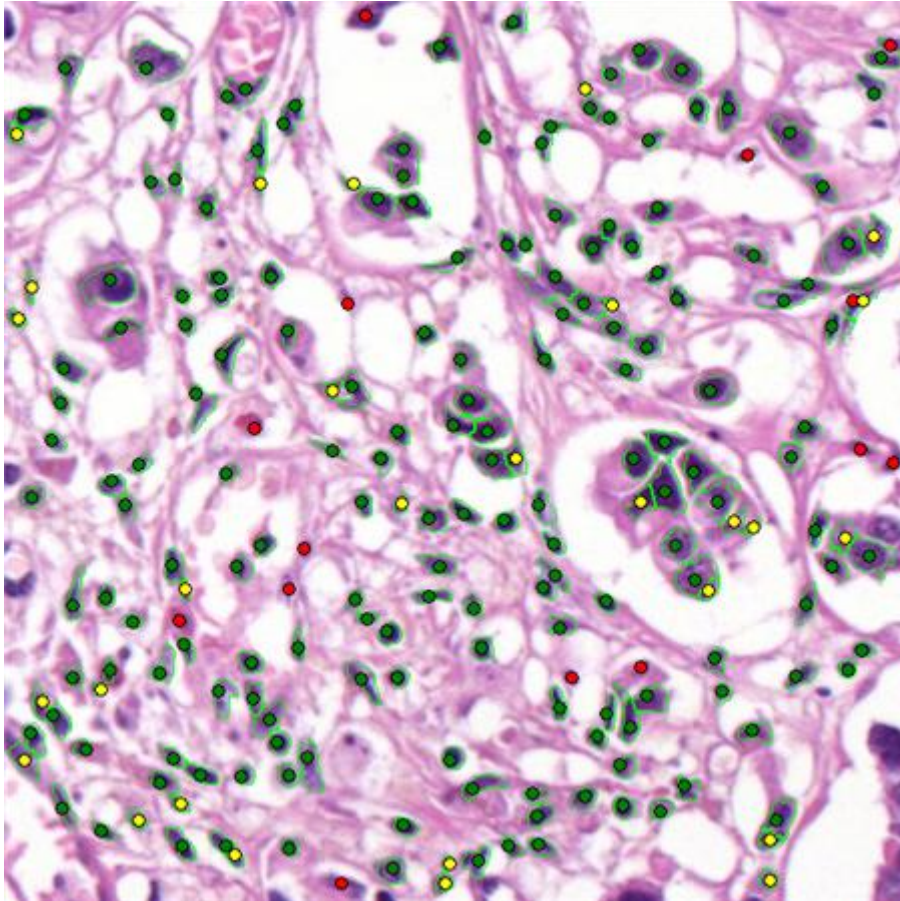

Al-Kofahi (optimized)

|                      | <b>Wienert</b> | <b>Al-Kofahi (automatic)</b> | <b>Al-Kofahi (optimized)</b> |
|----------------------|----------------|------------------------------|------------------------------|
| nuclei               | 186            | 186                          | 186                          |
| true positive count  | 160            | 170                          | 172                          |
| false negative count | 26             | 16                           | 14                           |
| false positive count | 14             | 51                           | 28                           |
| precision            | 0,920          | 0,769                        | 0,860                        |
| recall               | 0,860          | 0,914                        | 0,925                        |
| conglomerate         | 0,950          | 0,947                        | 0,953                        |
| time(ms)             | 608            | 764                          | 1762                         |

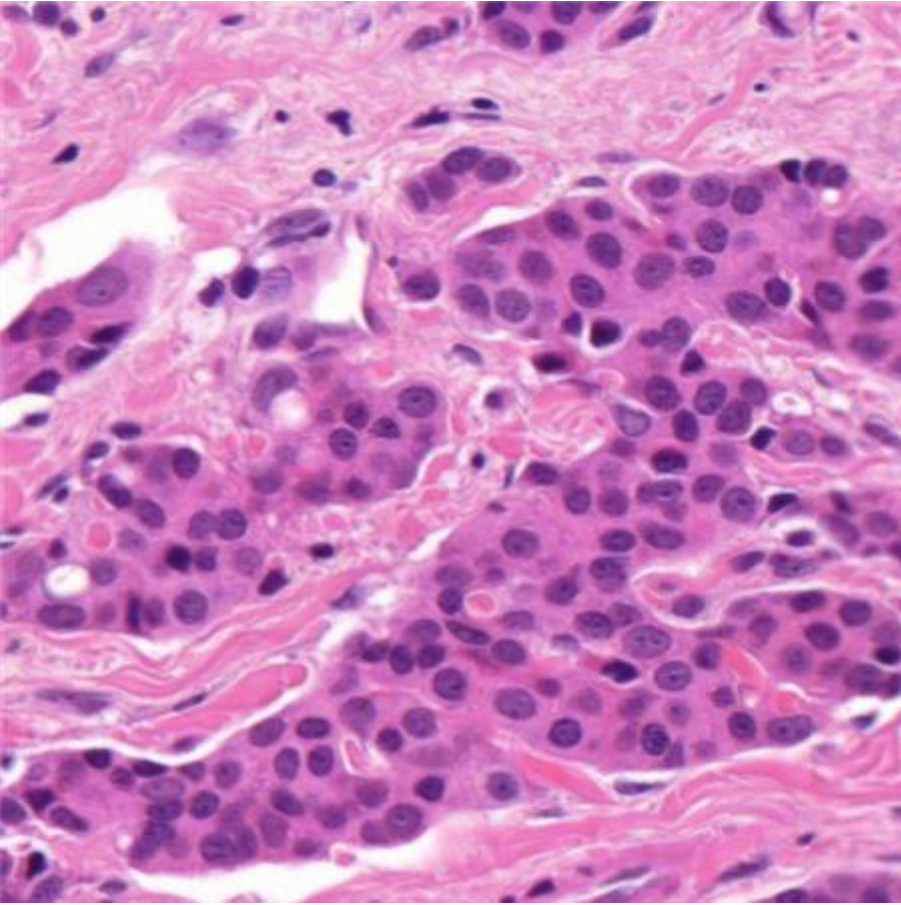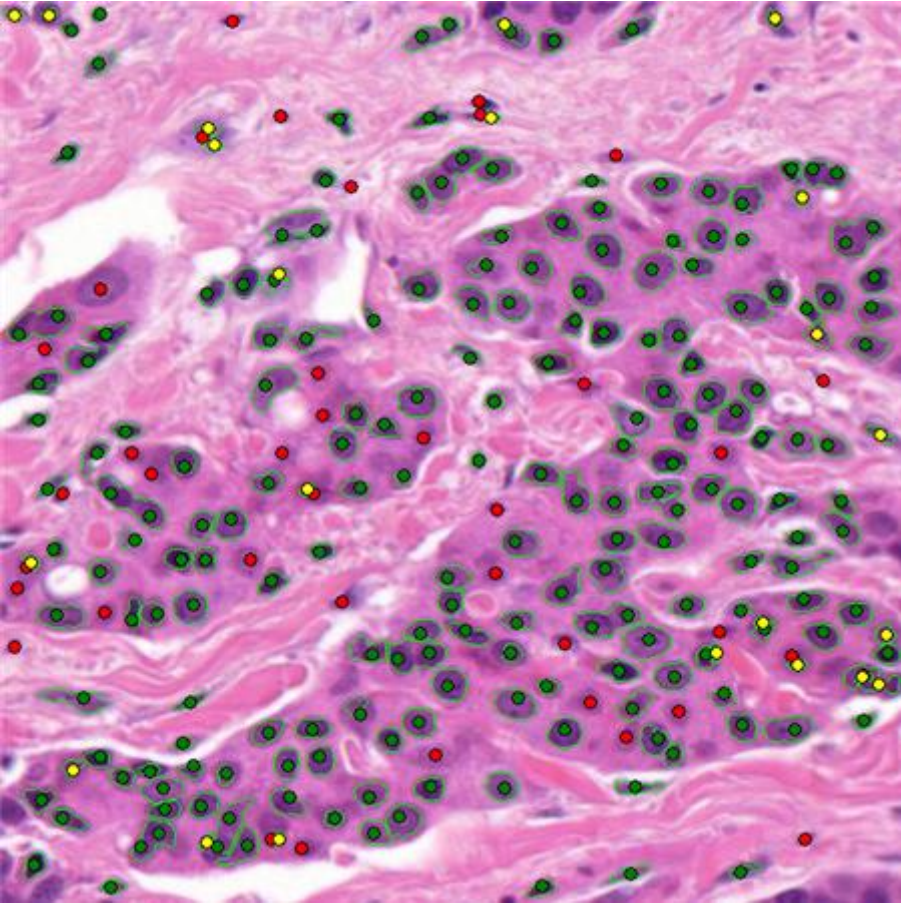

Wienert

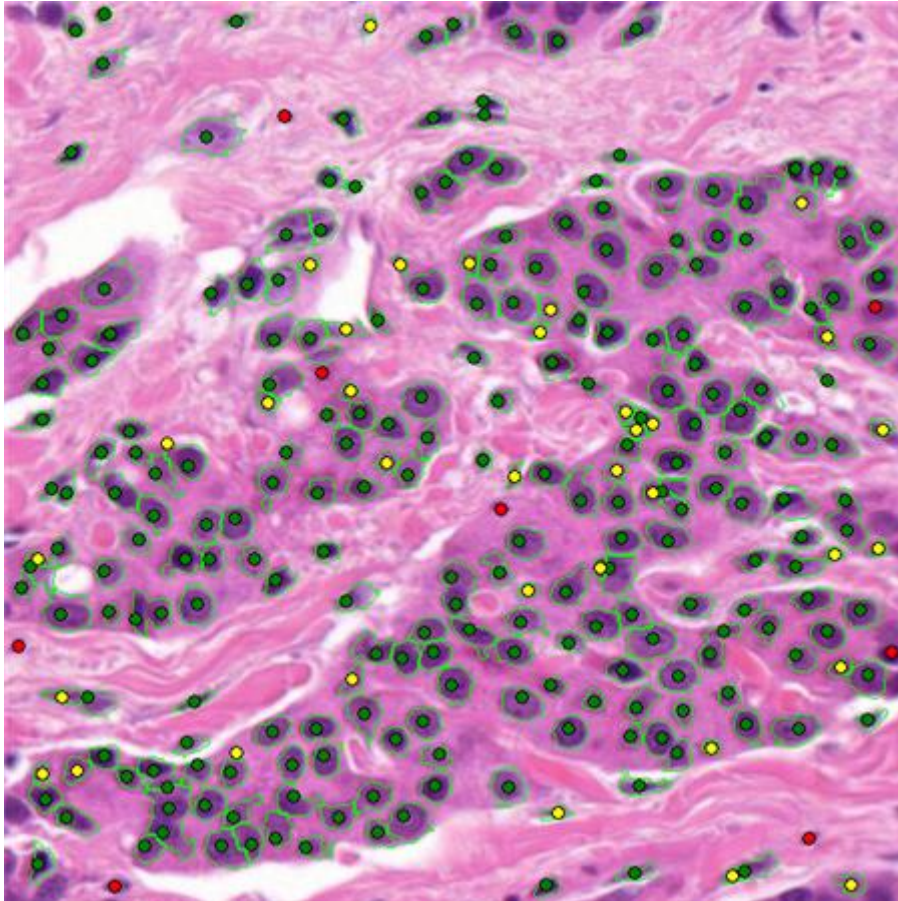

AI-Kofahi (optimized)

|                      | Wienert | AI-Kofahi (automatic) | AI-Kofahi (optimized) |
|----------------------|---------|-----------------------|-----------------------|
| nuclei               | 236     | 236                   | 236                   |
| true positive count  | 197     | 228                   | 228                   |
| false negative count | 39      | 8                     | 8                     |
| false positive count | 22      | 94                    | 35                    |
| precision            | 0,900   | 0,708                 | 0,867                 |
| recall               | 0,835   | 0,966                 | 0,966                 |
| conglomerate         | 0,939   | 0,956                 | 0,961                 |
| time(ms)             | 748     | 639                   | 1981                  |

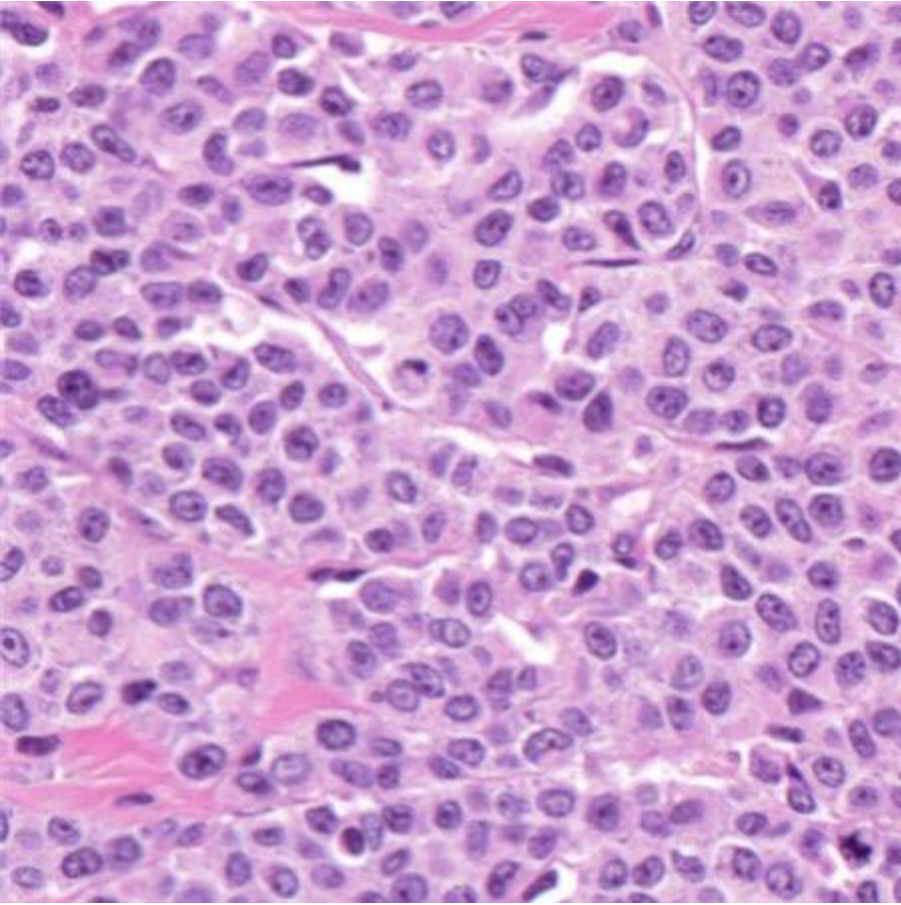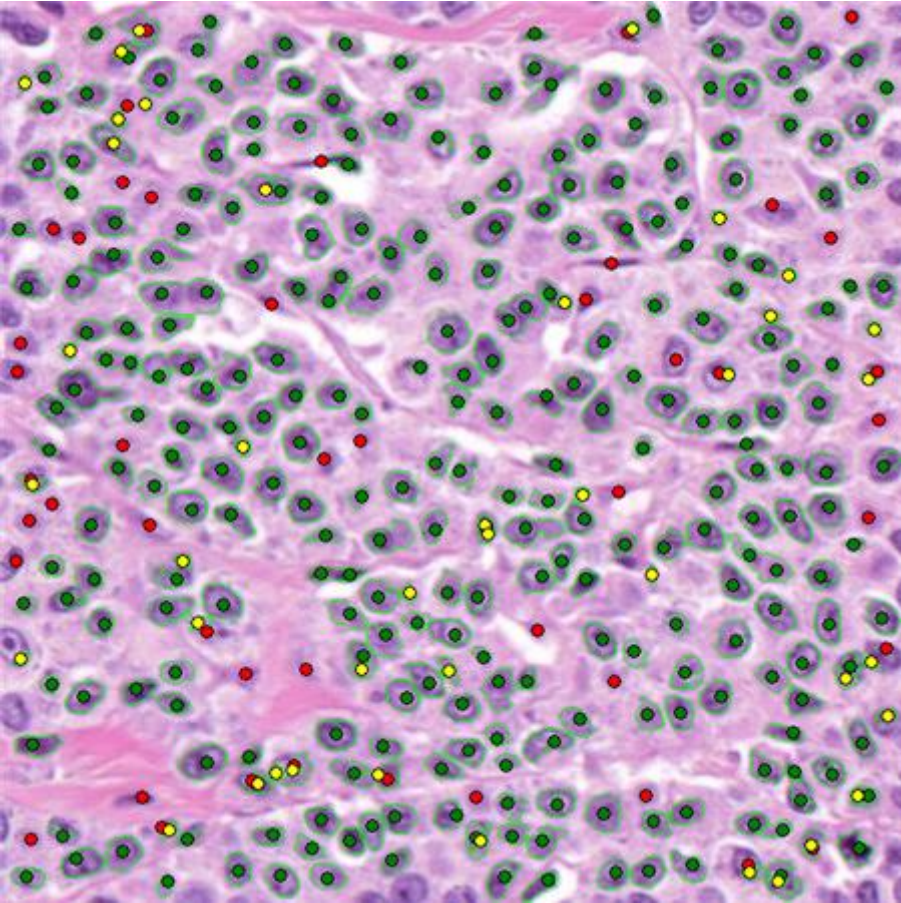

Wienert

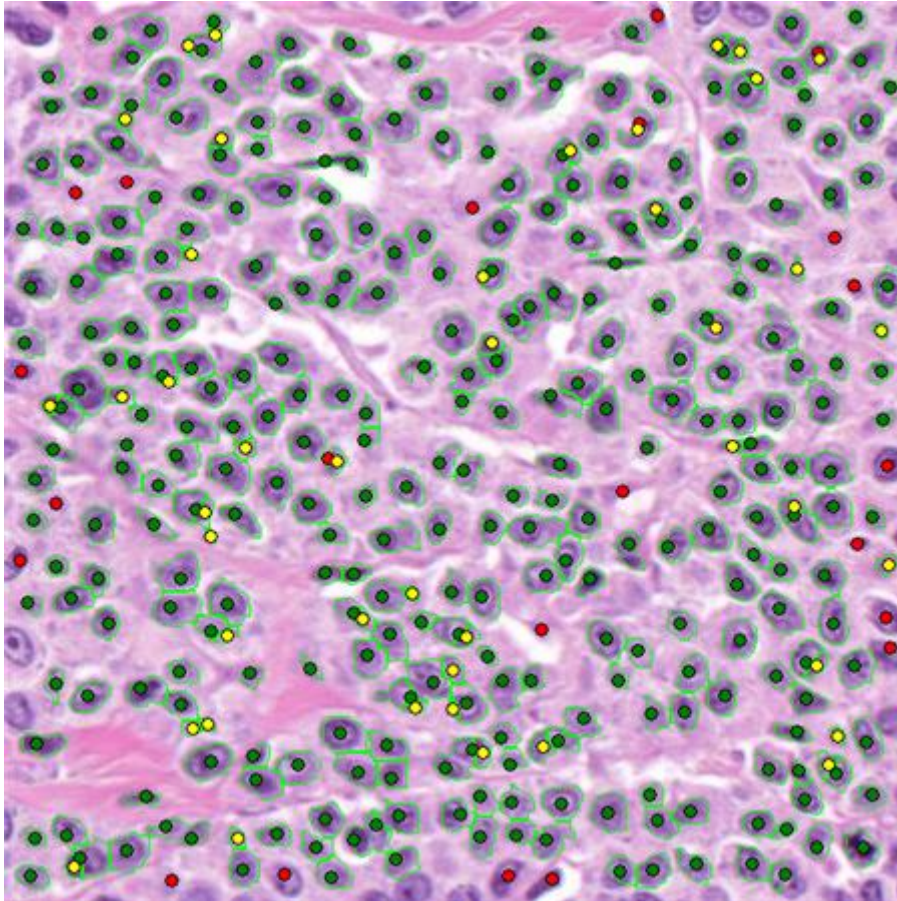

AI-Kofahi (optimized)

|                      | <b>Wienert</b> | <b>AI-Kofahi (automatic)</b> | <b>AI-Kofahi (optimized)</b> |
|----------------------|----------------|------------------------------|------------------------------|
| nuclei               | 329            | 329                          | 329                          |
| true positive count  | 281            | 308                          | 307                          |
| false negative count | 48             | 21                           | 22                           |
| false positive count | 41             | 54                           | 43                           |
| precision            | 0,873          | 0,851                        | 0,877                        |
| recall               | 0,854          | 0,936                        | 0,933                        |
| conglomerate         | 0,968          | 0,981                        | 0,984                        |
| time(ms)             | 1092           | 717                          | 2371                         |



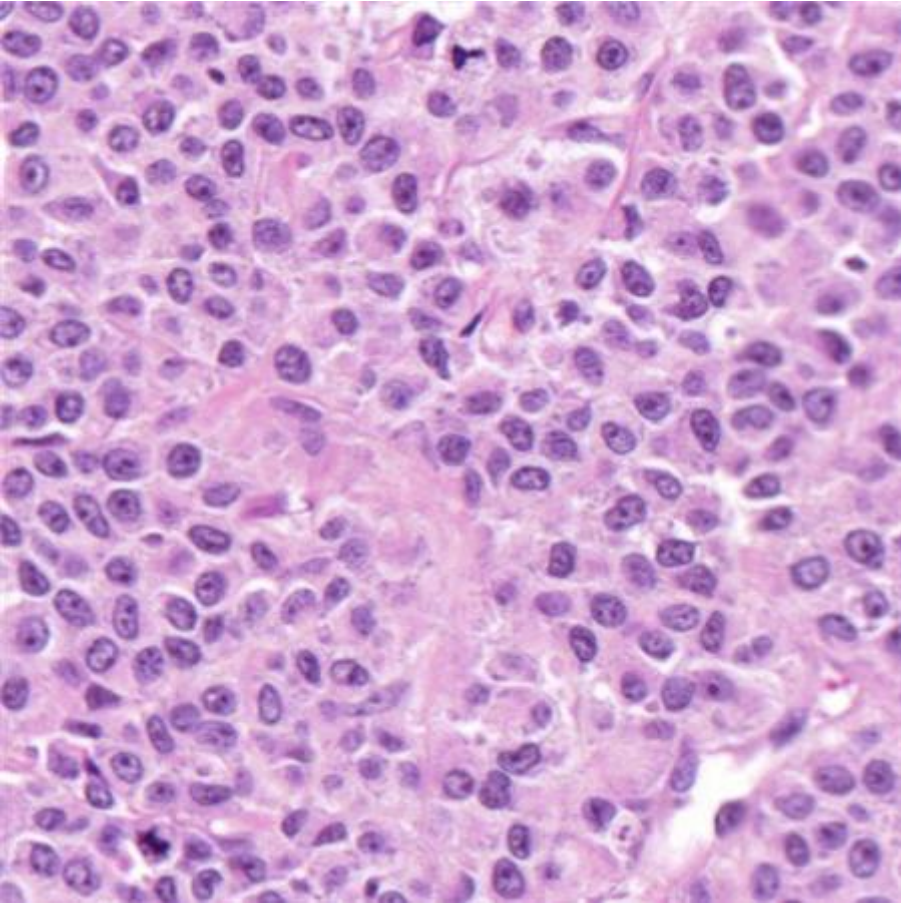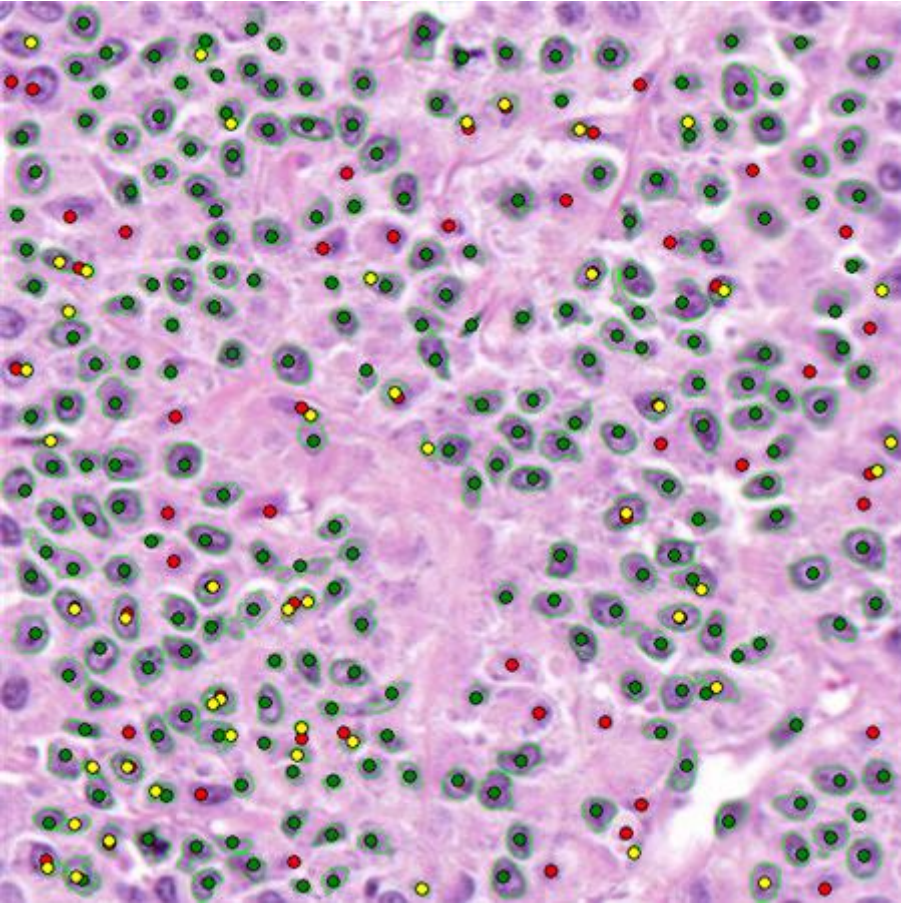

Wienert

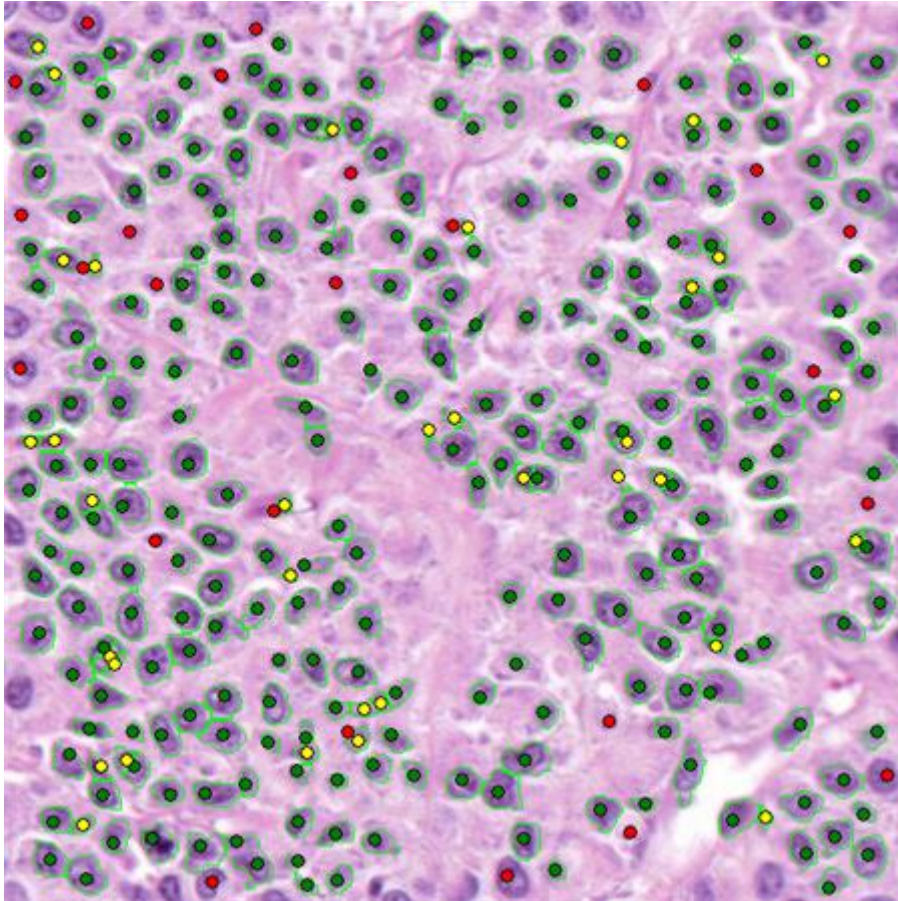

Al-Kofahi (optimized)

|                      | Wienert | Al-Kofahi (automatic) | Al-Kofahi (optimized) |
|----------------------|---------|-----------------------|-----------------------|
| nuclei               | 284     | 284                   | 284                   |
| true positive count  | 228     | 259                   | 259                   |
| false negative count | 56      | 25                    | 25                    |
| false positive count | 47      | 49                    | 35                    |
| precision            | 0,829   | 0,841                 | 0,881                 |
| recall               | 0,803   | 0,912                 | 0,912                 |
| conglomerate         | 0,969   | 0,988                 | 0,988                 |
| time(ms)             | 920     | 733                   | 2184                  |

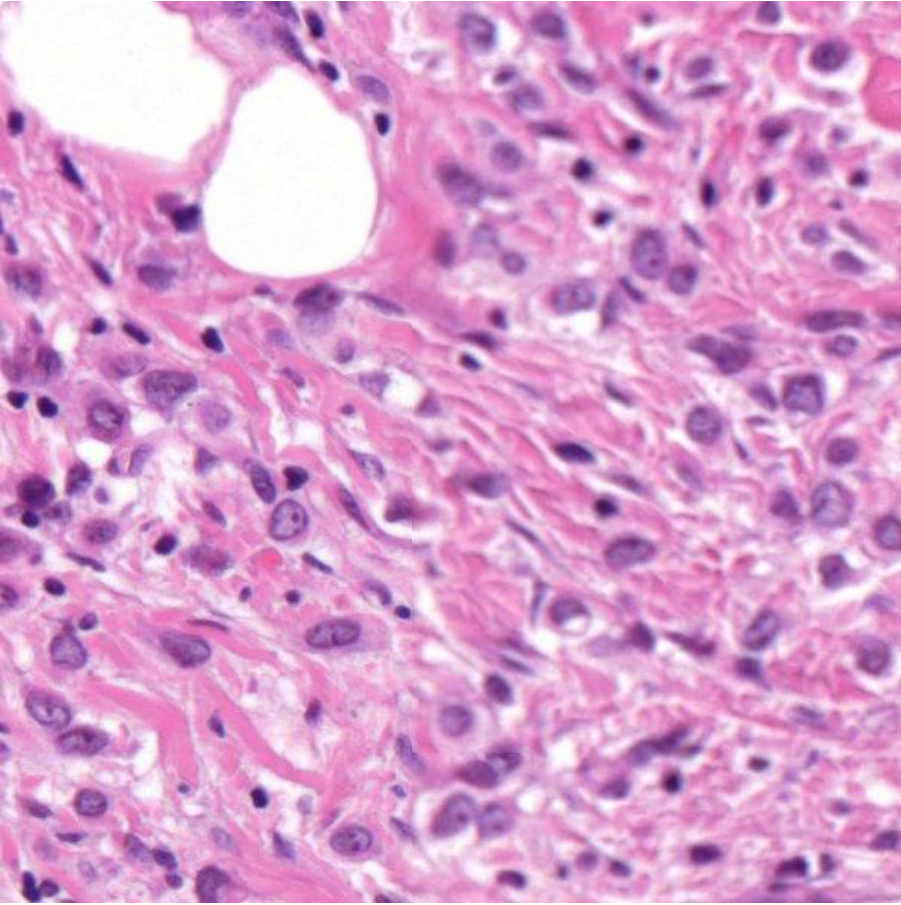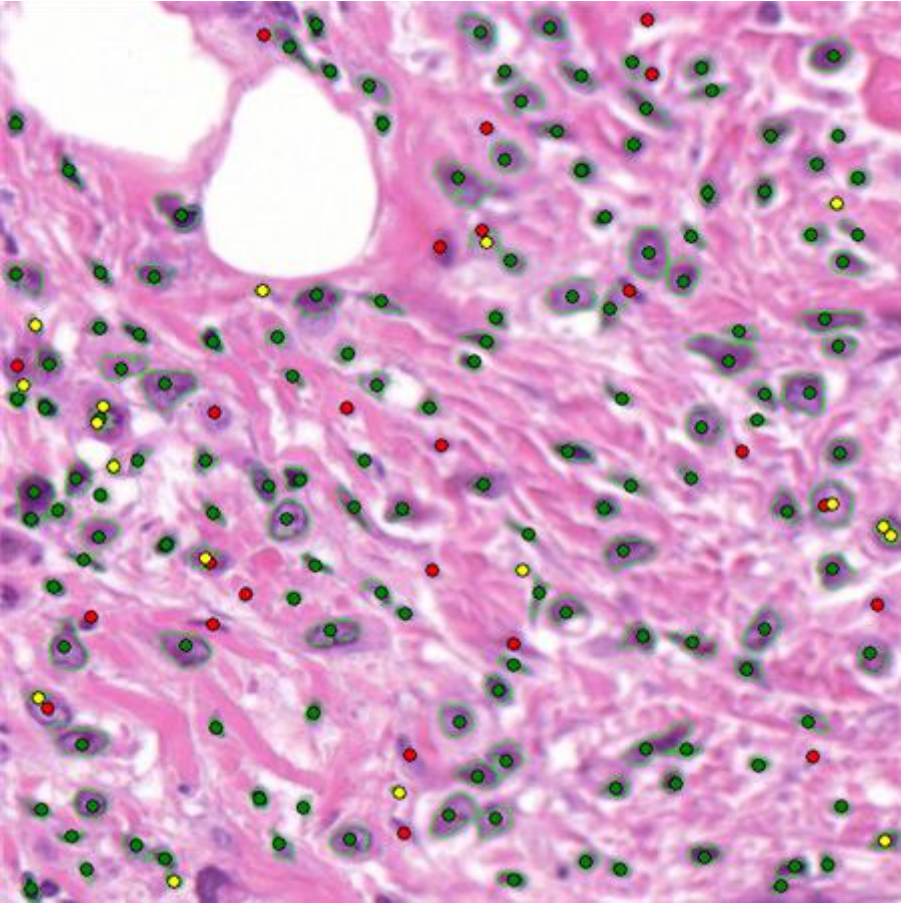

Wienert

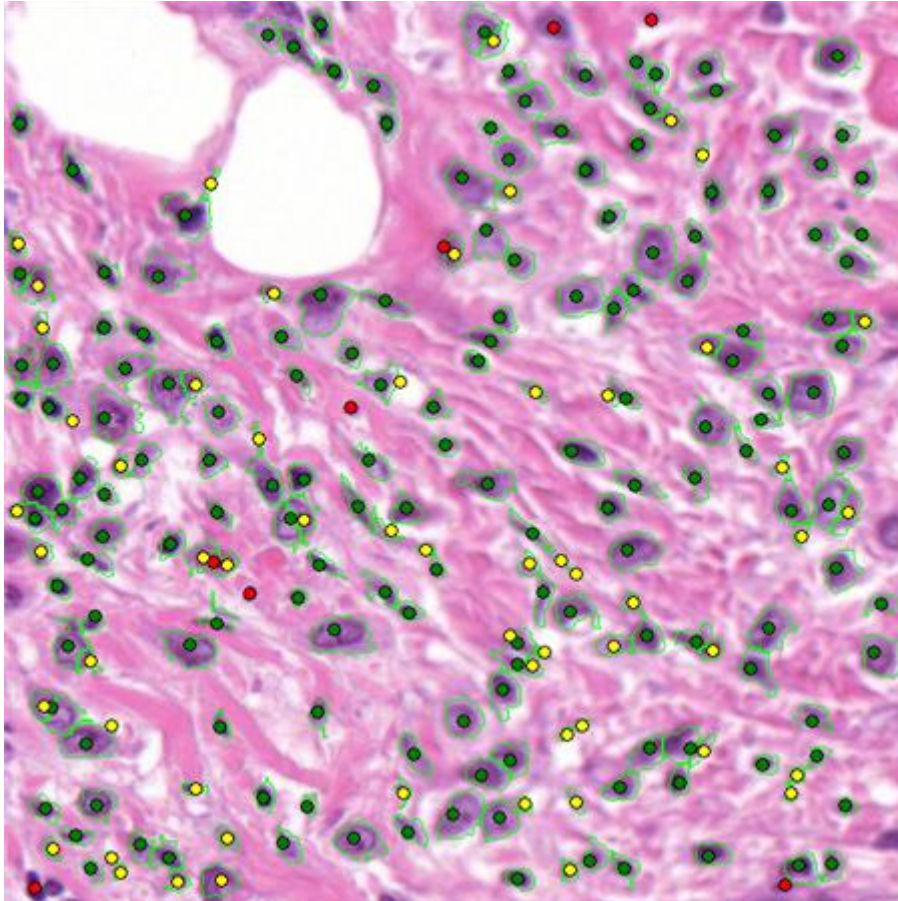

AI-Kofahi (optimized)

|                      | <b>Wienert</b> | <b>AI-Kofahi (automatic)</b> | <b>AI-Kofahi (optimized)</b> |
|----------------------|----------------|------------------------------|------------------------------|
| nuclei               | 171            | 171                          | 171                          |
| true positive count  | 147            | 161                          | 163                          |
| false negative count | 24             | 10                           | 8                            |
| false positive count | 17             | 103                          | 57                           |
| precision            | 0,896          | 0,610                        | 0,741                        |
| recall               | 0,860          | 0,942                        | 0,953                        |
| conglomerate         | 0,993          | 0,994                        | 0,988                        |
| time(ms)             | 686            | 655                          | 1872                         |

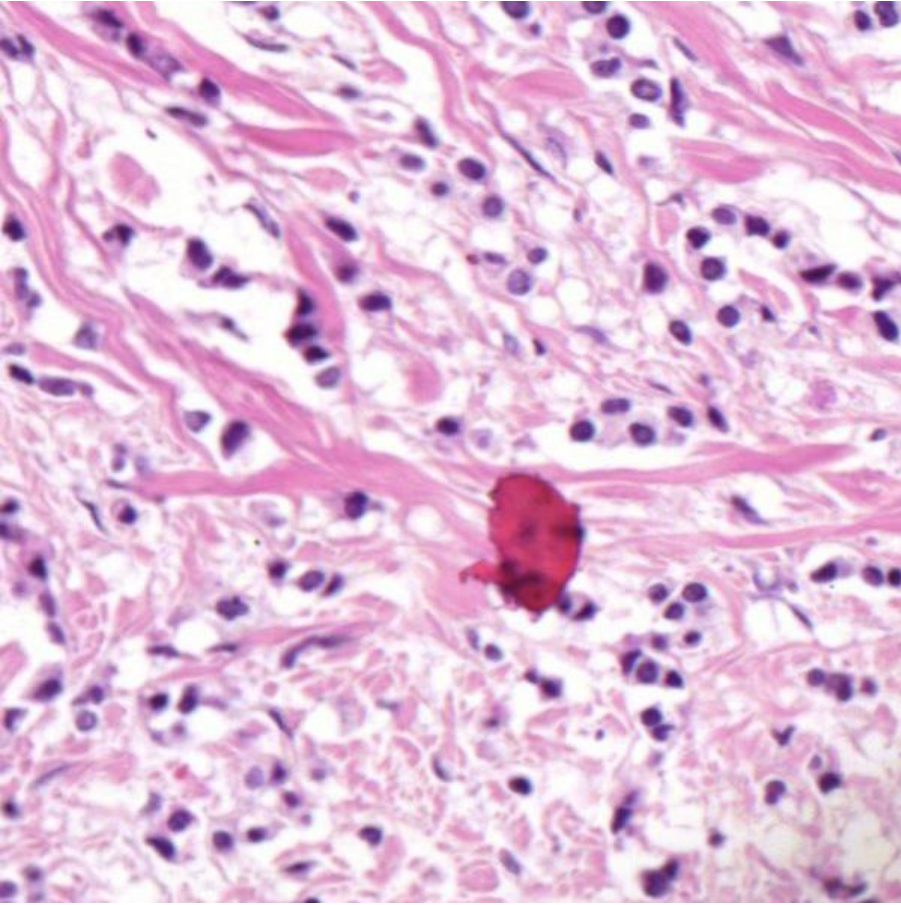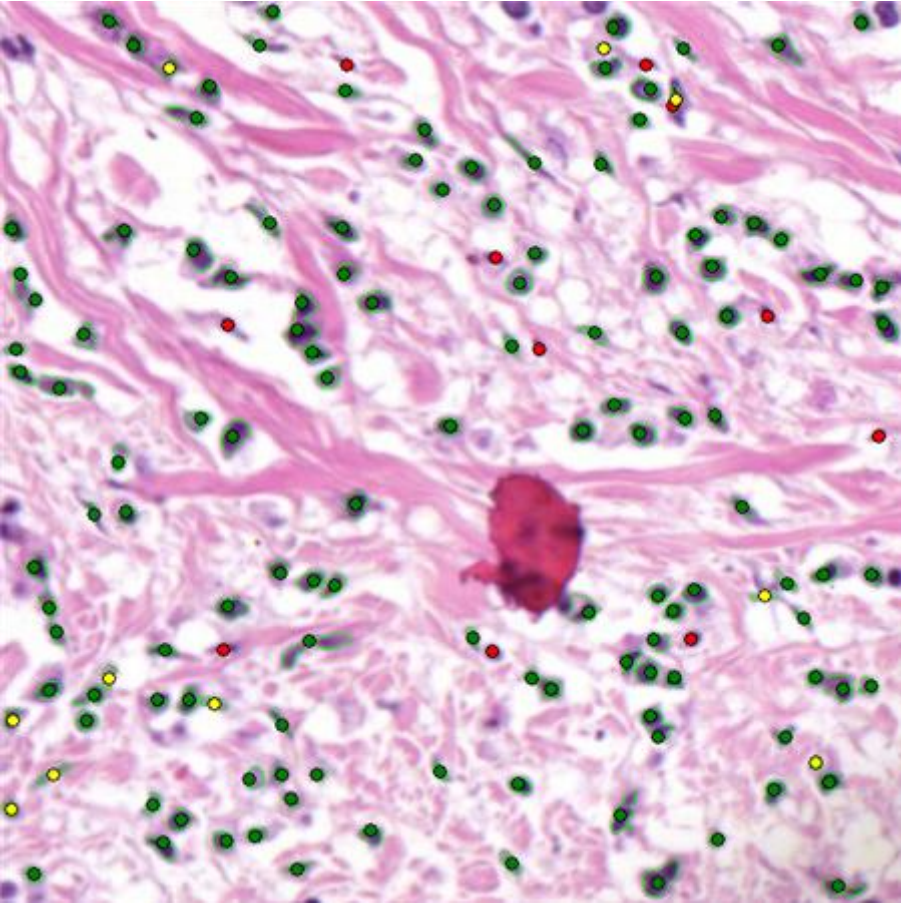

Wienert

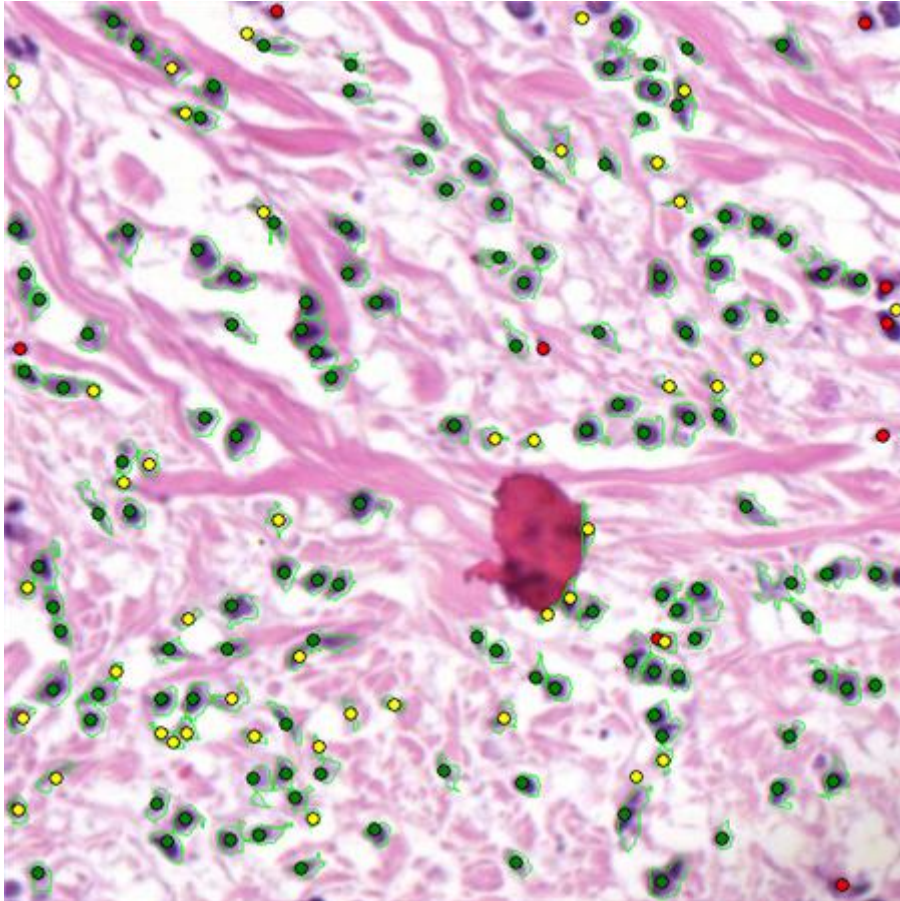

AI-Kofahi (optimized)

|                      | <b>Wienert</b> | <b>AI-Kofahi (automatic)</b> | <b>AI-Kofahi (optimized)</b> |
|----------------------|----------------|------------------------------|------------------------------|
| nuclei               | 136            | 136                          | 136                          |
| true positive count  | 125            | 127                          | 127                          |
| false negative count | 11             | 9                            | 9                            |
| false positive count | 10             | 77                           | 43                           |
| precision            | 0,926          | 0,623                        | 0,747                        |
| recall               | 0,919          | 0,934                        | 0,934                        |
| conglomerate         | 0,960          | 0,992                        | 0,992                        |
| time(ms)             | 546            | 655                          | 1669                         |

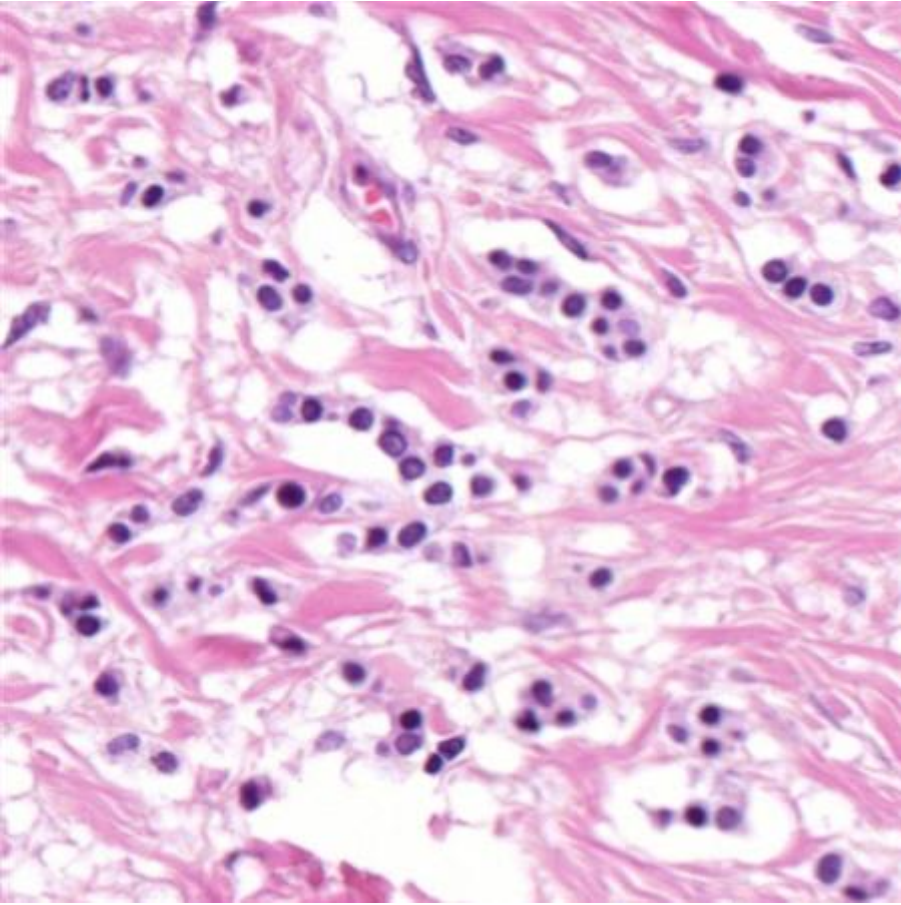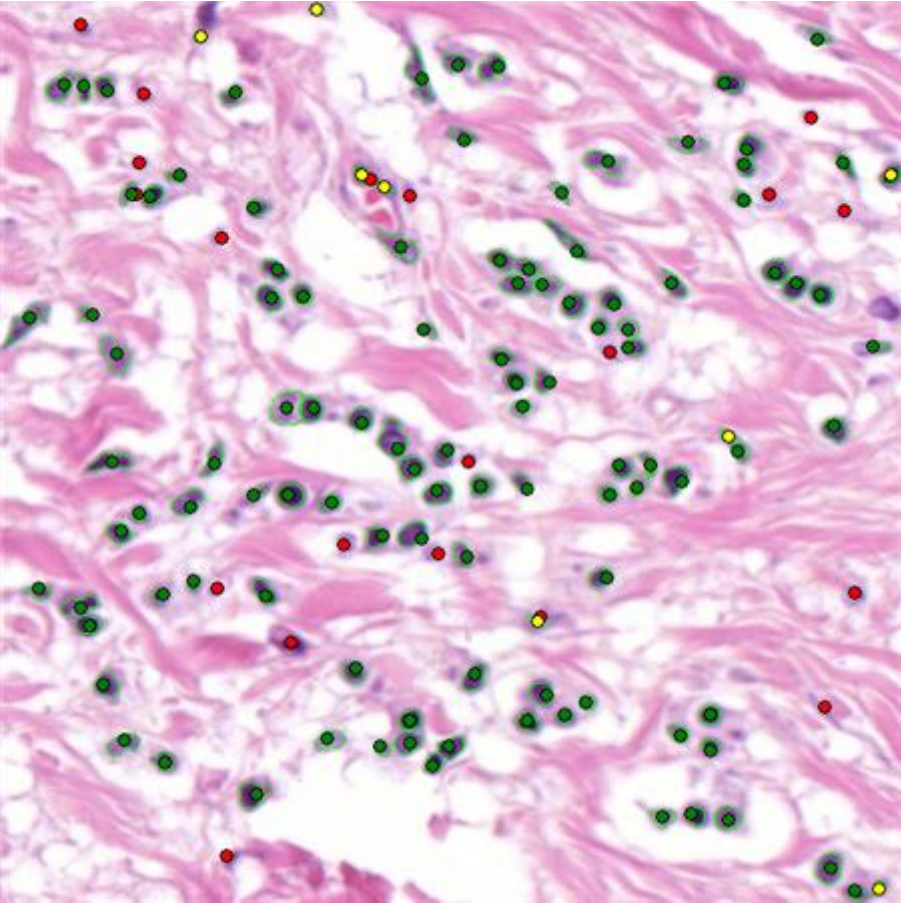

Wienert

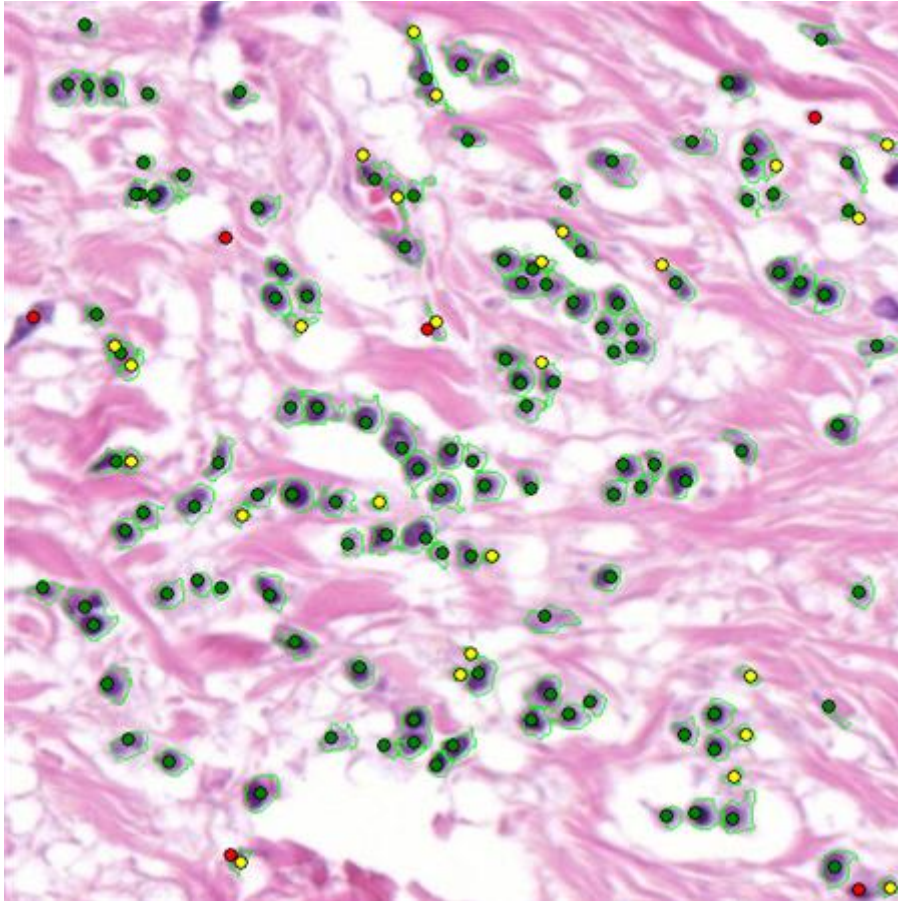

Al-Kofahi (optimized)

|                      | <b>Wienert</b> | <b>Al-Kofahi (automatic)</b> | <b>Al-Kofahi (optimized)</b> |
|----------------------|----------------|------------------------------|------------------------------|
| nuclei               | 126            | 126                          | 126                          |
| true positive count  | 106            | 120                          | 120                          |
| false negative count | 20             | 6                            | 6                            |
| false positive count | 8              | 63                           | 26                           |
| precision            | 0,930          | 0,656                        | 0,822                        |
| recall               | 0,841          | 0,952                        | 0,952                        |
| conglomerate         | 0,962          | 0,950                        | 0,967                        |
| time(ms)             | 561            | 608                          | 1528                         |



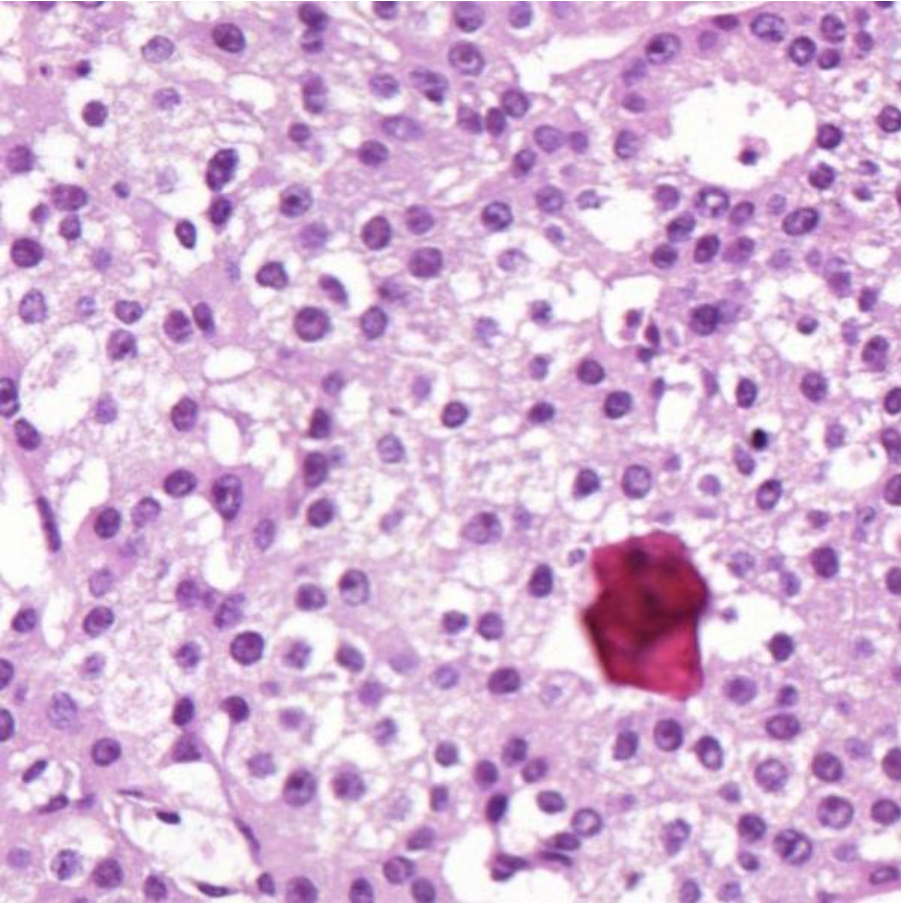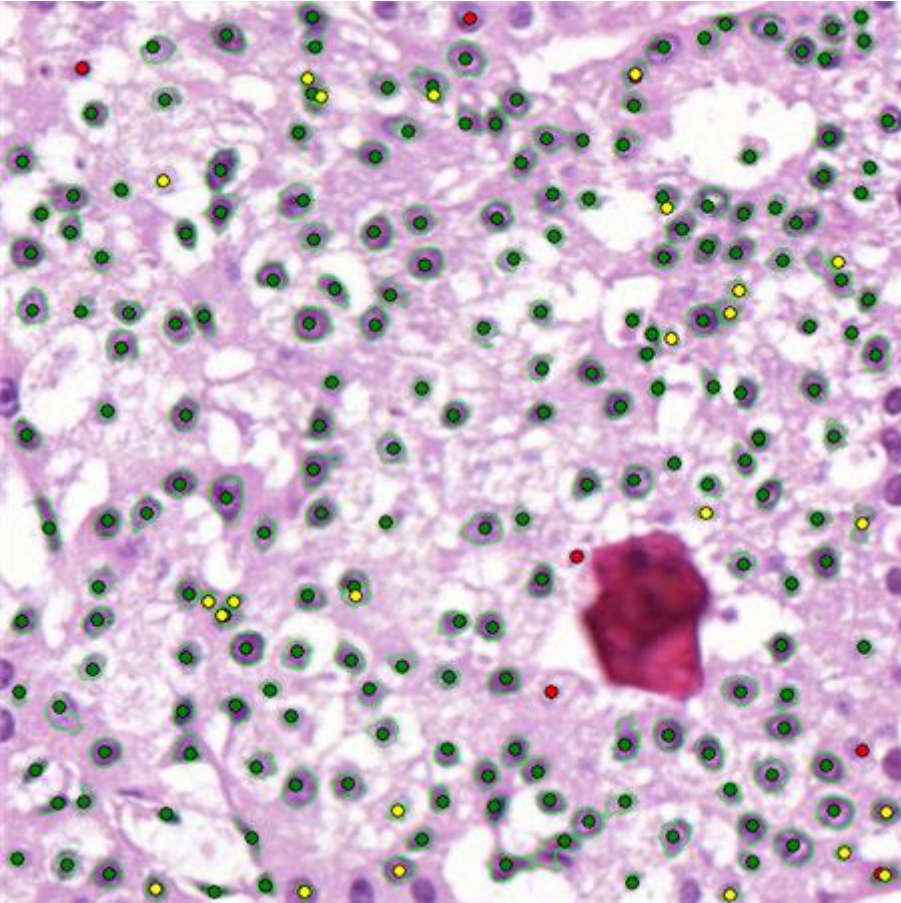

Wienert

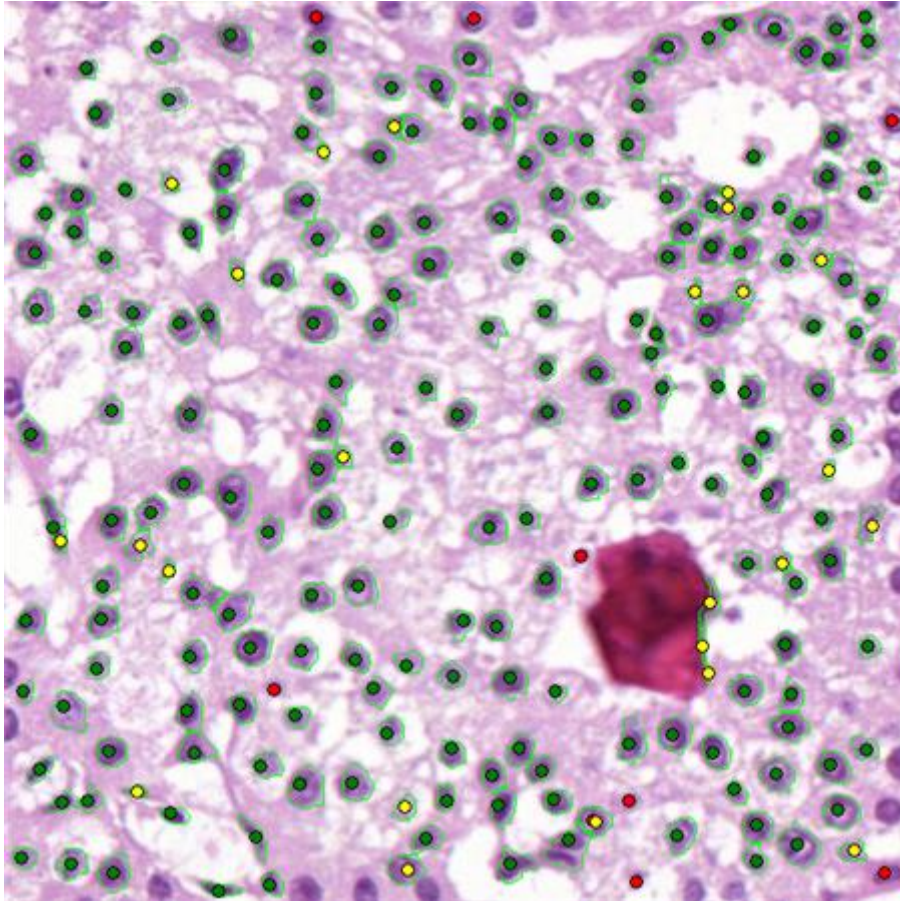

Al-Kofahi (optimized)

|                      | Wienert | Al-Kofahi (automatic) | Al-Kofahi (optimized) |
|----------------------|---------|-----------------------|-----------------------|
| nuclei               | 204     | 204                   | 204                   |
| true positive count  | 197     | 195                   | 195                   |
| false negative count | 7       | 9                     | 9                     |
| false positive count | 24      | 30                    | 24                    |
| precision            | 0,891   | 0,867                 | 0,890                 |
| recall               | 0,966   | 0,956                 | 0,956                 |
| conglomerate         | 0,980   | 1,000                 | 1,000                 |
| time(ms)             | 780     | 686                   | 1872                  |

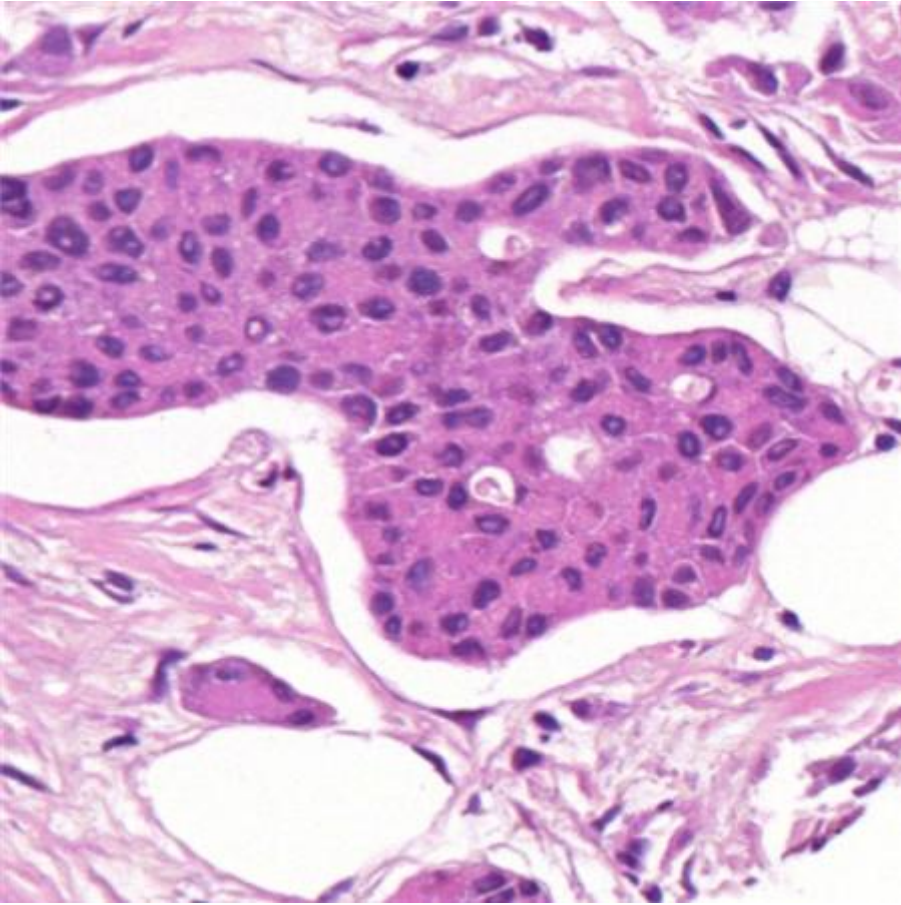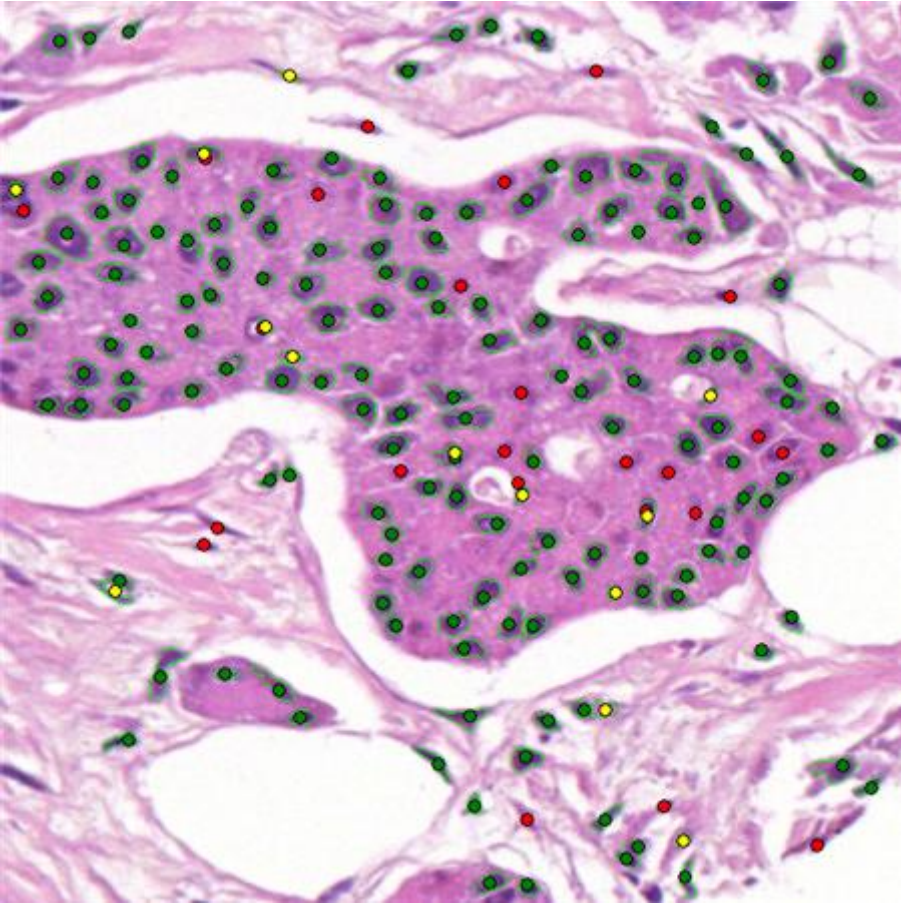

Wienert

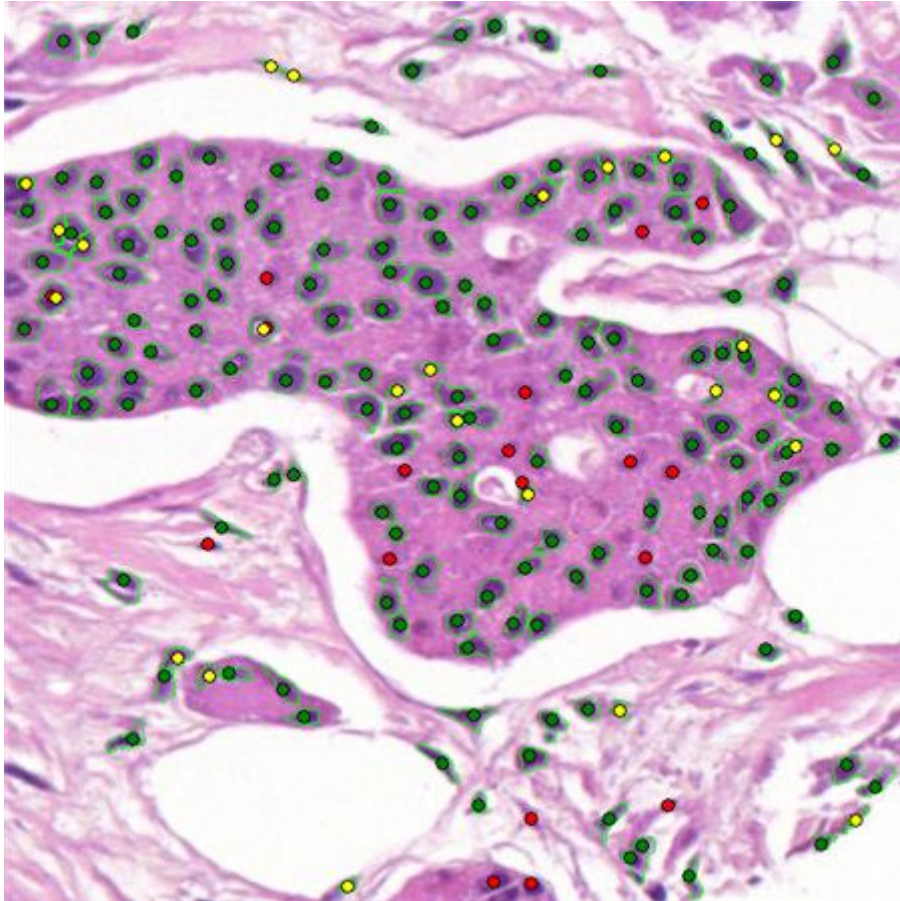

AI-Kofahi (optimized)

|                      | <b>Wienert</b> | <b>AI-Kofahi (automatic)</b> | <b>AI-Kofahi (optimized)</b> |
|----------------------|----------------|------------------------------|------------------------------|
| nuclei               | 180            | 180                          | 180                          |
| true positive count  | 156            | 161                          | 162                          |
| false negative count | 24             | 19                           | 18                           |
| false positive count | 13             | 33                           | 25                           |
| precision            | 0,923          | 0,830                        | 0,866                        |
| recall               | 0,867          | 0,894                        | 0,900                        |
| conglomerate         | 0,987          | 0,981                        | 0,981                        |
| time(ms)             | 624            | 717                          | 1731                         |

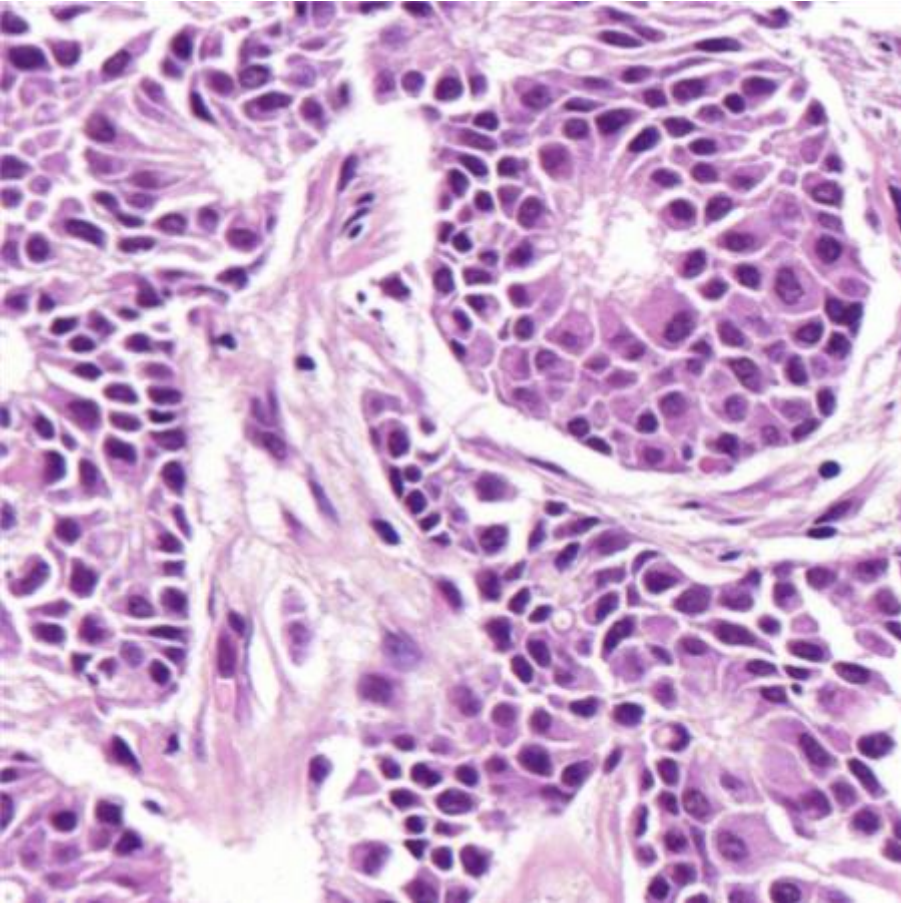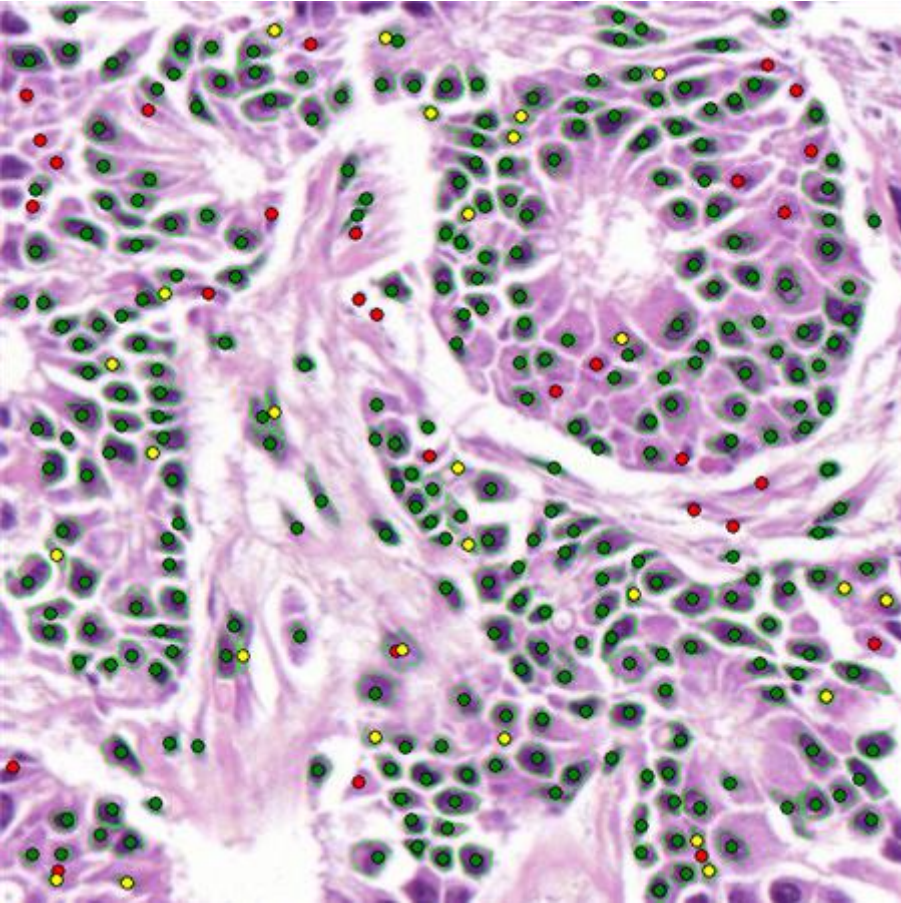

Wienert

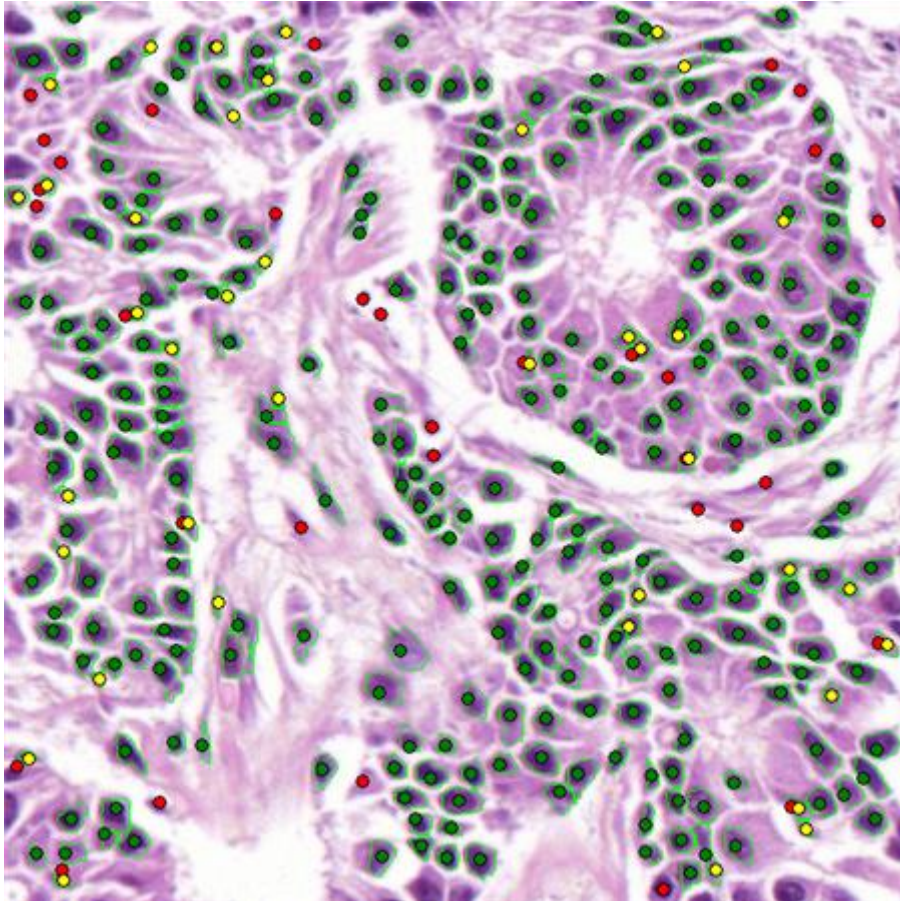

AI-Kofahi (optimized)

|                      | <b>Wienert</b> | <b>AI-Kofahi (automatic)</b> | <b>AI-Kofahi (optimized)</b> |
|----------------------|----------------|------------------------------|------------------------------|
| nuclei               | 311            | 311                          | 311                          |
| true positive count  | 282            | 277                          | 277                          |
| false negative count | 29             | 34                           | 34                           |
| false positive count | 27             | 91                           | 39                           |
| precision            | 0,913          | 0,753                        | 0,877                        |
| recall               | 0,907          | 0,891                        | 0,891                        |
| conglomerate         | 0,968          | 0,975                        | 0,978                        |
| time(ms)             | 811            | 733                          | 2230                         |

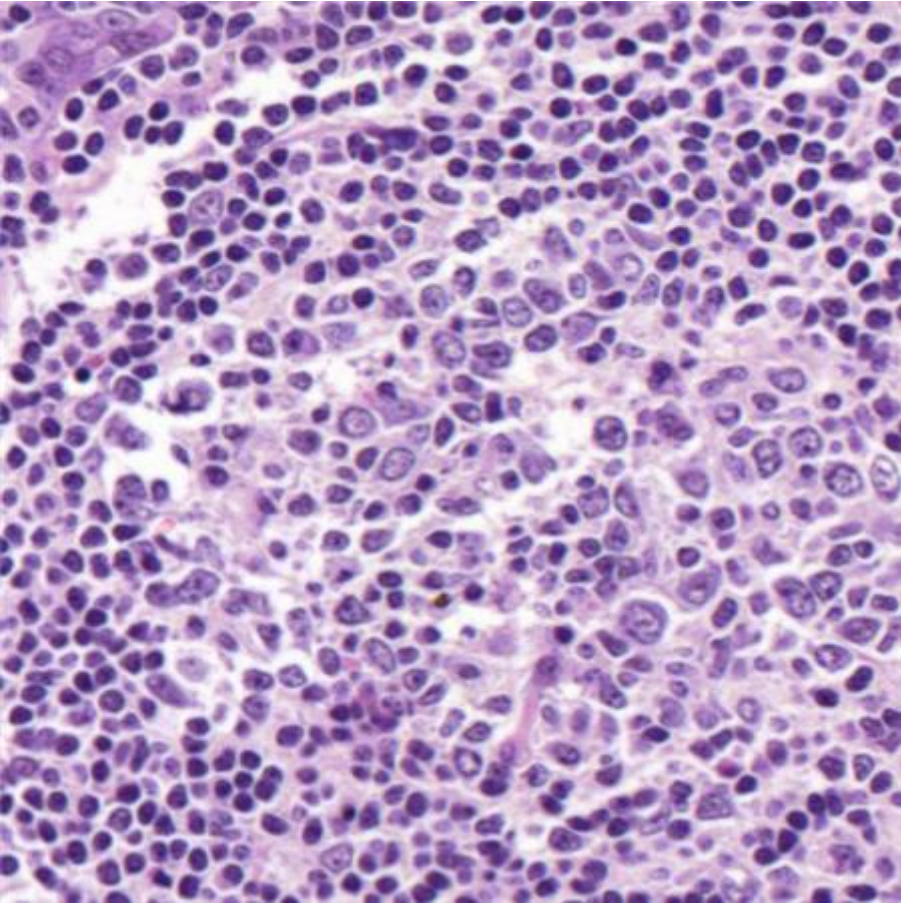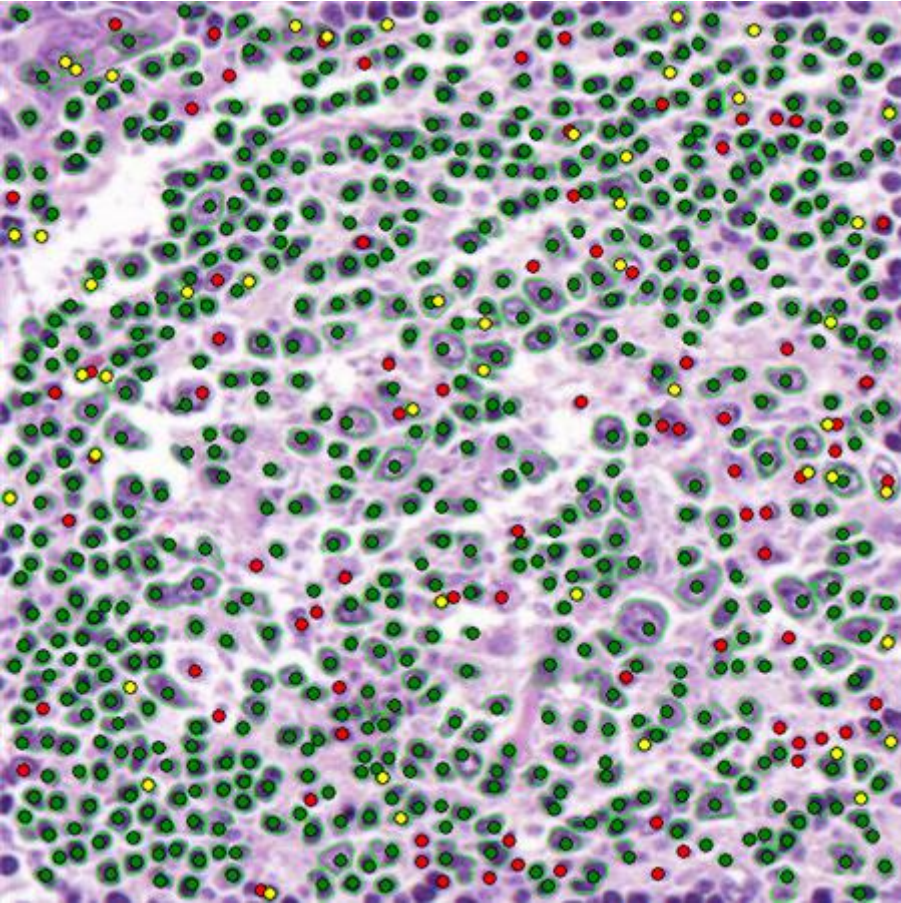

Wienert

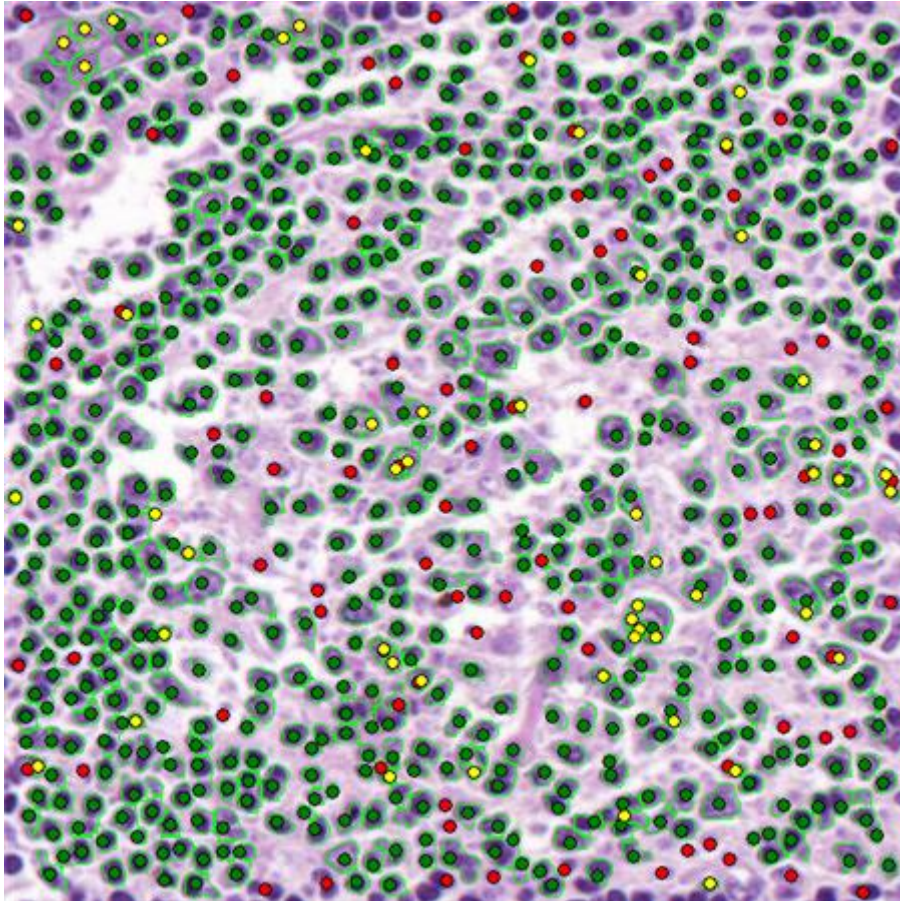

AI-Kofahi (optimized)

|                      | Wienert | AI-Kofahi (automatic) | AI-Kofahi (optimized) |
|----------------------|---------|-----------------------|-----------------------|
| nuclei               | 688     | 688                   | 688                   |
| true positive count  | 608     | 607                   | 603                   |
| false negative count | 80      | 81                    | 85                    |
| false positive count | 47      | 242                   | 54                    |
| precision            | 0,928   | 0,715                 | 0,918                 |
| recall               | 0,884   | 0,882                 | 0,876                 |
| conglomerate         | 0,903   | 0,913                 | 0,892                 |
| time(ms)             | 1419    | 702                   | 3042                  |



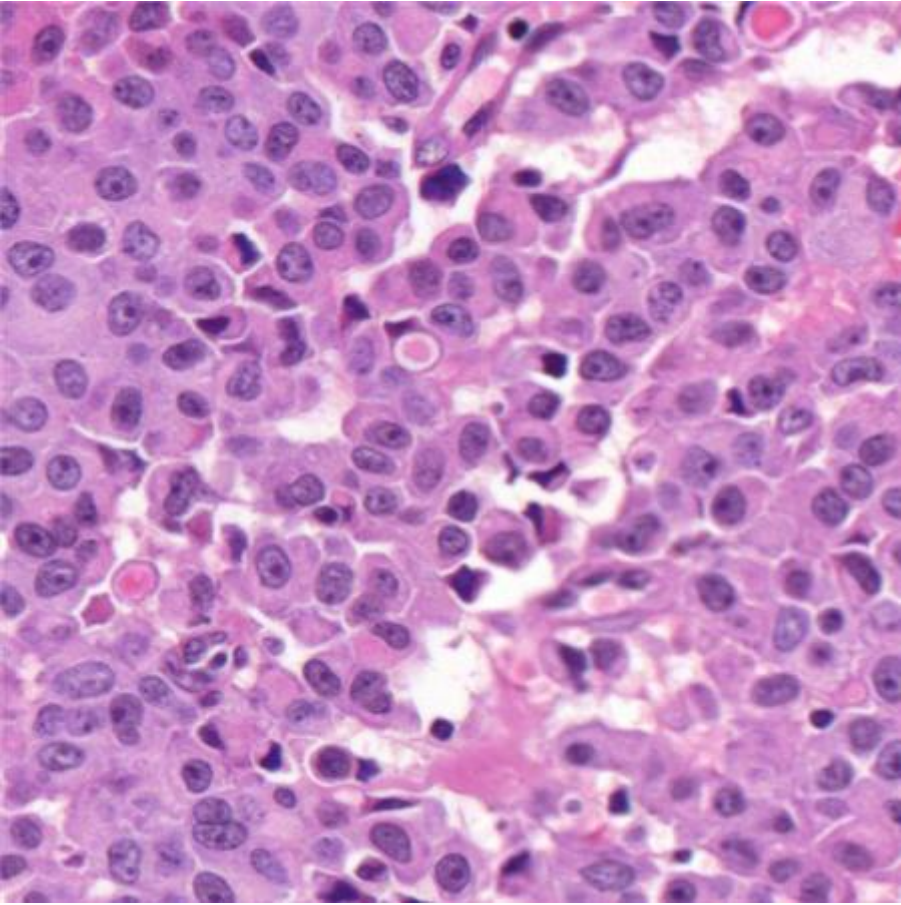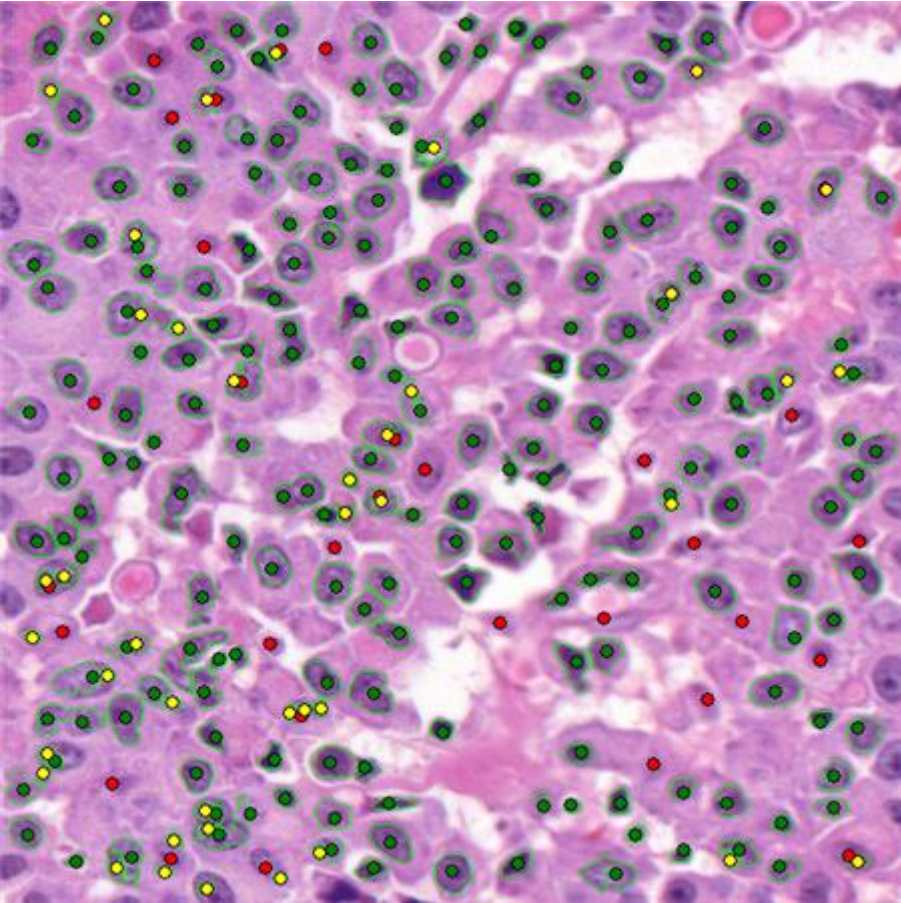

Wienert

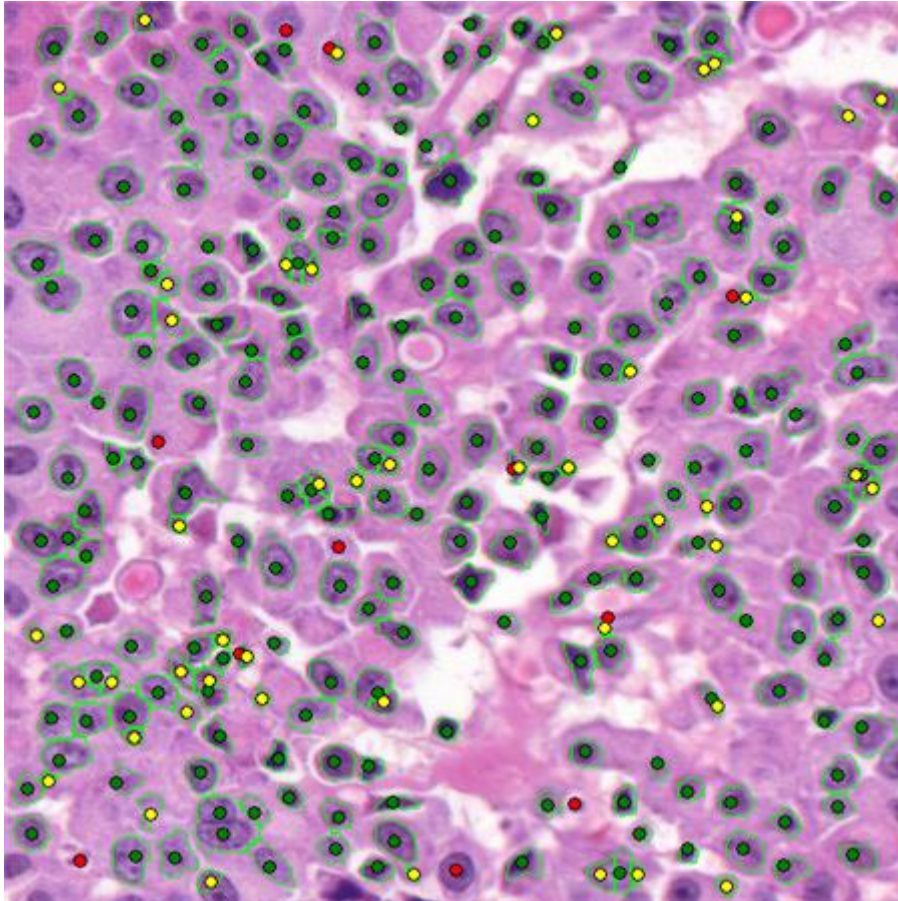

Al-Kofahi (optimized)

|                      | <b>Wienert</b> | <b>Al-Kofahi (automatic)</b> | <b>Al-Kofahi (optimized)</b> |
|----------------------|----------------|------------------------------|------------------------------|
| nuclei               | 233            | 233                          | 233                          |
| true positive count  | 202            | 222                          | 222                          |
| false negative count | 31             | 11                           | 11                           |
| false positive count | 41             | 58                           | 49                           |
| precision            | 0,831          | 0,793                        | 0,819                        |
| recall               | 0,867          | 0,953                        | 0,953                        |
| conglomerate         | 0,980          | 0,977                        | 0,982                        |
| time(ms)             | 904            | 670                          | 2137                         |

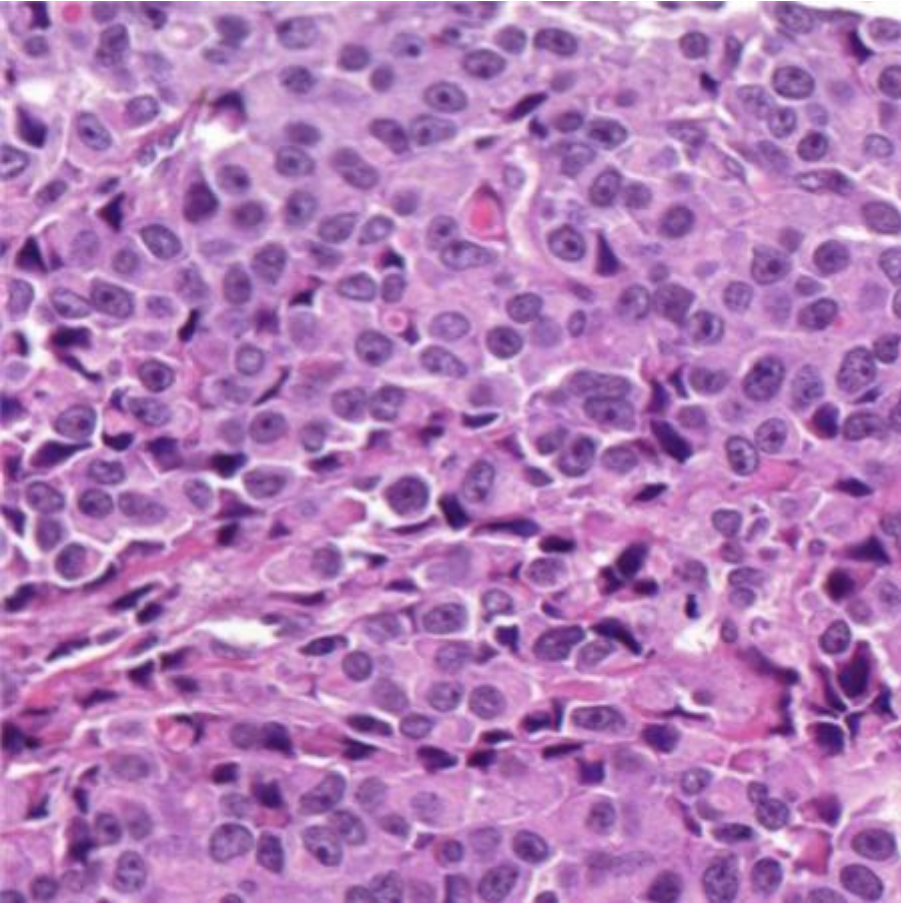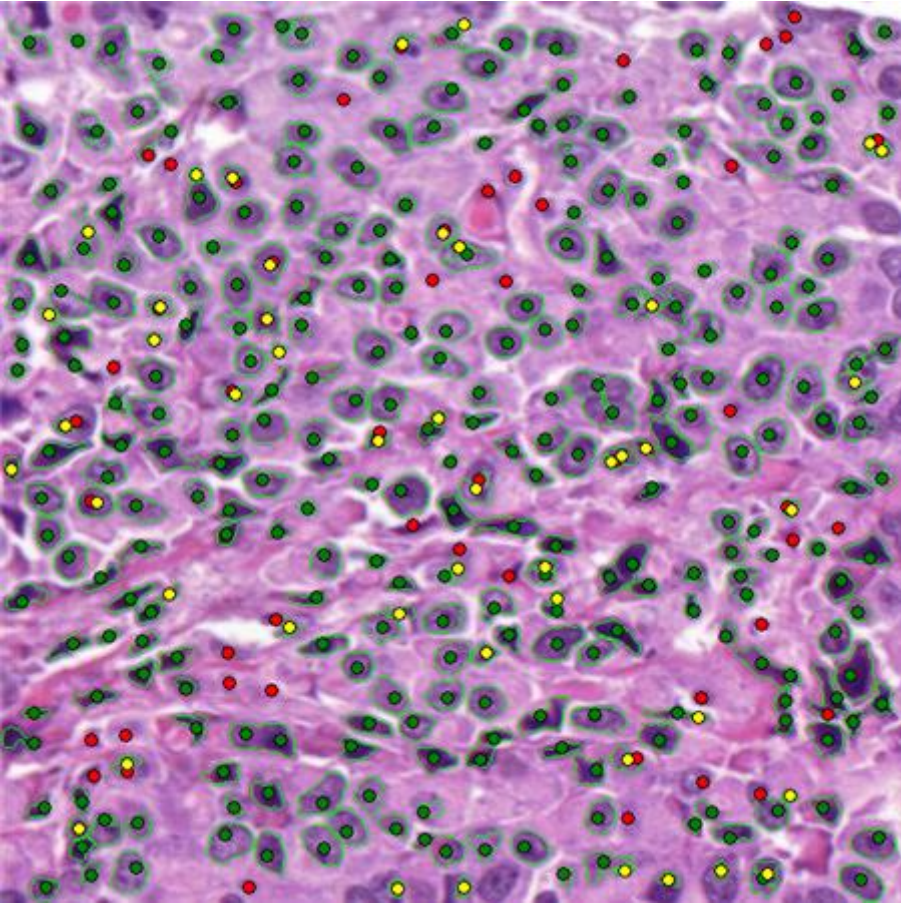

Wienert

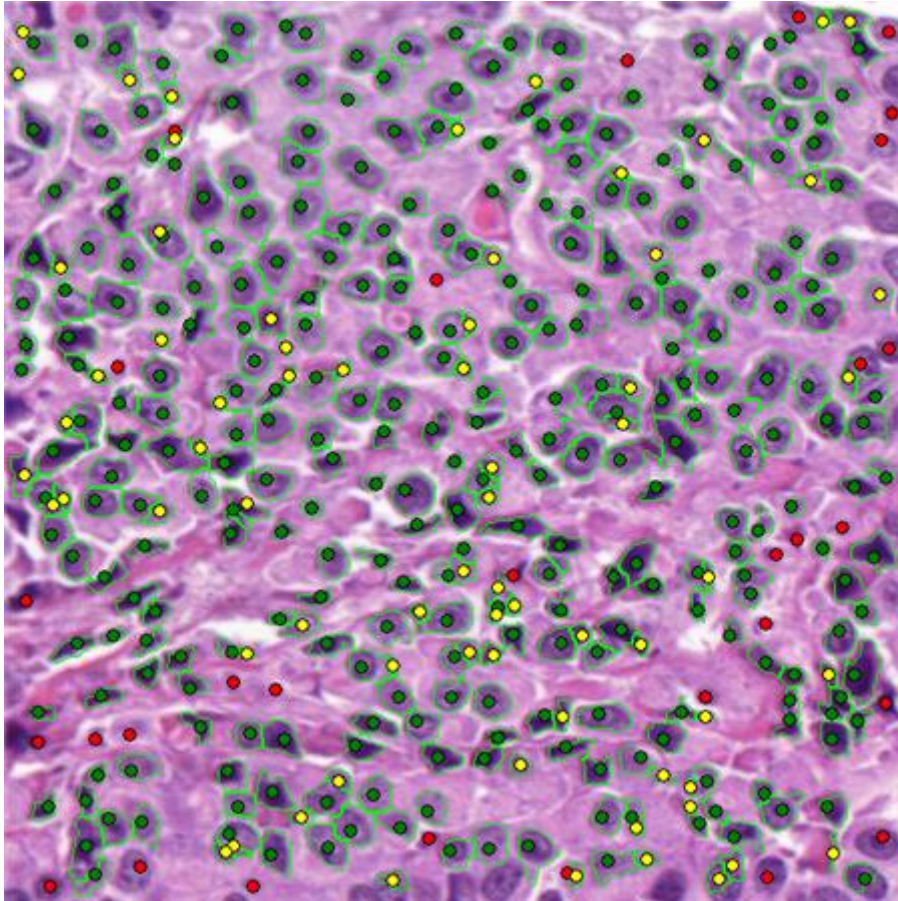

AI-Kofahi (optimized)

|                      | Wienert | AI-Kofahi (automatic) | AI-Kofahi (optimized) |
|----------------------|---------|-----------------------|-----------------------|
| nuclei               | 329     | 329                   | 329                   |
| true positive count  | 280     | 299                   | 299                   |
| false negative count | 49      | 30                    | 30                    |
| false positive count | 46      | 101                   | 69                    |
| precision            | 0,859   | 0,748                 | 0,813                 |
| recall               | 0,851   | 0,909                 | 0,909                 |
| conglomerate         | 0,971   | 0,967                 | 0,987                 |
| time(ms)             | 1076    | 702                   | 2449                  |

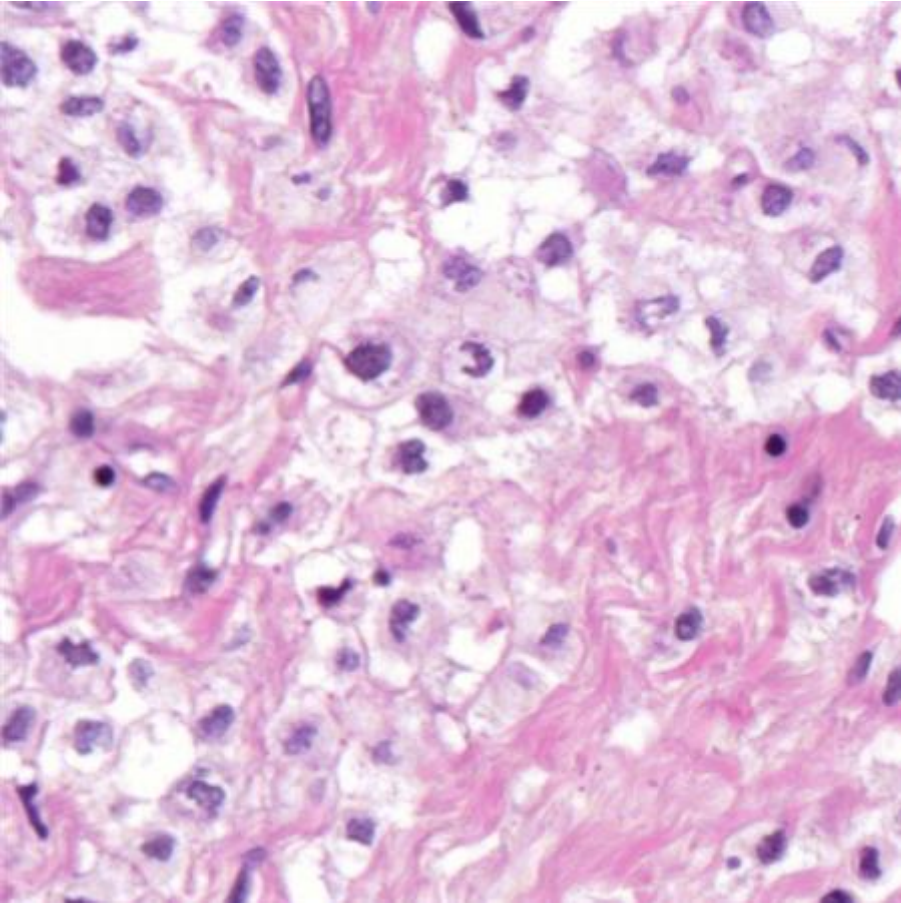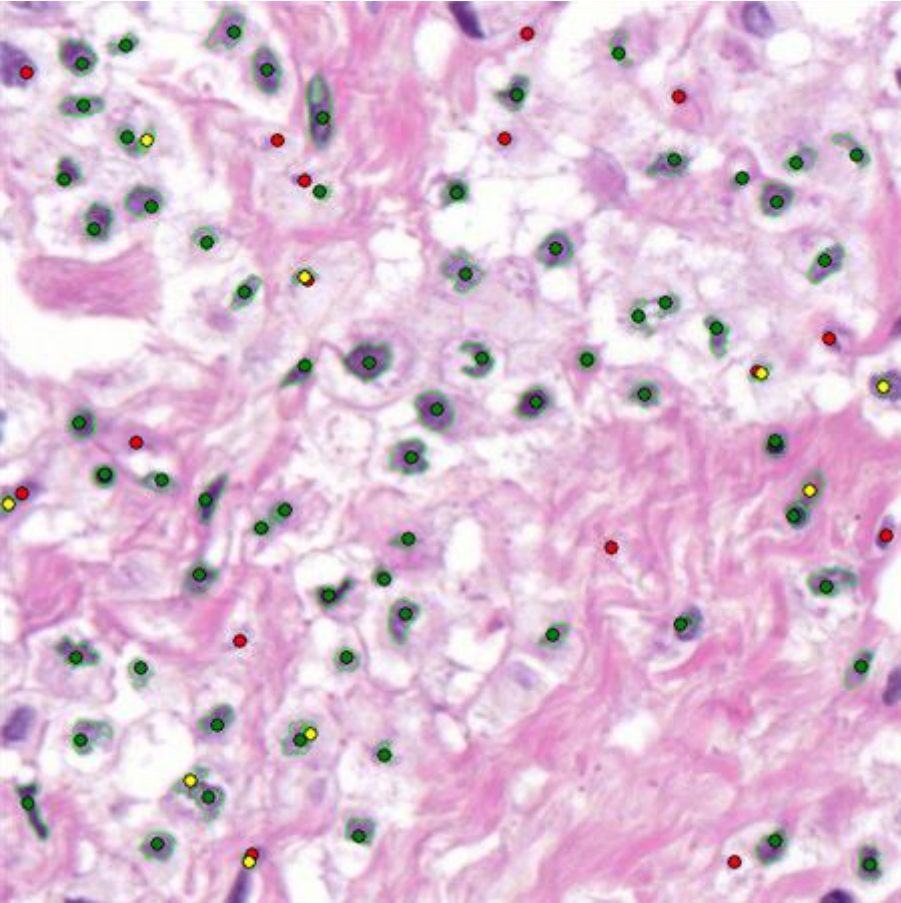

Wienert

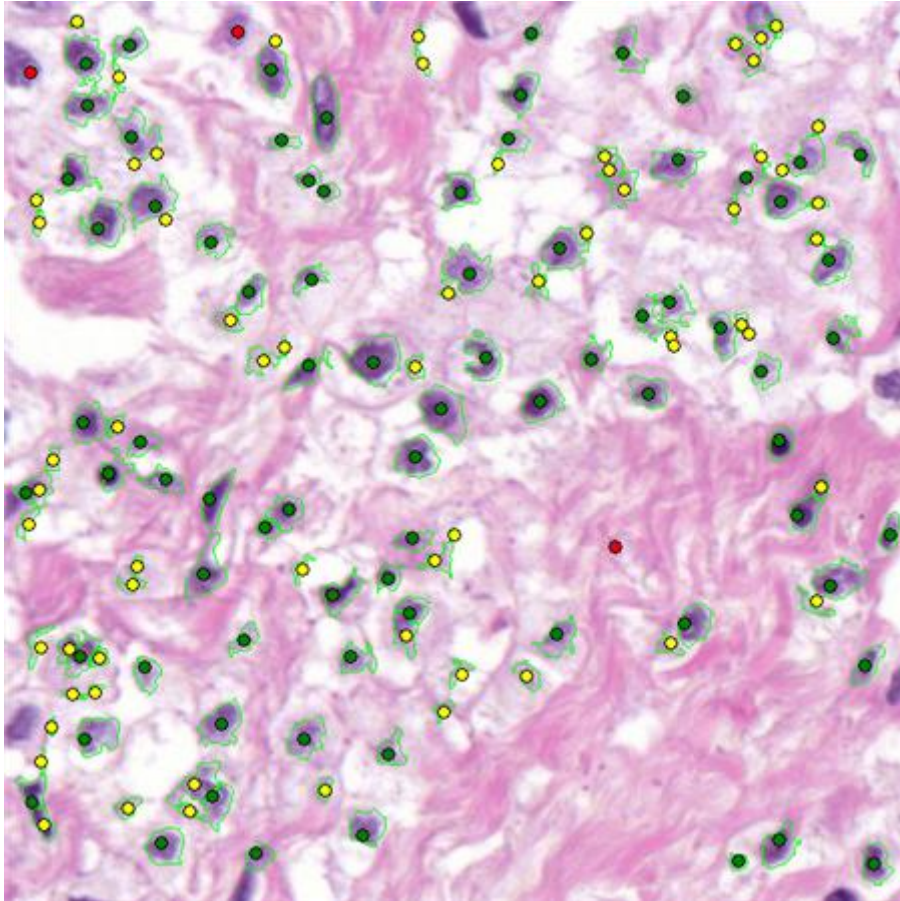

AI-Kofahi (optimized)

|                      | <b>Wienert</b> | <b>AI-Kofahi (automatic)</b> | <b>AI-Kofahi (optimized)</b> |
|----------------------|----------------|------------------------------|------------------------------|
| nuclei               | 81             | 81                           | 81                           |
| true positive count  | 65             | 78                           | 78                           |
| false negative count | 16             | 3                            | 3                            |
| false positive count | 9              | 98                           | 63                           |
| precision            | 0,878          | 0,443                        | 0,553                        |
| recall               | 0,802          | 0,963                        | 0,963                        |
| conglomerate         | 1,000          | 1,000                        | 1,000                        |
| time(ms)             | 530            | 670                          | 1653                         |

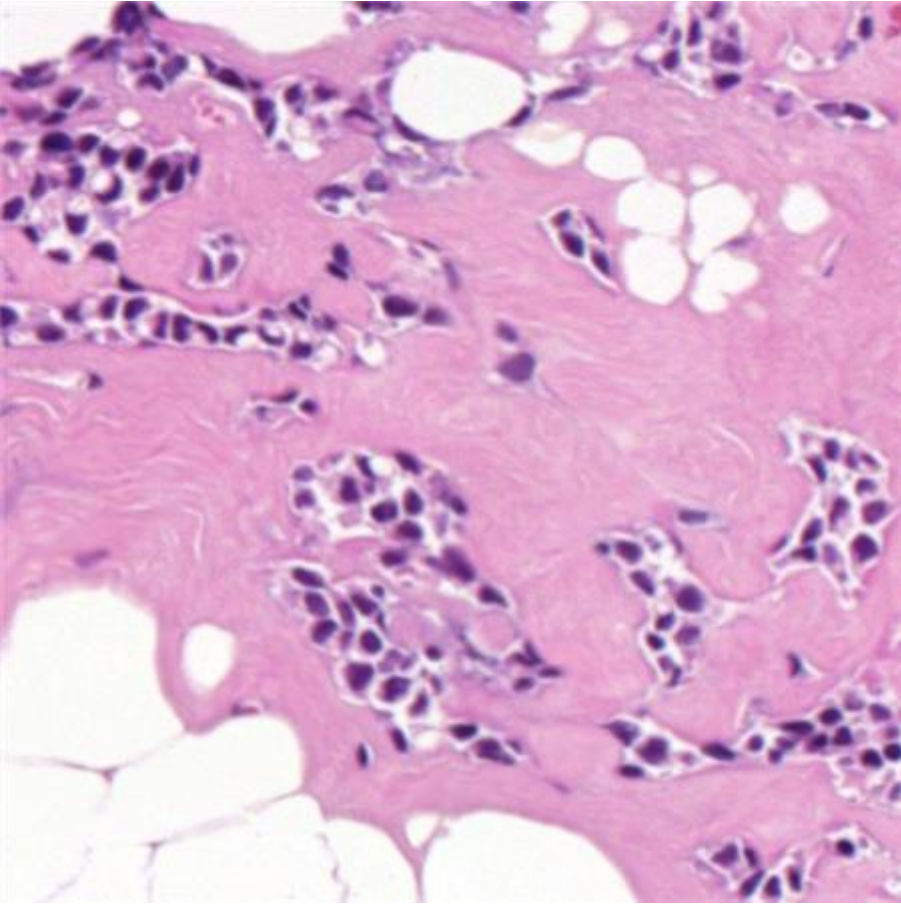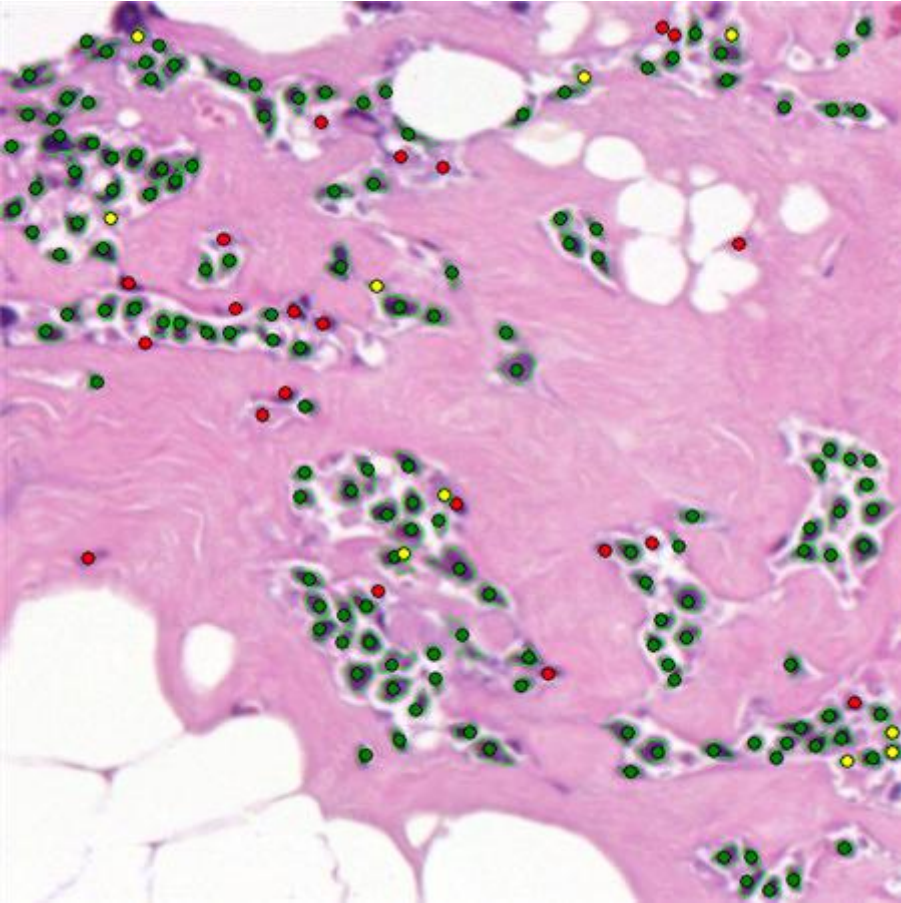

Wienert

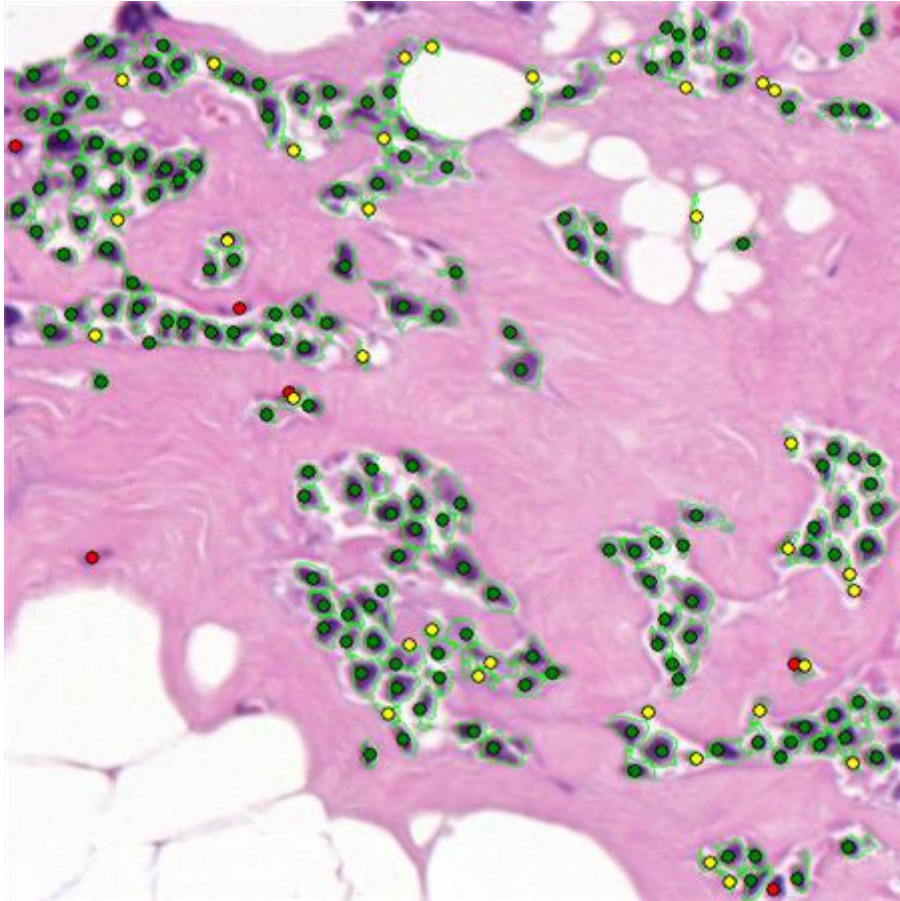

AI-Kofahi (optimized)

|                      | Wienert | AI-Kofahi (automatic) | AI-Kofahi (optimized) |
|----------------------|---------|-----------------------|-----------------------|
| nuclei               | 169     | 169                   | 169                   |
| true positive count  | 148     | 162                   | 162                   |
| false negative count | 21      | 7                     | 7                     |
| false positive count | 10      | 128                   | 34                    |
| precision            | 0,937   | 0,559                 | 0,827                 |
| recall               | 0,876   | 0,959                 | 0,959                 |
| conglomerate         | 0,939   | 0,944                 | 0,938                 |
| time(ms)             | 655     | 670                   | 1684                  |



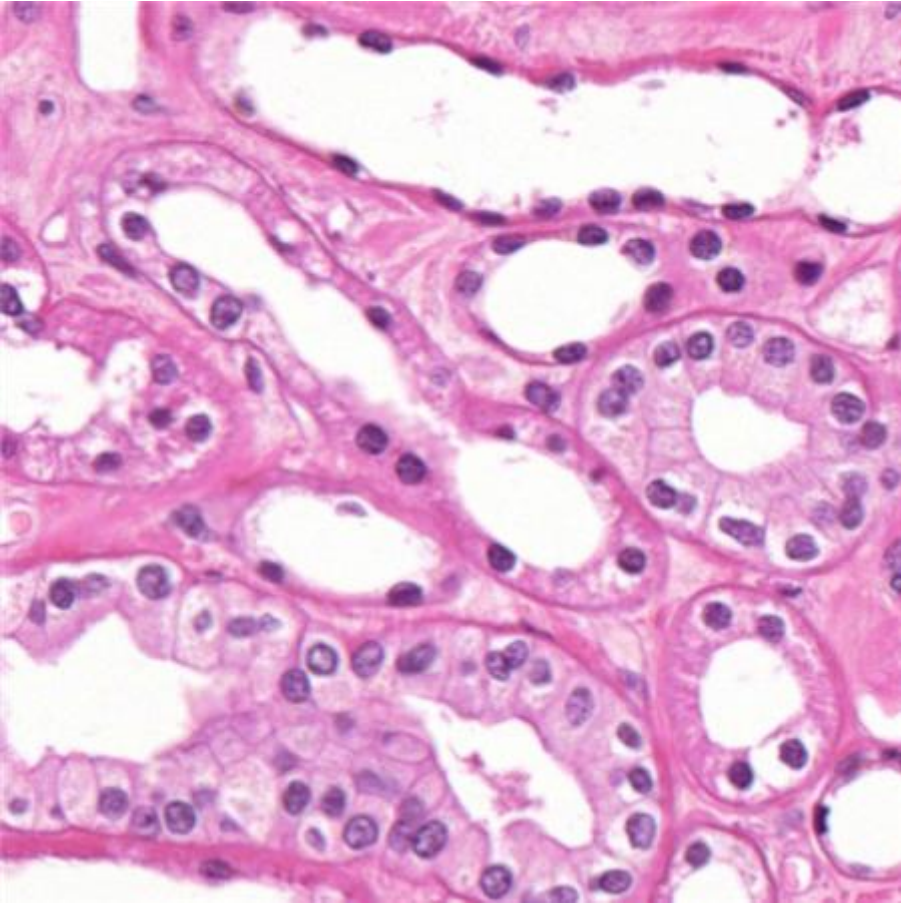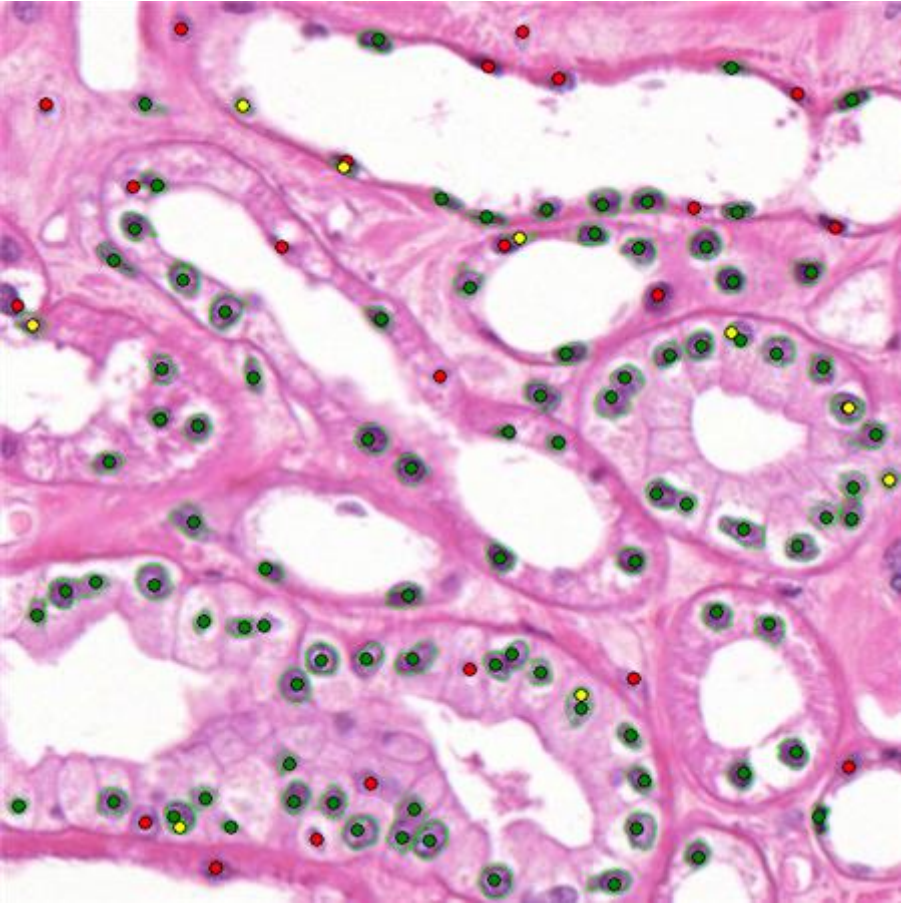

Wienert

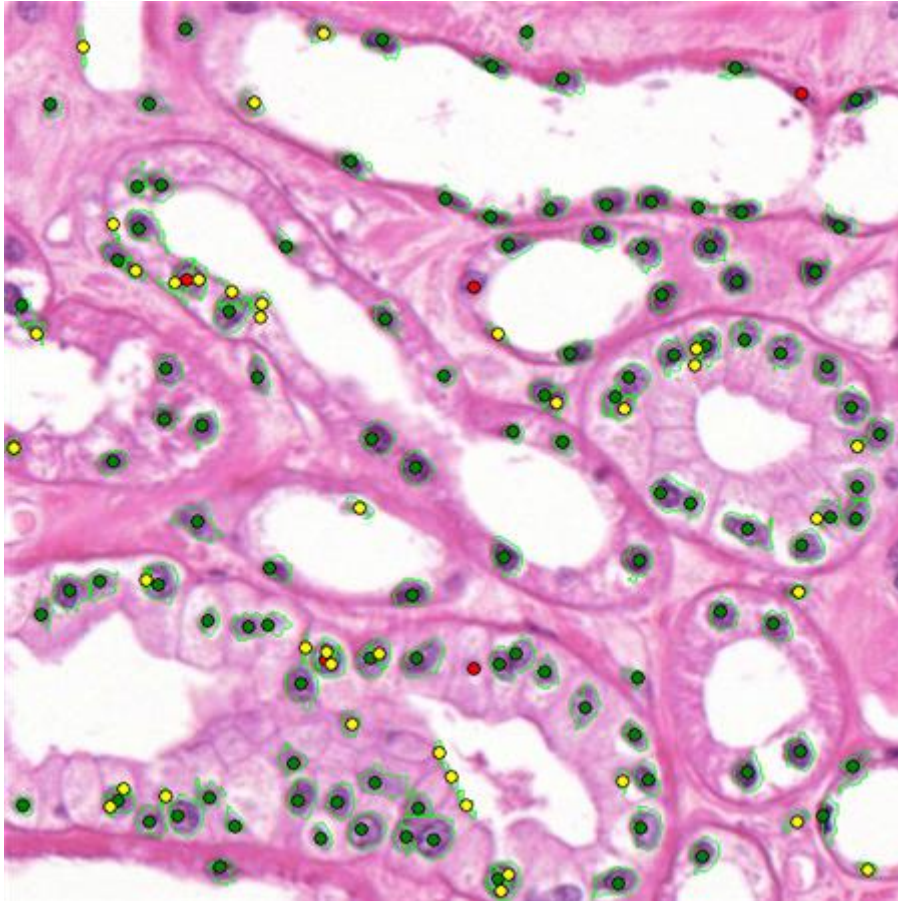

AI-Kofahi (optimized)

|                      | <b>Wienert</b> | <b>AI-Kofahi (automatic)</b> | <b>AI-Kofahi (optimized)</b> |
|----------------------|----------------|------------------------------|------------------------------|
| nuclei               | 114            | 114                          | 114                          |
| true positive count  | 91             | 109                          | 109                          |
| false negative count | 23             | 5                            | 5                            |
| false positive count | 9              | 62                           | 38                           |
| precision            | 0,910          | 0,637                        | 0,741                        |
| recall               | 0,798          | 0,956                        | 0,956                        |
| conglomerate         | 0,934          | 0,972                        | 0,991                        |
| time(ms)             | 577            | 624                          | 1544                         |

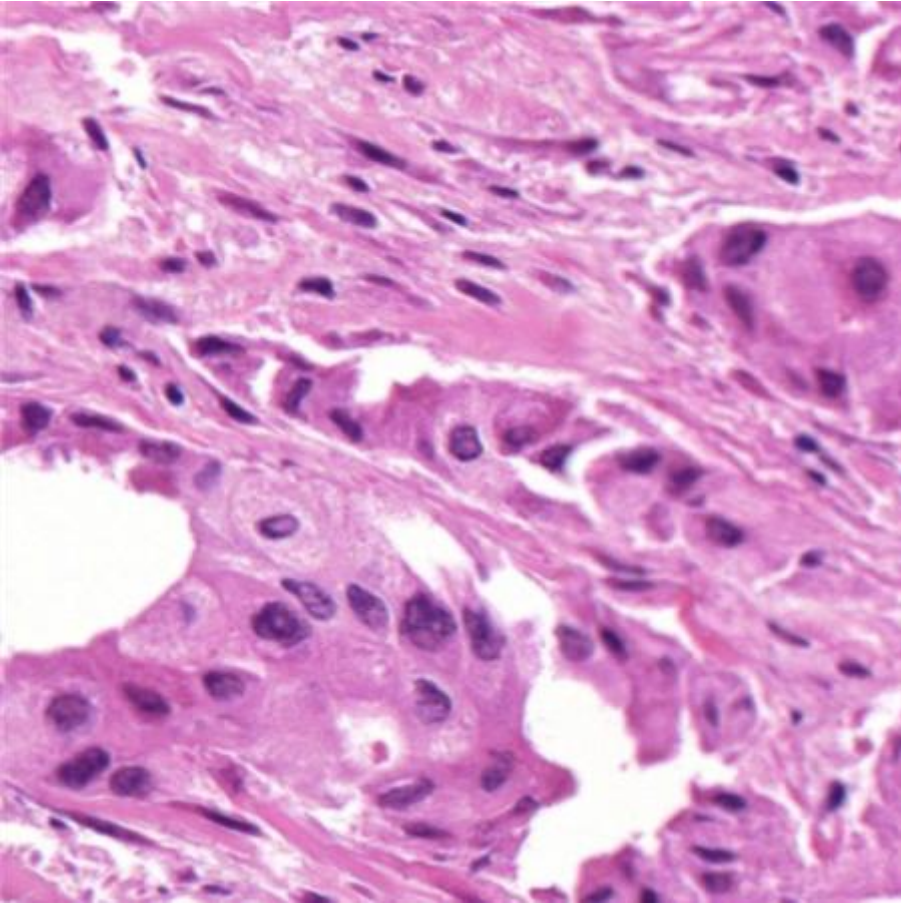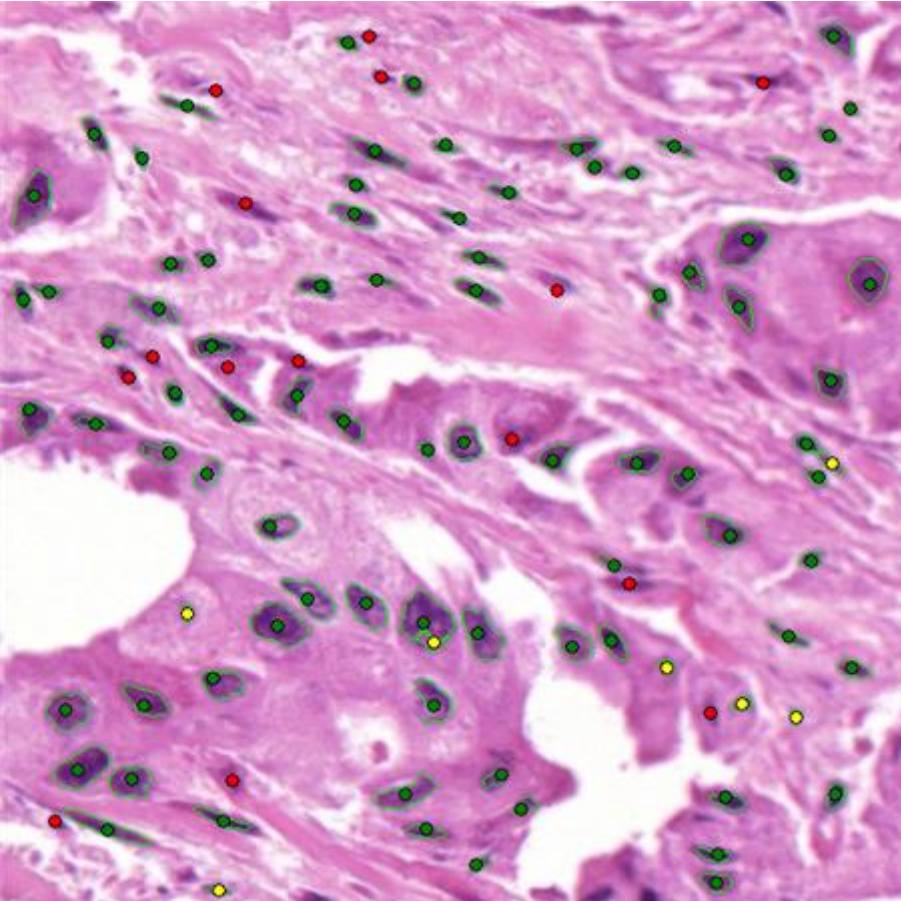

Wienert

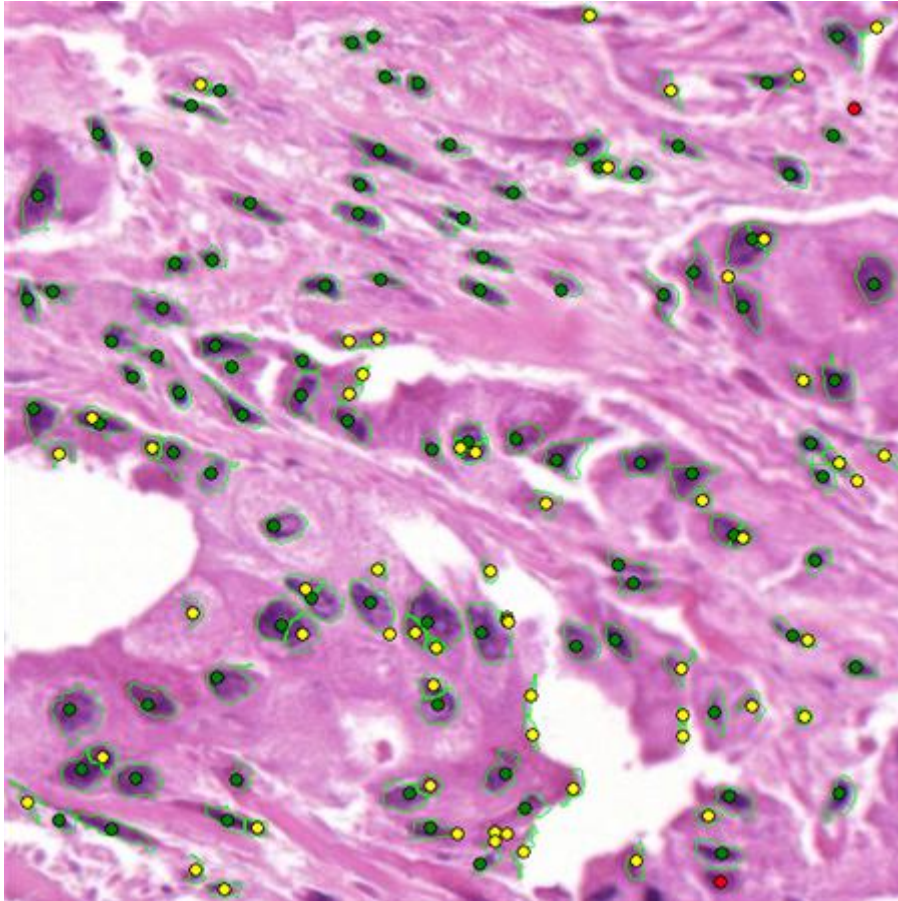

Al-Kofahi (optimized)

|                      | Wienert | Al-Kofahi (automatic) | Al-Kofahi (optimized) |
|----------------------|---------|-----------------------|-----------------------|
| nuclei               | 97      | 97                    | 688                   |
| true positive count  | 82      | 95                    | 603                   |
| false negative count | 15      | 2                     | 85                    |
| false positive count | 7       | 76                    | 54                    |
| precision            | 0,921   | 0,556                 | 0,918                 |
| recall               | 0,845   | 0,979                 | 0,876                 |
| conglomerate         | 1,000   | 0,989                 | 0,989                 |
| time(ms)             | 530     | 639                   | 1606                  |

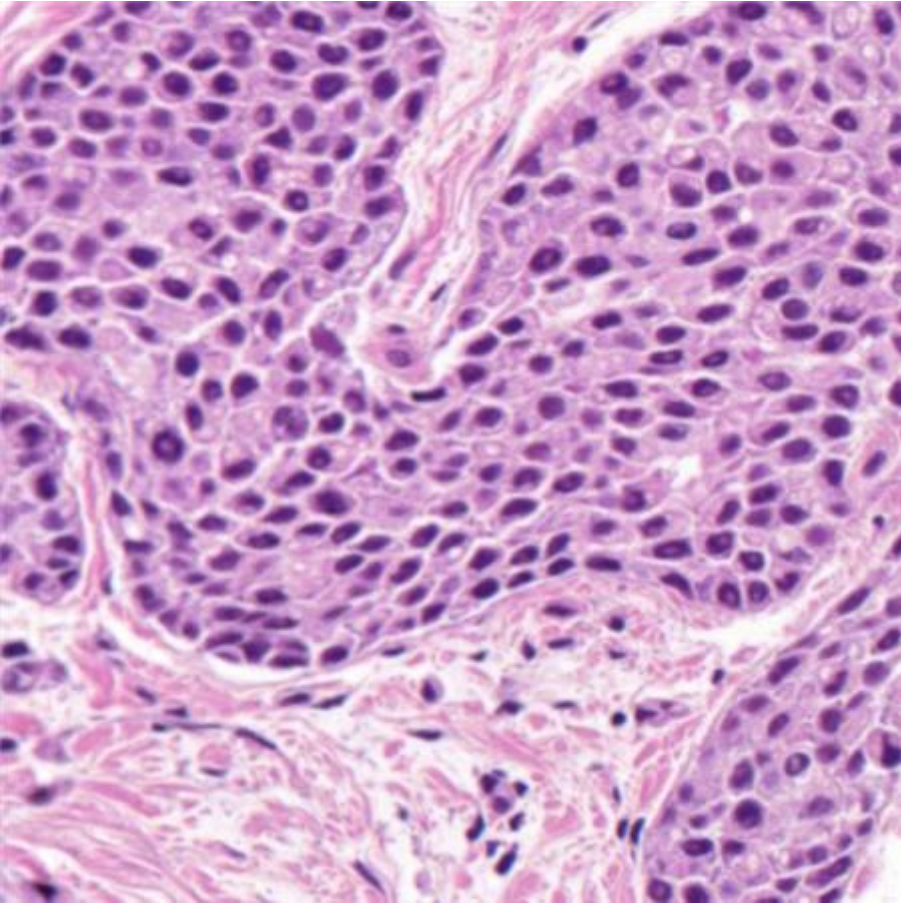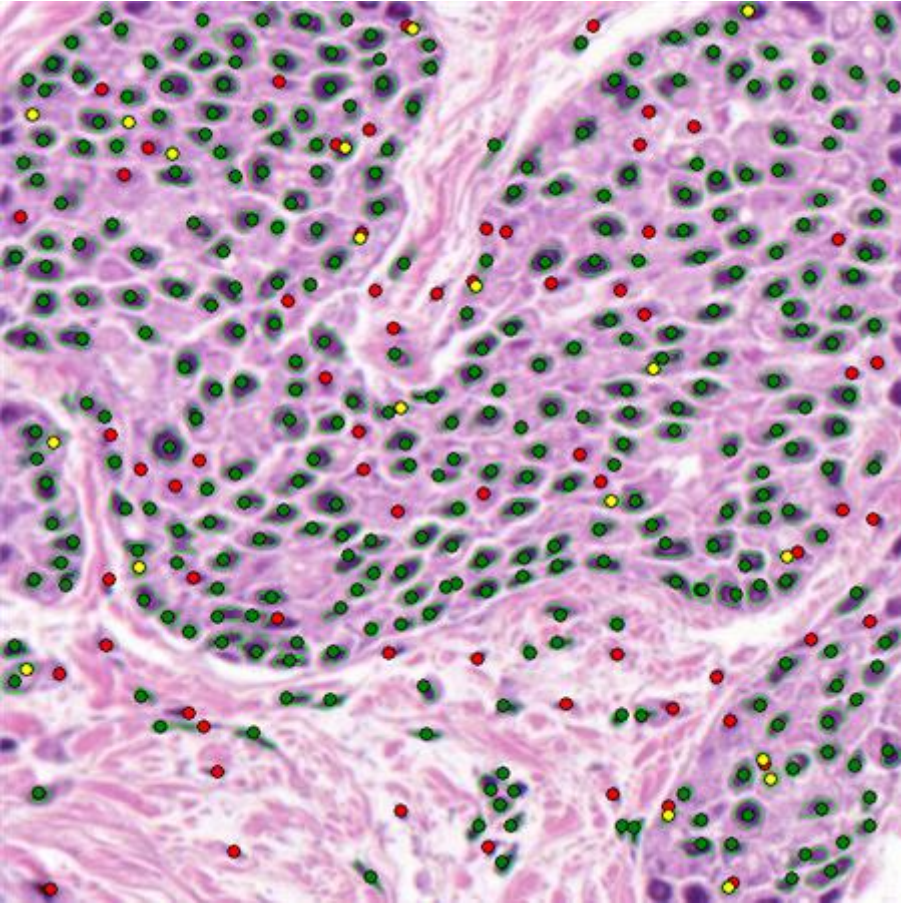

Wienert

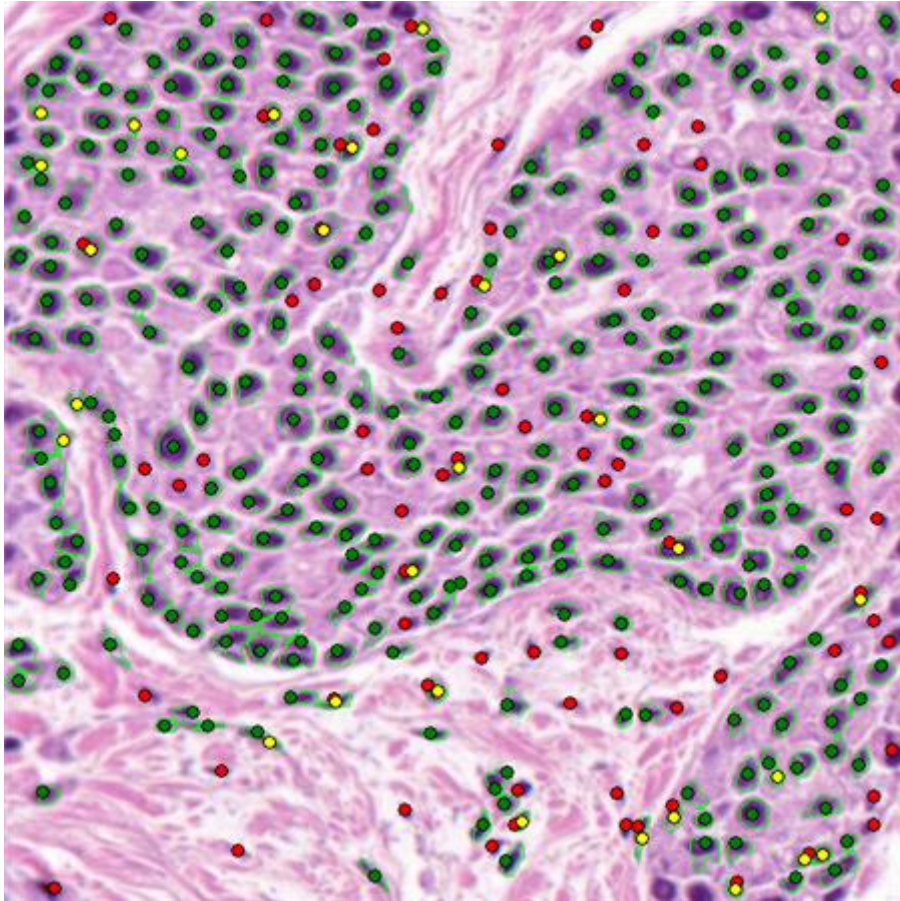

Al-Kofahi (optimized)

|                      | Wienert | Al-Kofahi (automatic) | Al-Kofahi (optimized) |
|----------------------|---------|-----------------------|-----------------------|
| nuclei               | 392     | 392                   | 392                   |
| true positive count  | 326     | 316                   | 316                   |
| false negative count | 66      | 76                    | 76                    |
| false positive count | 19      | 58                    | 54                    |
| precision            | 0,945   | 0,845                 | 0,854                 |
| recall               | 0,832   | 0,806                 | 0,806                 |
| conglomerate         | 0,969   | 0,959                 | 0,959                 |
| time(ms)             | 717     | 717                   | 2215                  |

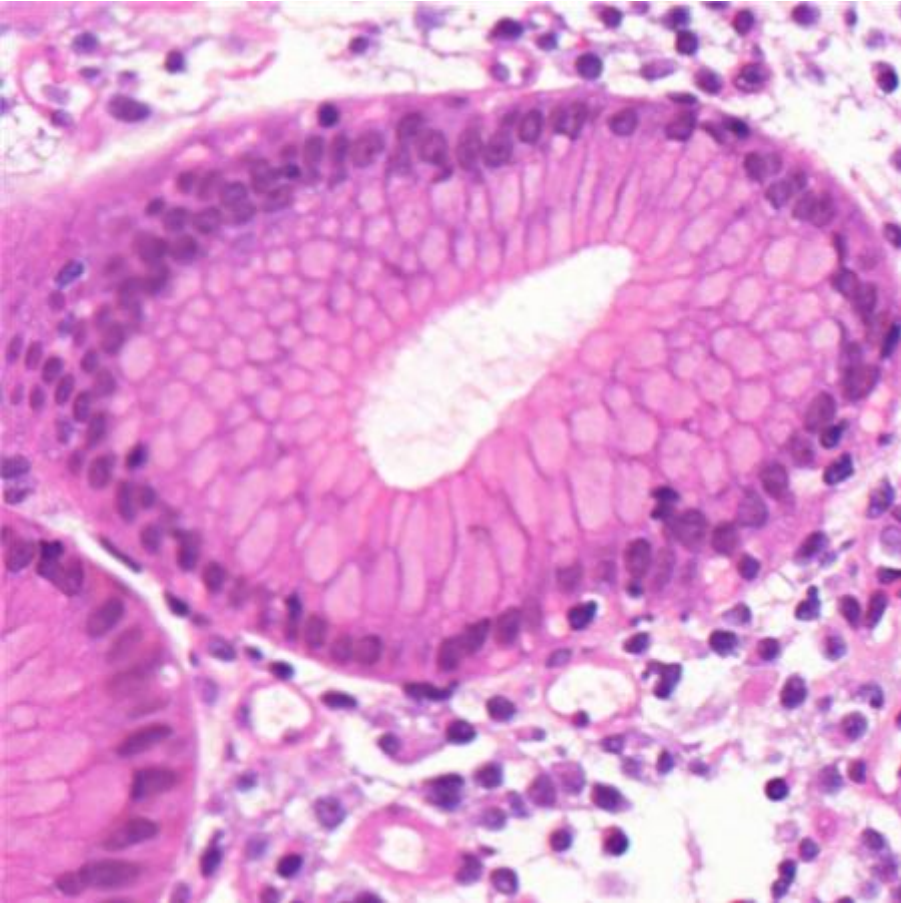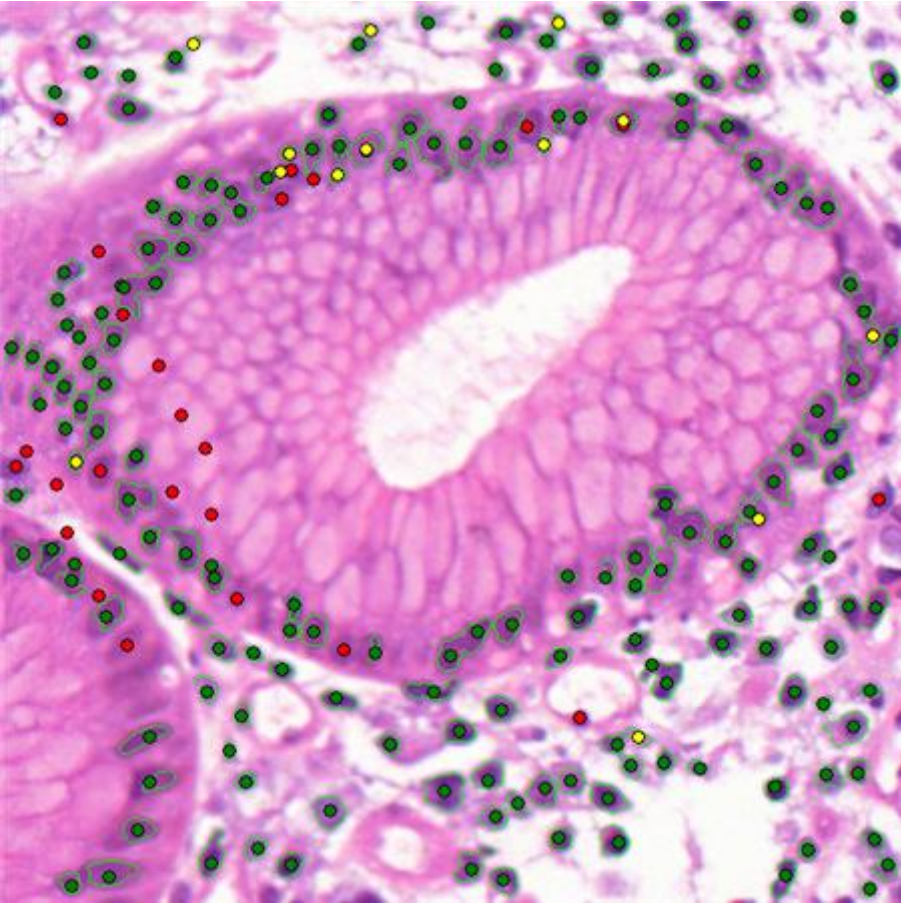

Wienert

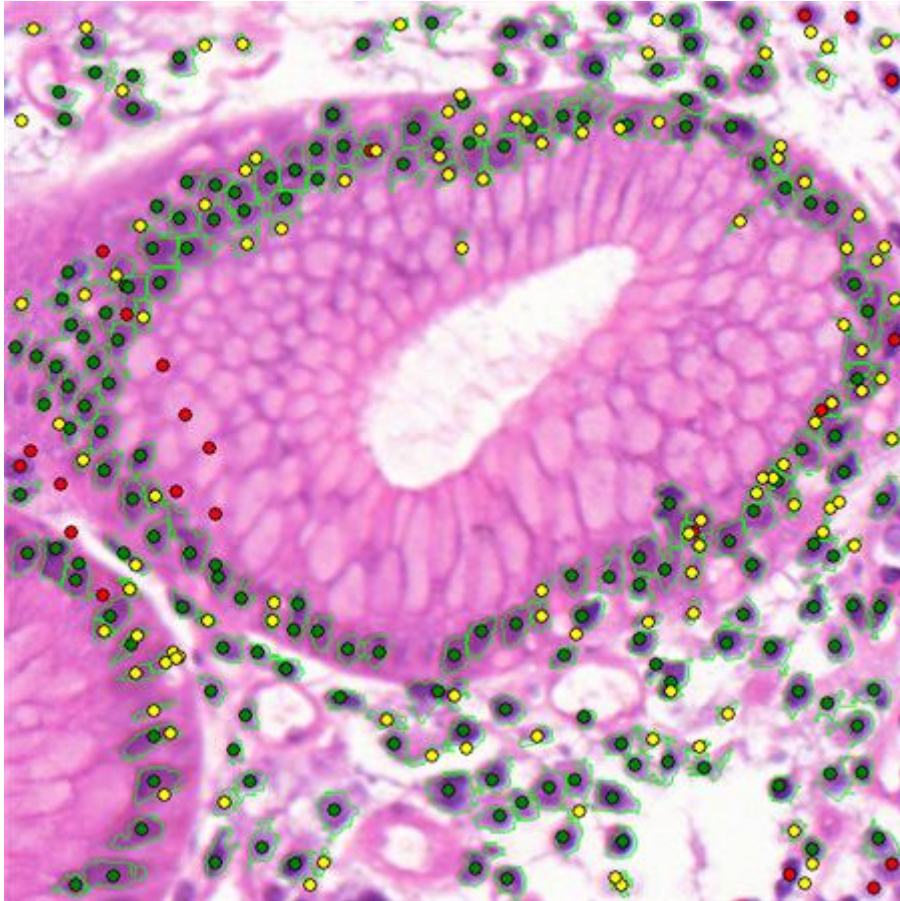

Al-Kofahi (optimized)

|                      | Wienert | Al-Kofahi (automatic) | Al-Kofahi (optimized) |
|----------------------|---------|-----------------------|-----------------------|
| nuclei               | 196     | 196                   | 196                   |
| true positive count  | 171     | 173                   | 174                   |
| false negative count | 25      | 23                    | 22                    |
| false positive count | 13      | 249                   | 102                   |
| precision            | 0,929   | 0,410                 | 0,630                 |
| recall               | 0,872   | 0,883                 | 0,888                 |
| conglomerate         | 0,928   | 0,959                 | 0,954                 |
| time(ms)             | 686     | 670                   | 2184                  |



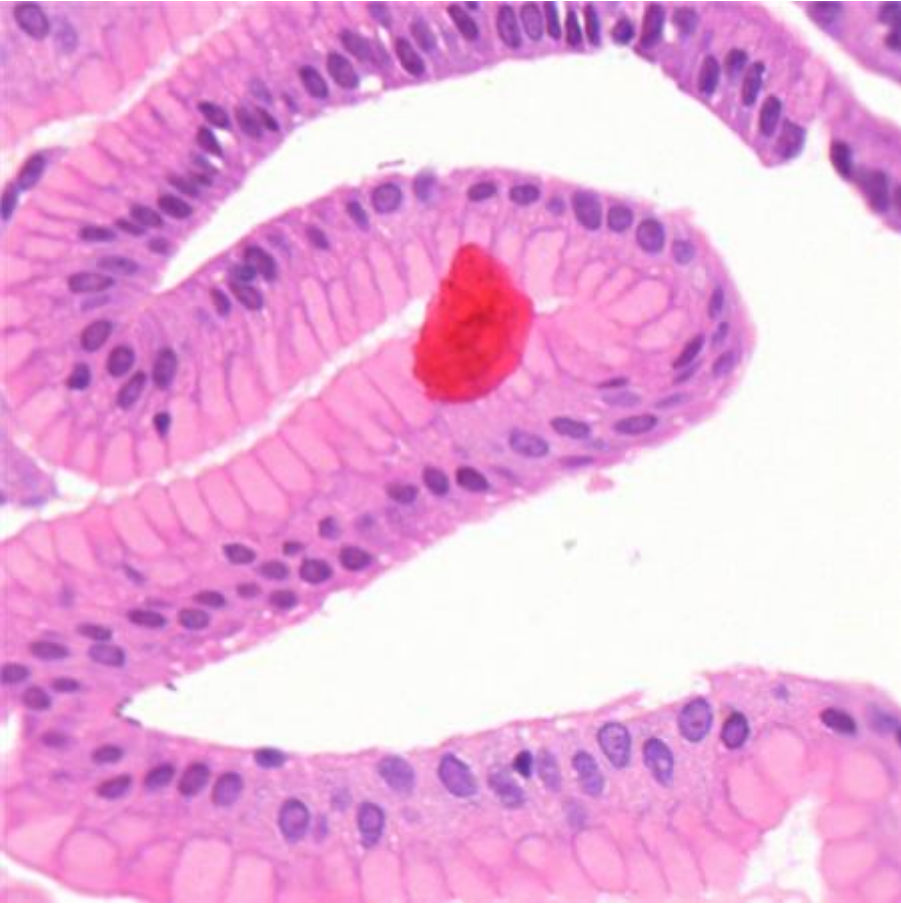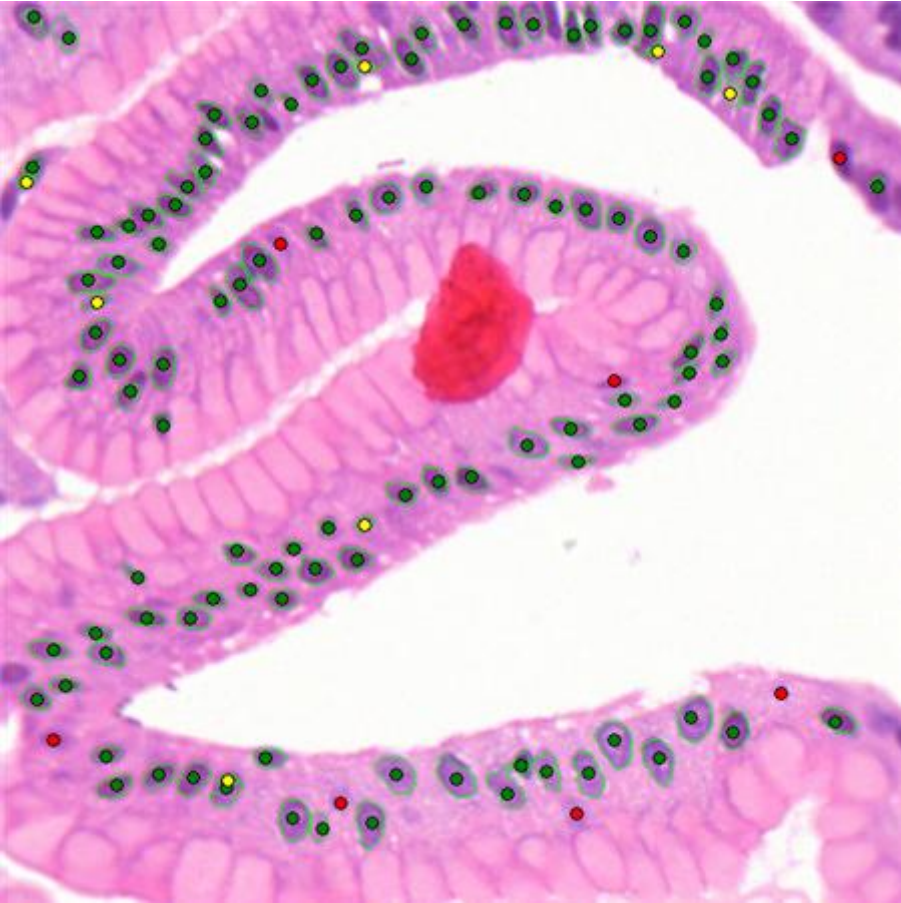

Wienert

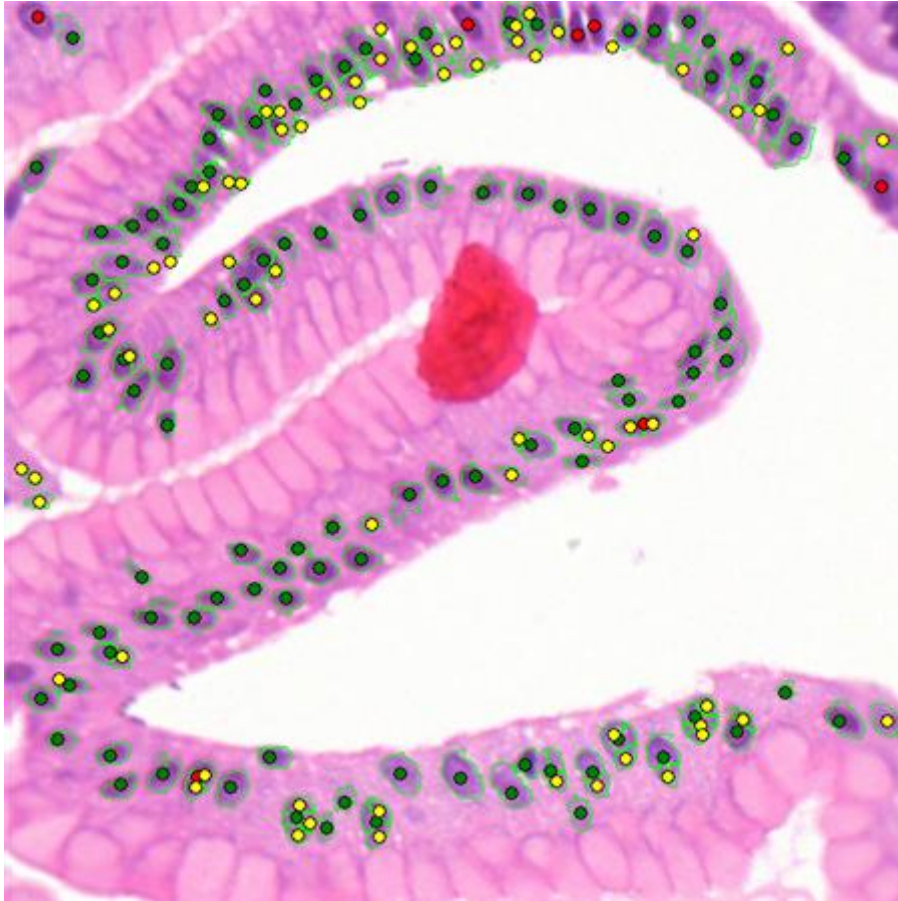

AI-Kofahi (optimized)

|                      | Wienert | AI-Kofahi (automatic) | AI-Kofahi (optimized) |
|----------------------|---------|-----------------------|-----------------------|
| nuclei               | 115     | 115                   | 115                   |
| true positive count  | 108     | 109                   | 108                   |
| false negative count | 7       | 6                     | 7                     |
| false positive count | 7       | 153                   | 68                    |
| precision            | 0,939   | 0,416                 | 0,614                 |
| recall               | 0,939   | 0,948                 | 0,939                 |
| conglomerate         | 0,991   | 0,963                 | 0,963                 |
| time(ms)             | 670     | 624                   | 1653                  |

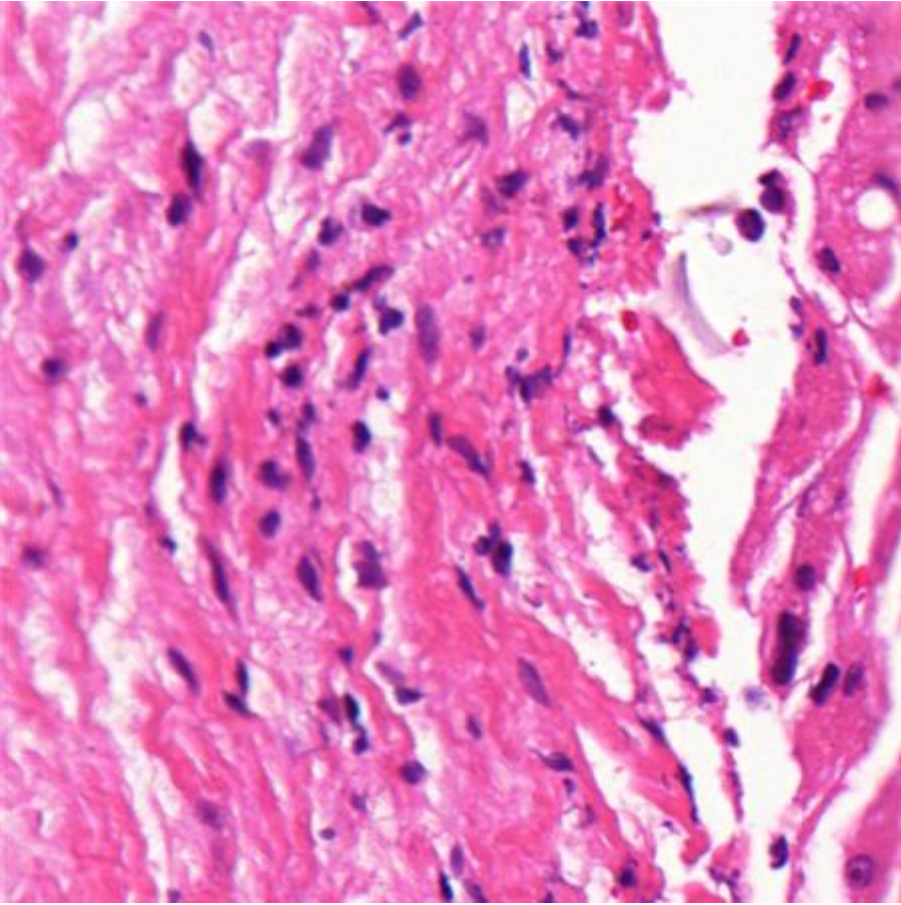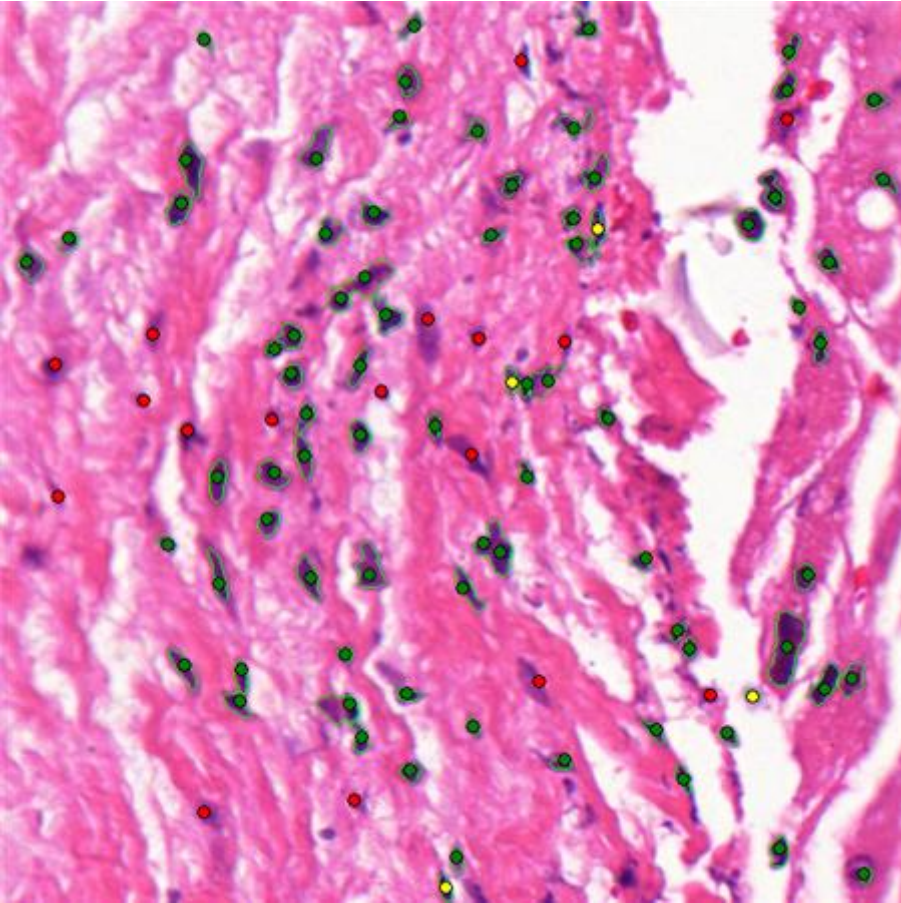

Wienert

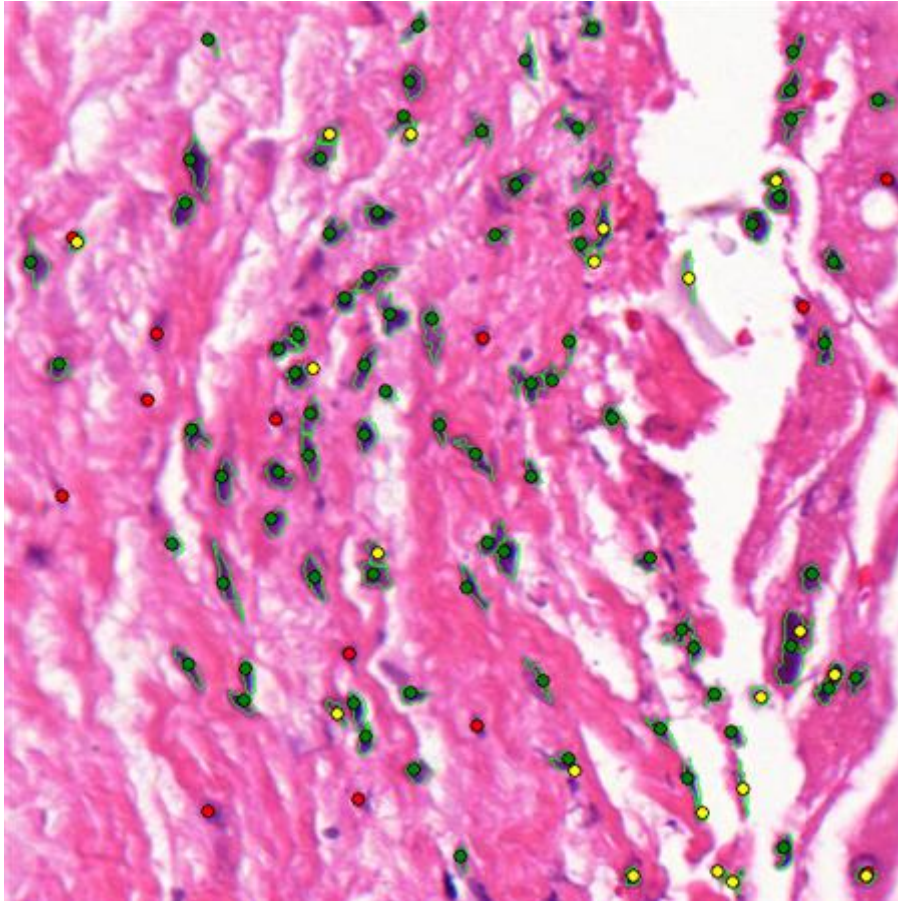

AI-Kofahi (optimized)

|                      | <b>Wienert</b> | <b>AI-Kofahi (automatic)</b> | <b>AI-Kofahi (optimized)</b> |
|----------------------|----------------|------------------------------|------------------------------|
| nuclei               | 93             | 93                           | 93                           |
| true positive count  | 76             | 80                           | 80                           |
| false negative count | 17             | 13                           | 13                           |
| false positive count | 4              | 35                           | 20                           |
| precision            | 0,950          | 0,696                        | 0,800                        |
| recall               | 0,817          | 0,860                        | 0,860                        |
| conglomerate         | 0,961          | 1,000                        | 1,000                        |
| time(ms)             | 514            | 624                          | 1372                         |

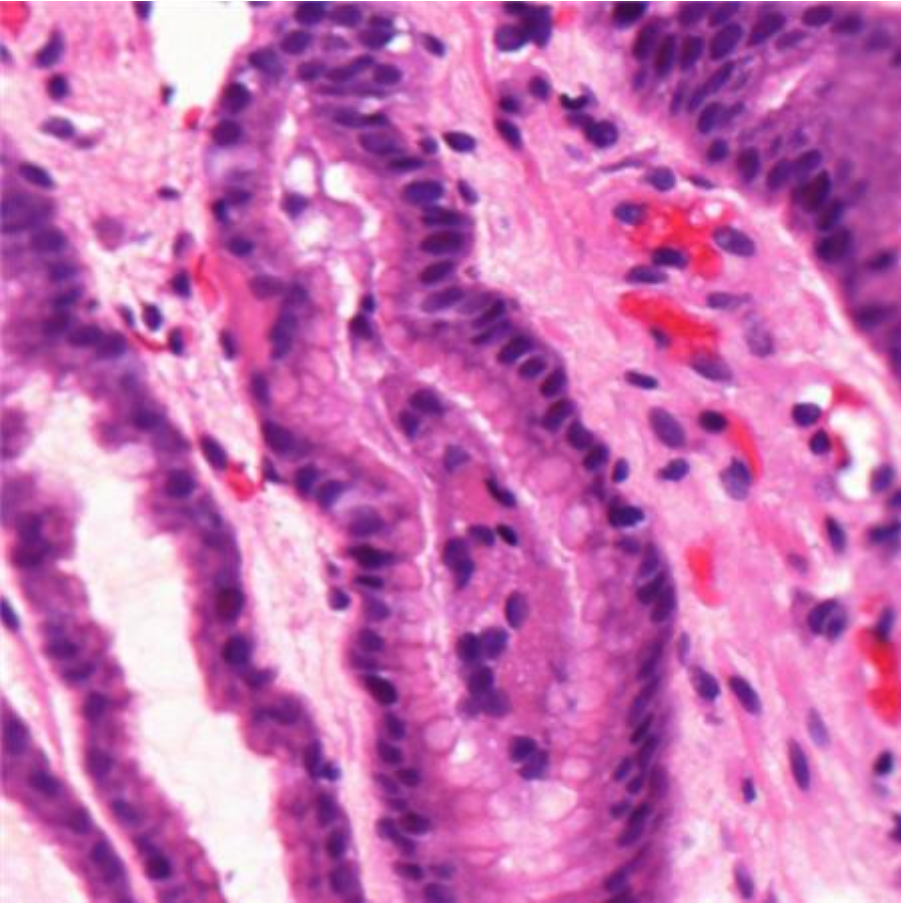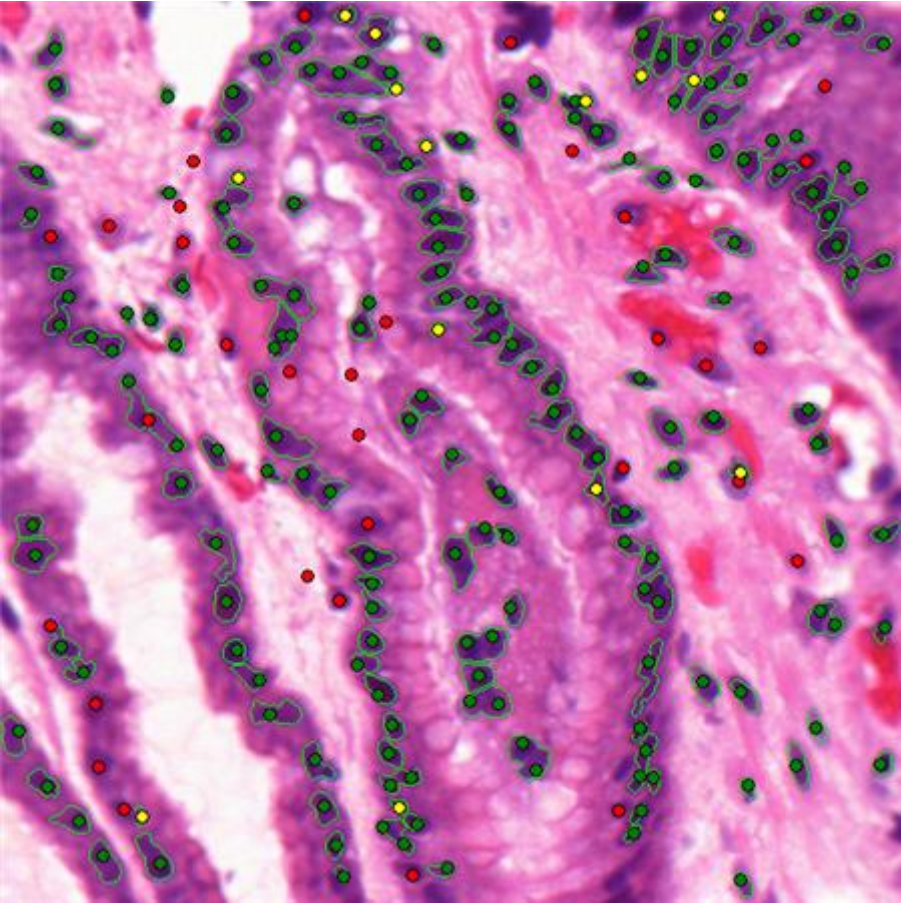

Wienert

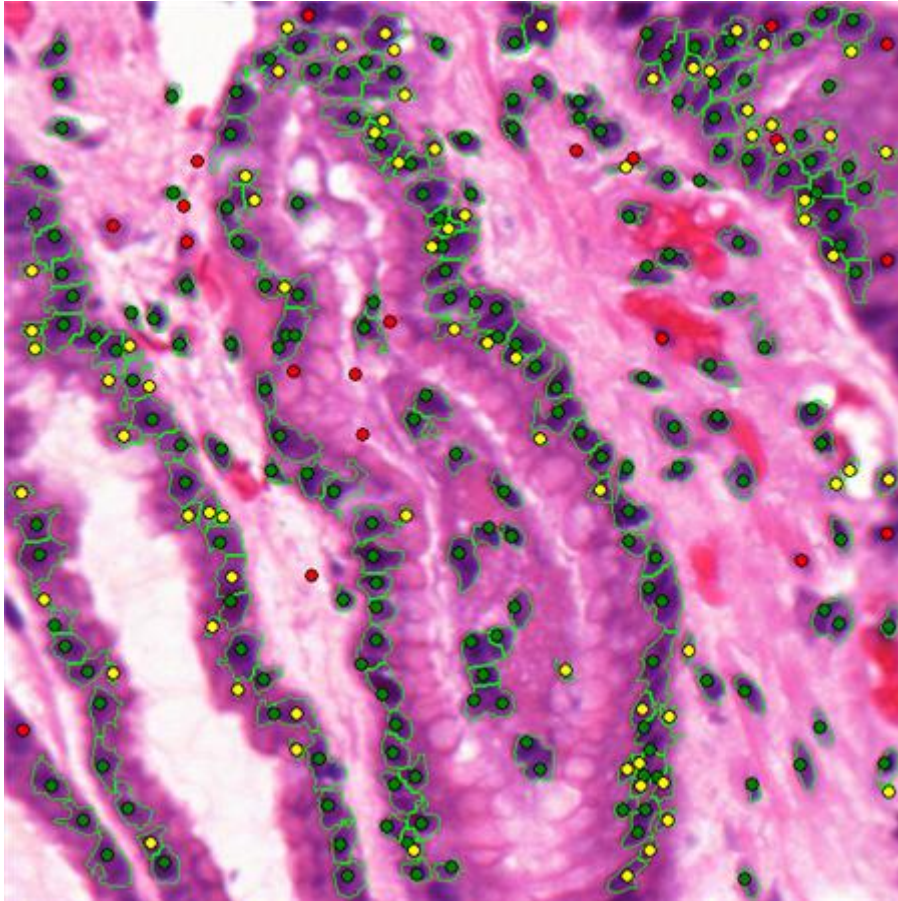

Al-Kofahi (optimized)

|                      | Wienert | Al-Kofahi (automatic) | Al-Kofahi (optimized) |
|----------------------|---------|-----------------------|-----------------------|
| nuclei               | 210     | 210                   | 210                   |
| true positive count  | 177     | 191                   | 190                   |
| false negative count | 33      | 19                    | 20                    |
| false positive count | 21      | 174                   | 74                    |
| precision            | 0,894   | 0,523                 | 0,720                 |
| recall               | 0,843   | 0,910                 | 0,905                 |
| conglomerate         | 0,904   | 0,906                 | 0,926                 |
| time(ms)             | 717     | 639                   | 2324                  |

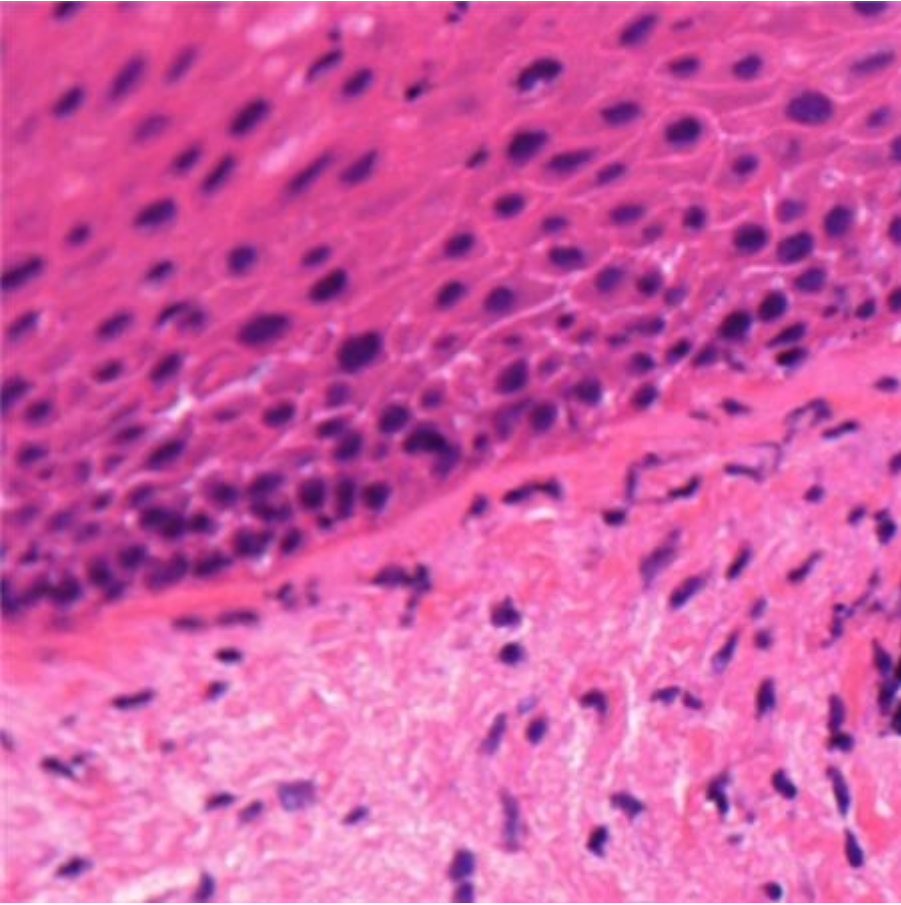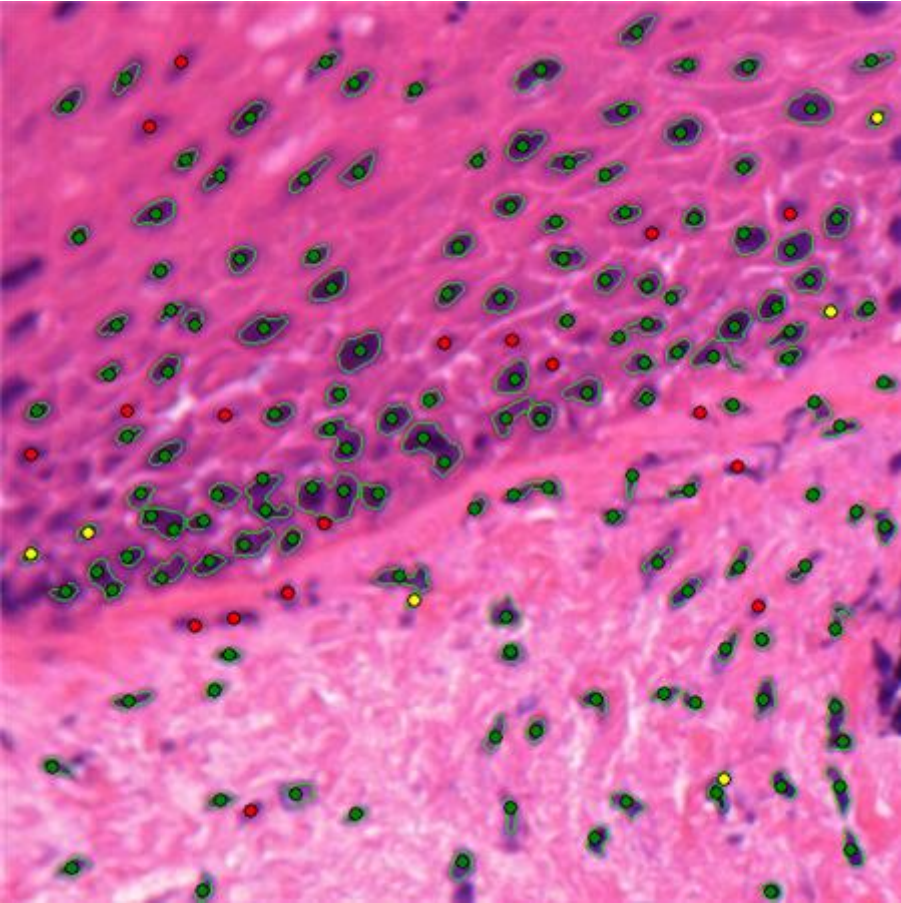

Wienert

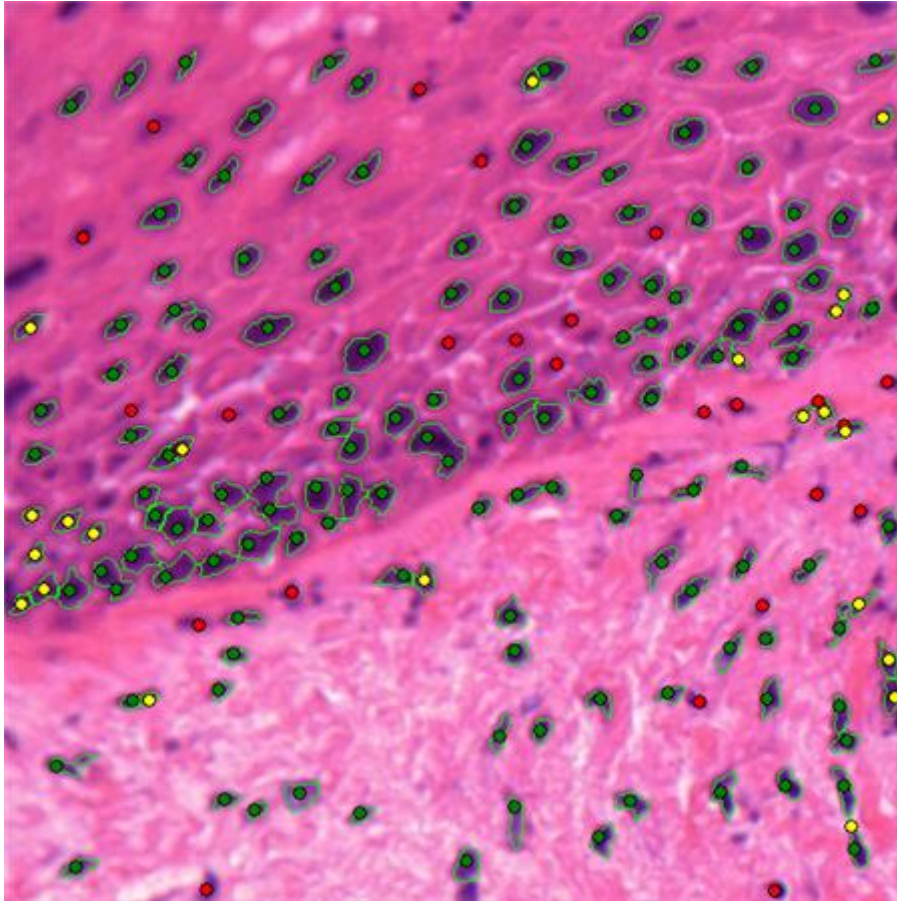

Al-Kofahi (optimized)

|                      | Wienert | Al-Kofahi (automatic) | Al-Kofahi (optimized) |
|----------------------|---------|-----------------------|-----------------------|
| nuclei               | 163     | 163                   | 163                   |
| true positive count  | 145     | 139                   | 139                   |
| false negative count | 18      | 24                    | 24                    |
| false positive count | 6       | 34                    | 22                    |
| precision            | 0,960   | 0,803                 | 0,863                 |
| recall               | 0,890   | 0,853                 | 0,853                 |
| conglomerate         | 0,945   | 0,986                 | 0,986                 |
| time(ms)             | 499     | 795                   | 1575                  |



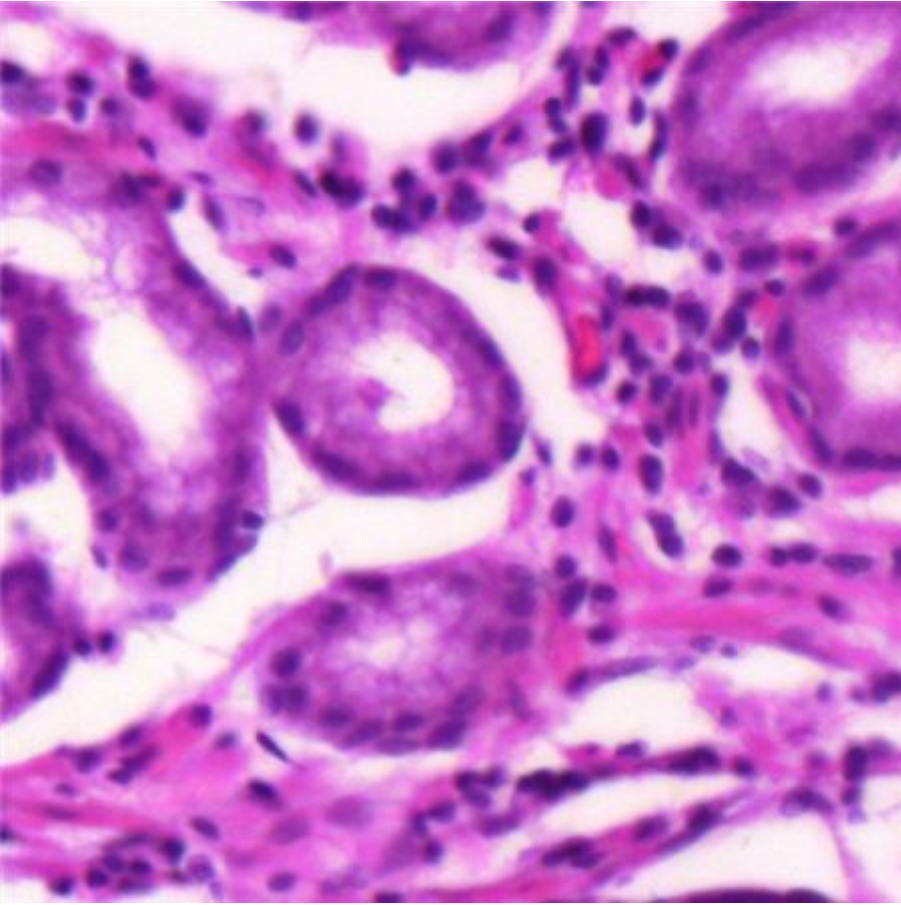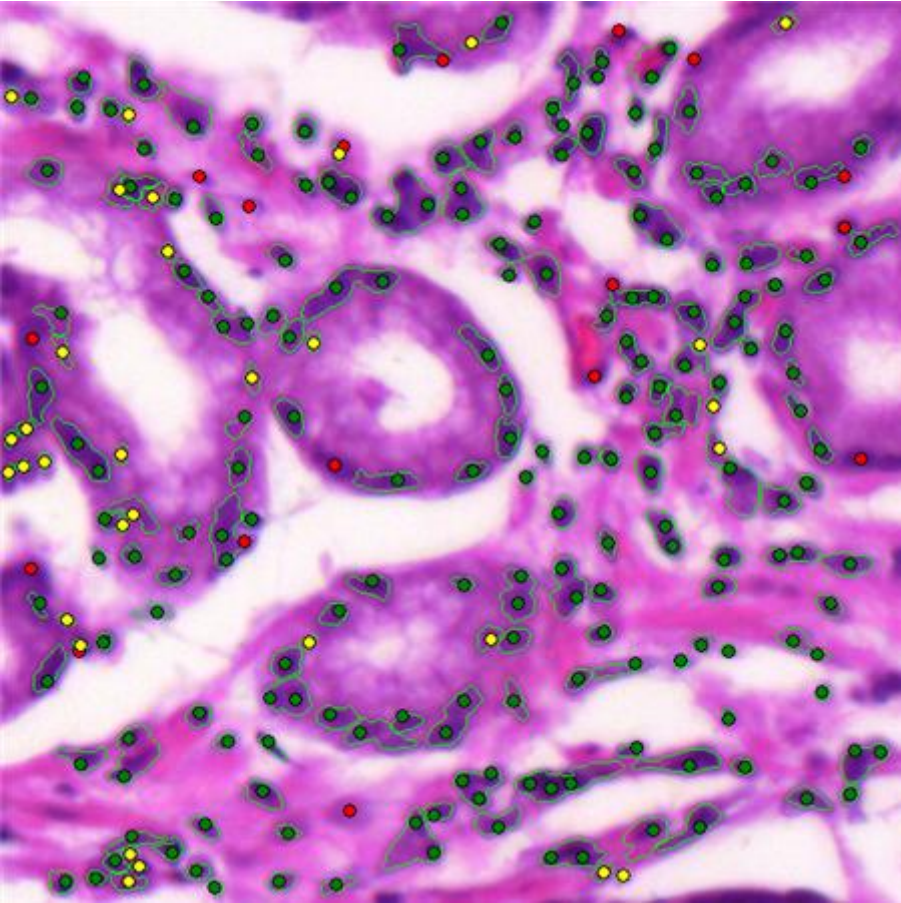

Wienert

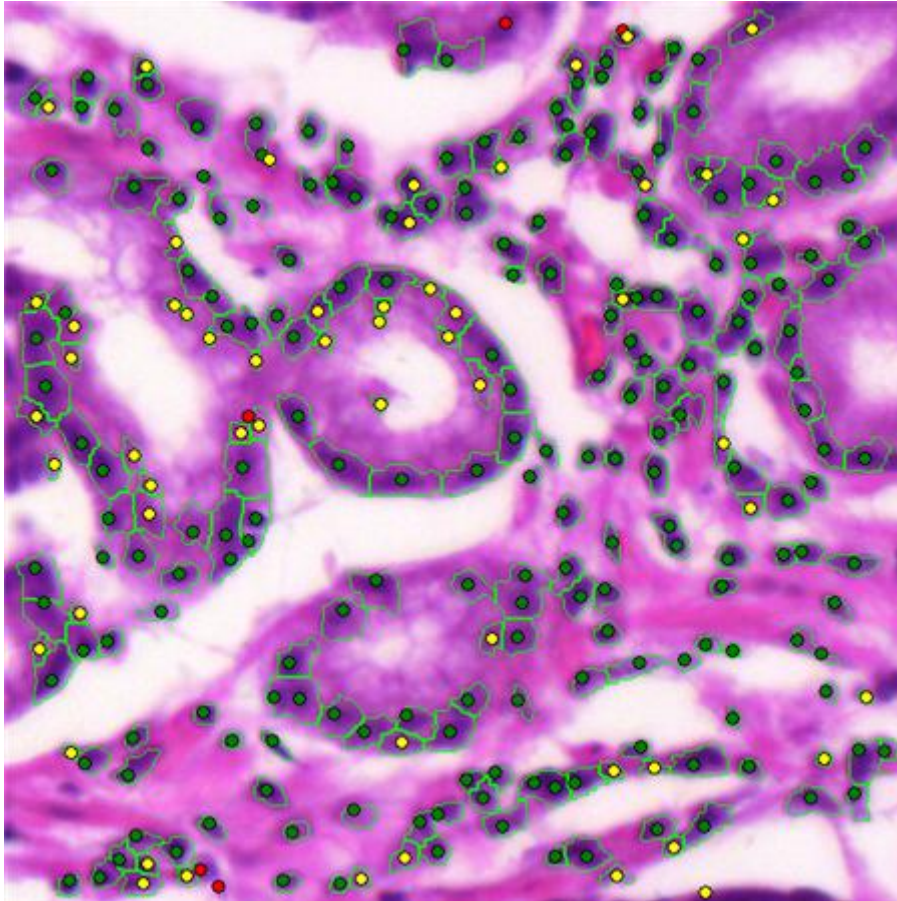

AI-Kofahi (optimized)

|                      | <b>Wienert</b> | <b>AI-Kofahi (automatic)</b> | <b>AI-Kofahi (optimized)</b> |
|----------------------|----------------|------------------------------|------------------------------|
| nuclei               | 211            | 211                          | 211                          |
| true positive count  | 194            | 208                          | 206                          |
| false negative count | 17             | 3                            | 5                            |
| false positive count | 31             | 67                           | 57                           |
| precision            | 0,862          | 0,756                        | 0,783                        |
| recall               | 0,919          | 0,986                        | 0,976                        |
| conglomerate         | 0,851          | 0,899                        | 0,932                        |
| time(ms)             | 764            | 702                          | 2262                         |

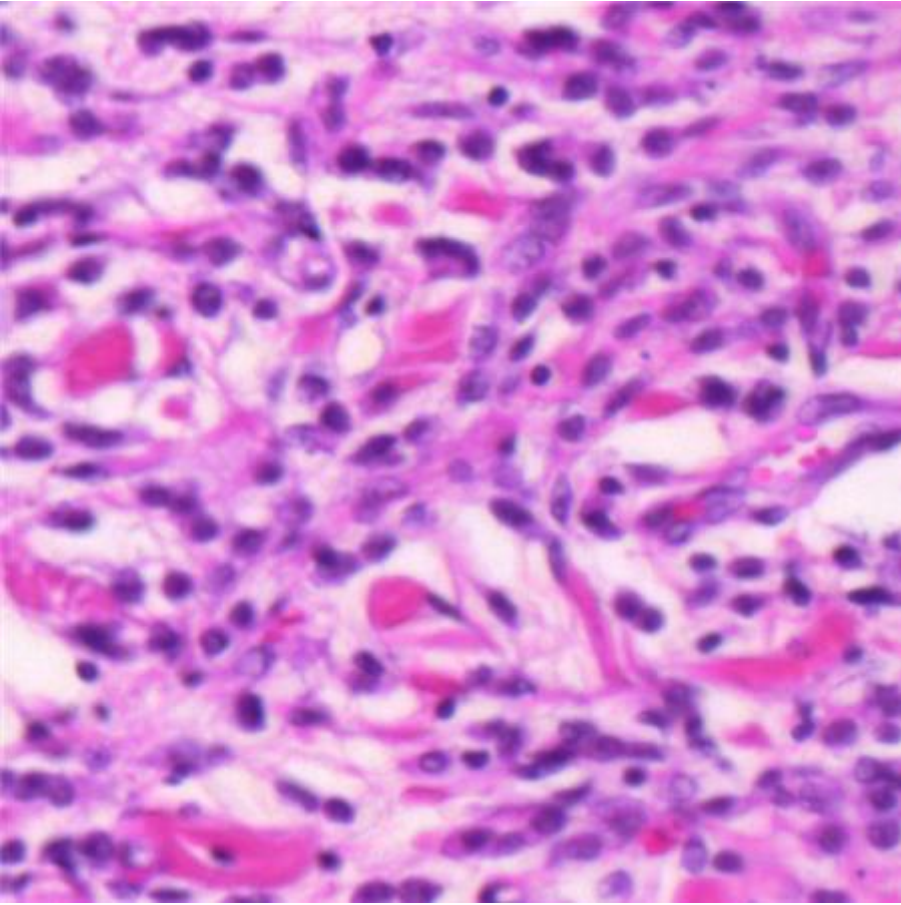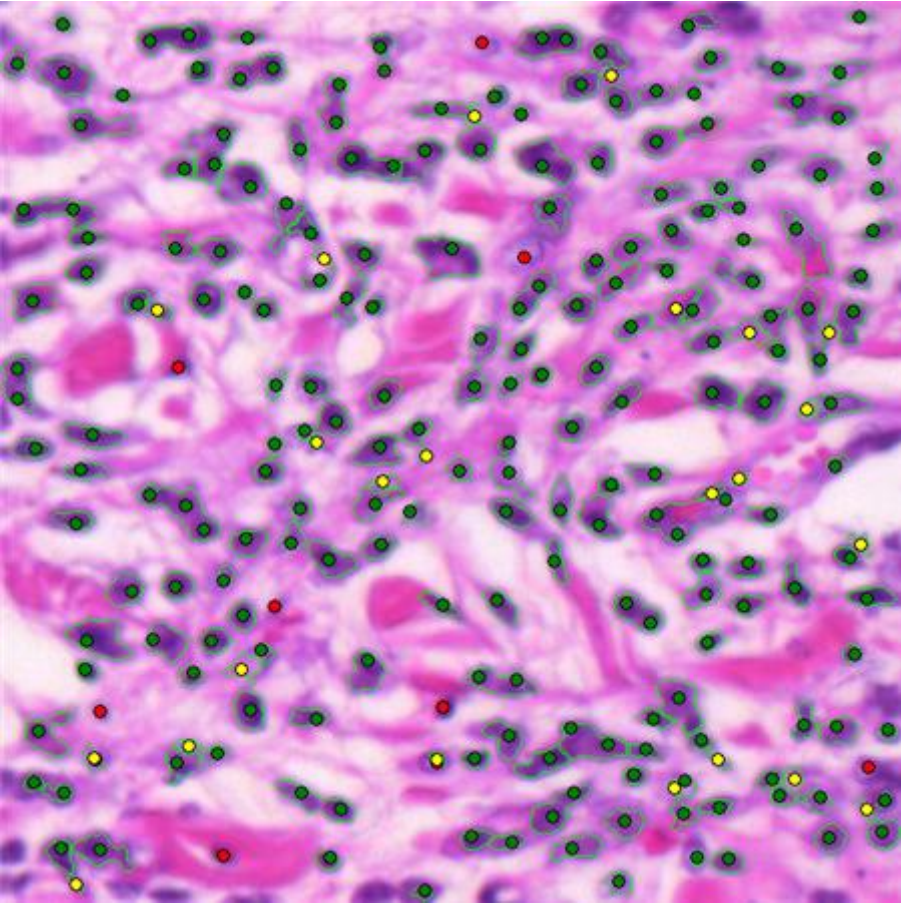

Wienert

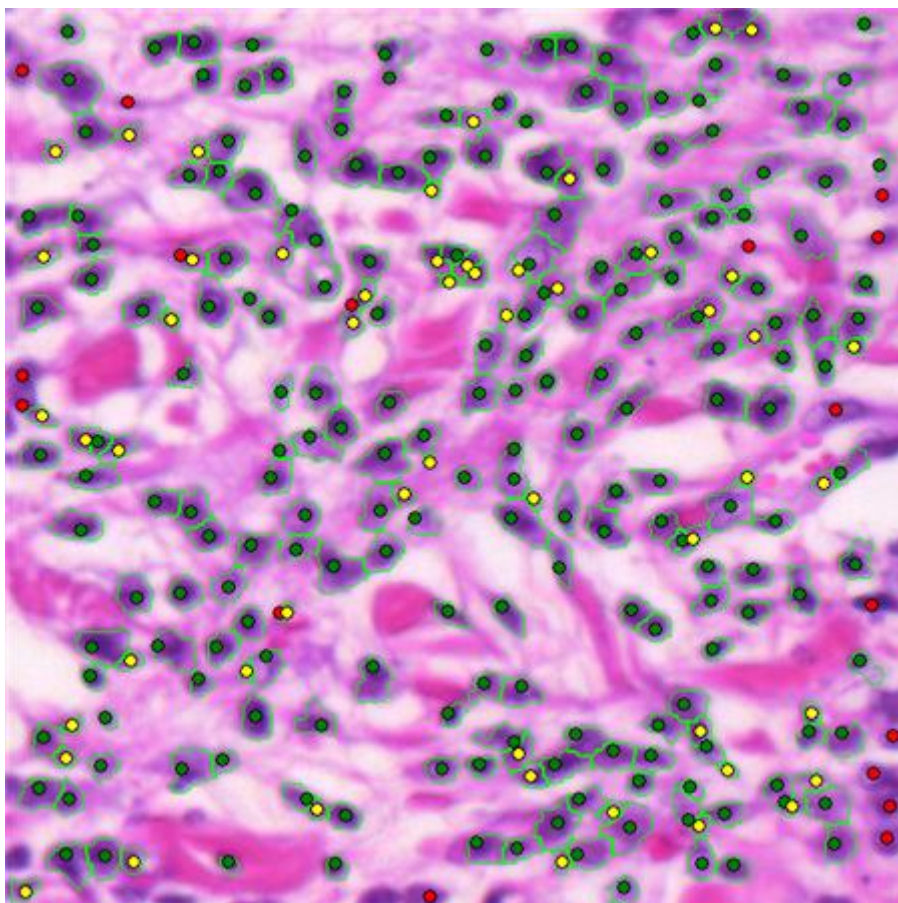

|                      | <b>Wienert</b> | <b>Al-Kofahi (automatic)</b> | <b>Al-Kofahi (optimized)</b> |
|----------------------|----------------|------------------------------|------------------------------|
| nuclei               | 223            | 223                          | 223                          |
| true positive count  | 213            | 207                          | 206                          |
| false negative count | 10             | 16                           | 17                           |
| false positive count | 23             | 52                           | 53                           |
| precision            | 0,903          | 0,799                        | 0,795                        |
| recall               | 0,955          | 0,928                        | 0,924                        |
| conglomerate         | 0,906          | 0,971                        | 0,981                        |
| time(ms)             | 920            | 639                          | 2121                         |



### **Note S3: Example of influence of image focus on cell nucleus segmentation**

Cell nuclei that are out-of-focus typically have shallower gradients at the object border than in-focus nuclei. Because the proposed method selects for the locally most prominent contours and because no thresholding is used with respect to the object intensity or the gradient our method is relatively robust against image blur. To exemplify this we acquired a sequence of images with a microscope camera of the same cell but with different focus levels from sharp (Fig. 1a) to strongly blurred (Fig. 1e) in certain intervals using the microscope's fine drive. As can be seen in the below example figure (Fig. 1), while there is some small variation in the exact course of the contour, cell nuclei are detected robustly for all focus levels except the strongest out-of-focus example. However, this last test image hardly shows any discernible cell nucleus.

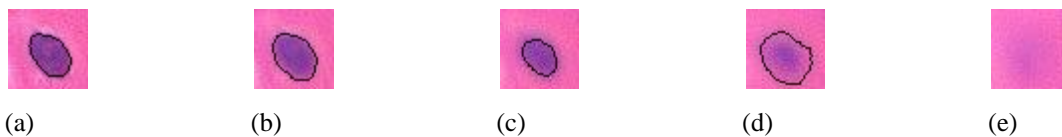

**Fig. 1: Contour and cell nucleus detection performance as a function of decreasing focus levels ranging from sharp (a) to heavily blurred (e). Tile size  $20\mu\text{m} \times 20\mu\text{m}$ .**

#### Note S4: Application in the field of correlative light electron microscopy

Correlative light electron microscopy (CLEM) [e.g. Vicidomini et al. 2008 and Vicidomini et al. 2010] uses a combination of different imaging modalities, such as confocal laser scanning microscopy (CLSM) and transmission electron microscopy (TEM) and relies on image segmentation and registration techniques to colocalize functional/molecular (CLSM) and ultrastructural (TEM) information. Because of its minimum-model approach our segmentation method may be applied to different imaging modalities such as CLSM and TEM (Fig. 1). It may therefore also be of use in future CLEM applications including automated image registration based on the segmentation results.

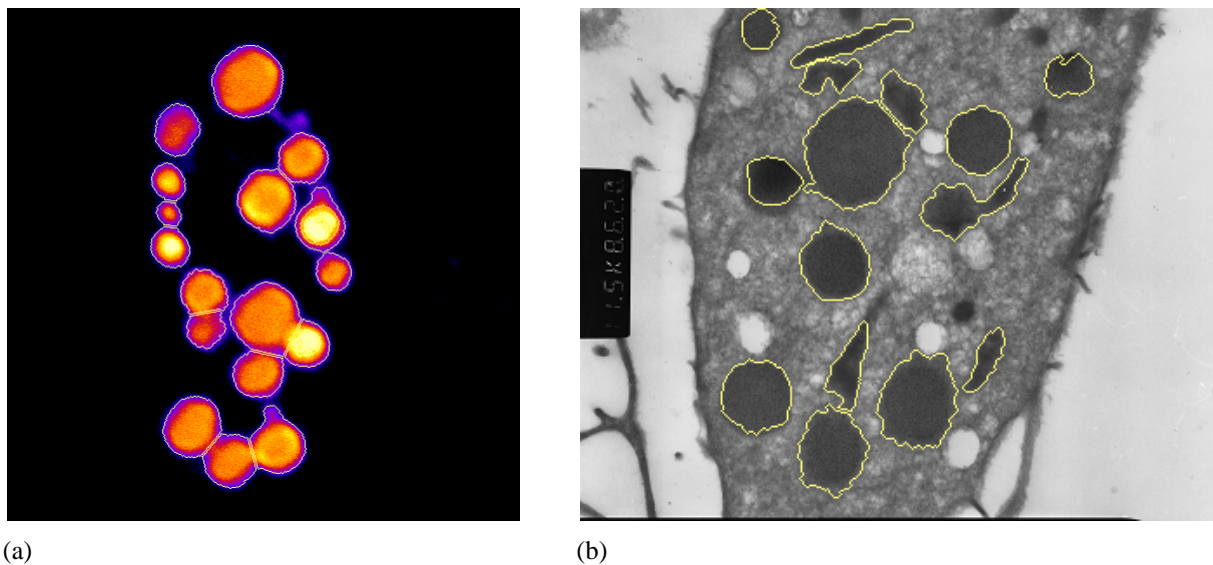

Fig. 1: Rough Russel bodies segmented using the method presented in this paper of (a) confocal laser scanning microscopy (CLSM) and (b) transmission electron microscopy (TEM). Modifications of the algorithm: minContourLength=50, maxContourLength=500. Color deconvolution was not applied. Objects with a size below 350 pixels were removed. Additionally, (b) was reduced to 10% of the original size, smoothed with a 3x3 median filter and objects with a mean intensity outside the interval [25;85] were removed. Images were kindly provided by Giuseppe Vicidomini and Carlo Tacchetti (MicroSCoBiO Research Center, University of Genoa, Italy).

## Methods S5: Seed point and extremal value detection

- input:  $I$ , grayscale image of size  $M \times N$
- input:  $maxLength$ , the maximum contour length in pixel

```
for v=0 to N-1
{
  /* Initialize the intensity variables */
  previousIntensity←I(0, v)
  intensity←I(1, v)

  /* Initialize the extremal variables */
  intensityOfMaxGradient←intensity
  minIntensity←previousIntensity
  maxIntensity←previousIntensity
  indexOfMinIntensity←0
  indexOfMaxIntensity←0
  indexOfMaxGradient←0
  maxGradient←-1

  /* "Walk" along the one dimensional image function */
  for u=1 to M-2
  {
    /* Read and store the value of the next pixel */
    nextIntensity←I(u+1, v)

    /* Update value and position of minimum intensity */
    if intensity<minIntensity
    {
      minIntensity←intensity
      indexOfMinIntensity←u
    }

    /* Update value and position of maximum intensity */
    if intensity>maxIntensity
    {
      maxIntensity←intensity
      indexOfMaxIntensity←u
    }

    /* Compute the local gradient */
    gradient←intensity-previousIntensity

    /* Turn into positive value if required */
    if gradient<0
    {
      gradient←-gradient
    }

    /* Update position and value of maximum local gradient */
    if gradient>maxLocalGradient
    {
      maxLocalGradient←gradient
      indexOfMaxLocalGradient←u
    }

    /* Determine if the slope is positive or negative */
    increasing←indexOfMinIntensity<indexOfMaxIntensity
    decreasing←indexOfMaxIntensity<indexOfMinIntensity

    /* Start 2D contour tracing if a local extremal value is reached */
    if (increasing && nextIntensity<intensity) || (decreasing && nextIntensity>intensity)
    {
      /* Compute the minimum and maximum intensity for the 2D contour tracing */
      if increasing
      {
        minObjectIntensity←intensityOfMaxGradient
        maxObjectIntensity←maxIntensity
      }
      else
      {
        maxObjectIntensity←intensityOfMaxGradient
        minObjectIntensity←minIntensity
      }
    }
  }
}
```



```
/* Trace and store 2D contour starting where the local gradient is maximal Pixels
/* with an intensity value between minIntensity and maxIntensity are interpreted as
/* object pixel (foreground) */
TraceAndStore2DContour(indexOfMaxLocalGradient, v, minIntensity, maxIntensity)

/* Reset the extremal variables */
minIntensity-intensity
maxIntensity-intensity
indexOfMinIntensity-u
indexOfMaxIntensity-u
maxGradient--1
}

/* Shift the intensity values */
previousIntensity-intensity
intensity-nextIntensity
}
}
```

### Methods S6: Description of the “8M” algorithm [Hufnagl. et al.]

Object pixels are distinct from background pixels based on the specific object intensity range determined by scanning the image rows from left to right (see Methods section). Contour start pixels (seeds) are therefore at the objects left side. The initial search direction is “up”. Based on the current contour pixel paraxial neighbours are tested clockwise. If one of these neighbours belongs to the current object the neighbour in counterclockwise direction is also tested. The contour continues with that pixel if it also belongs to the current object (see Fig. 1 below). The contour tracing stops when it reaches back to its seed and the contour pixel it would continue with is the same as the 2<sup>nd</sup> contour pixel. Alternatively the contour tracing is terminated if a maximum contour length (given by the total image perimeter by default) is exceeded.

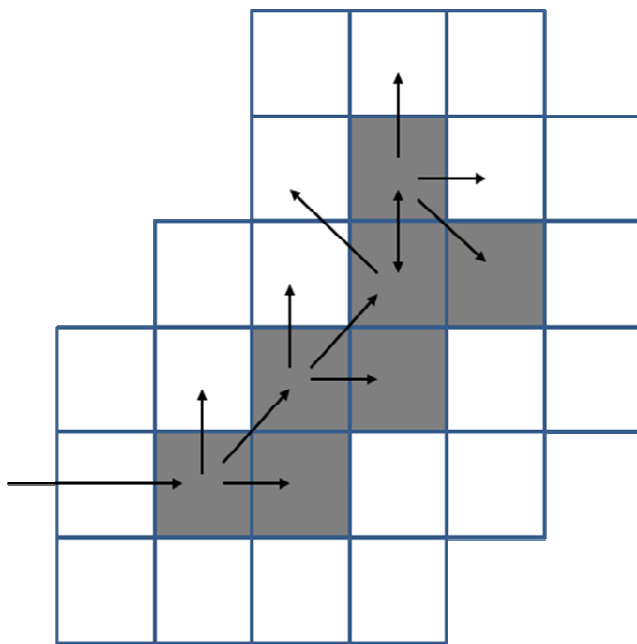

Fig. 1: Demonstration of contour tracing (Hufnagl. et al.).

## Methods S7: Remove non-compact object pixels

```
- input:  $I$ , label image of size  $M \times N$ 
- input:  $distance$ , the initial distance value for testing compactness
- output:  $I_2$ , label image of size  $M \times N$ 

/* Initialization */
Set up a new label image  $I_2(u, v)$  of size  $M \times N$ 

/* Compute the Distance Transformation */
D←GetDistanceMap( $I$ )

/* Decrement distance values that are not connected to a higher distance */
for  $d←distance-1$  to 1
{
  for  $v←0$  to  $N-1$ 
  {
    for  $u←0$  to  $M-1$ 
    {
      /* Get the current distance */
       $d0←D(u, v)$ 

      /* No action when the current distance value is different */
      if  $d0 <> d$ 
      {
        continue
      }

      /* Get the distance values of the four neighboring pixels */
       $d1←D(u+1, v)$ 
       $d2←D(u, v+1)$ 
       $d3←D(u-1, v)$ 
       $d4←D(u, v-1)$ 

      /* Decrement the distance value when not connected to a distance value of  $d+1$  */
      if  $d1 ≤ d \ \&\& \ d2 ≤ d \ \&\& \ d3 ≤ d \ \&\& \ d4 ≤ d$ 
      {
         $D(u, v) ← d-1$ 
      }
    }
  }
}

/* Delete all labels that (now) are zero in the distance transformation */
for  $v←0$  to  $N-1$ 
{
  for  $u←0$  to  $M-1$ 
  {
    if  $D(u, v) > 0$ 
    {
       $I_2(u, v) ← I(u, v)$ 
    }
    else
    {
       $I_2(u, v) ← 0$ 
    }
  }
}

return  $I_2$ 
```

## Methods S8: Separate concave objects

```
- input: I, label image of size  $M \times N$ 
- input: minDepth, the minimum depth of concave contour segments

do
{
  /* Process all contours in I */
  for each contour c contained in I
  {
    /* Find all concave points of c */
    candidates←DetectConcavePoints(c)

    /* Initialize the minimum score */
    minScore←positive infinity

    /* Select the cutting start point */
    for m-1 to count(candidates)-1
    {
      /* Process next candidate if depth is too low */
      if depth(candidatesm)<minDepth
      {
        continue
      }

      /* Select the cutting end point */
      for n-m+1 to count(candidates)
      {
        /* Process next candidate if depth is too low */
        if depth(candidatesn)<minDepth
        {
          continue
        }

        /* Compute the length and angles of the cutting line */
        r←GetDistance(candidatesm, candidatesn)
        am←GetAngle(candidatesm, candidatesn)
        an←GetAngle(candidatesn, candidatesm)

        /* Compute the angle between concave contour segment and cutting line */
        dam←GetAngleBetween(candidatesm, am)
        dan←GetAngleBetween(candidatesn, an)

        /* Compute the score of the cutting line */
        score←(r/(r+depth(candidatesm))+depth(candidatesm))+(dam+dan)/2 $\pi$ )/2

        /* Update the minimum score and the corresponding points */
        if score<minScore
        {
          minScore←score

          pstart←candidatesm
          pend←candidatesn
        }
      }
    }
  }

  /* Cut between the best two candidate if found */
  if minScore<positive infinity
  {
    CutLinear(I, pstart, pend)
  }
}
while cutting lines found
```
